# Supplementary material for: Characterization of the bacterial microbiota composition and evolution at different intestinal tract in wild pigs (Sus scrofa ussuricus)
Source: PeerJ. 2020 May 26;8:e9124. doi: 10.7717/peerj.9124 (PMC7258971; doi:10.7717/peerj.9124)
Supplement: Table S6 [file peerj-08-9124-s006.xlsx]

## Sheet: 工作表1
Table S6. The analysis results of the 5 gut locations bacterial taxa differentially in wild pigs by LEFSe.
Taxonomy	Mean relative abundance within the group(Logarithmic conversion value)	Location	LDA score	P value
Bacteria.Firmicutes.Clostridia.Clostridiales.Eubacteriaceae	2.84615			-
Bacteria.Proteobacteria.Alphaproteobacteria.Rhizobiales.Methylobacteriaceae	2.75879			-
Bacteria.Proteobacteria.Alphaproteobacteria.Rhizobiales.Brucellaceae.Ochrobactrum	4.16336			-
Bacteria.Firmicutes.Clostridia.Clostridiales.Lachnospiraceae.Anaerostipes	1.8991			-
Bacteria.Actinobacteria.Actinobacteria.Actinomycetales.Micrococcaceae.Arthrobacter	1.90075			-
Bacteria.Firmicutes.Bacilli.Lactobacillales.Streptococcaceae	3.56817			-
Bacteria.Firmicutes.Clostridia.Clostridiales.Dehalobacteriaceae	2.85406			-
Bacteria.Actinobacteria.Actinobacteria.Actinomycetales.Pseudonocardiaceae	3.82151			-
Bacteria.Bacteroidetes.Bacteroidia.Bacteroidales.Bacteroidaceae.Bacteroides	3.09705			-
Bacteria.Proteobacteria.Alphaproteobacteria.Rhizobiales.Phyllobacteriaceae	2.70765			-
Bacteria.Firmicutes.Bacilli.Bacillales.Bacillaceae.Bacillus	2.72029			-
Bacteria.Acidobacteria.Solibacteres	1.67963			-
Bacteria.Verrucomicrobia.Verruco_5.WCHB1_41.RFP12	4.04141	E	3.79864	0.0339256
Bacteria.Bacteroidetes	5.22759			-
Bacteria.Firmicutes.Clostridia.Clostridiales.Veillonellaceae.Anaerovibrio	2.84596			-
Bacteria.Firmicutes.Clostridia.Clostridiales.Veillonellaceae.Acidaminococcus	3.59344			-
Bacteria.Firmicutes.Clostridia.Clostridiales.Ruminococcaceae	4.84926	D	4.56522	0.022418
Bacteria.Firmicutes.Bacilli.Lactobacillales.Lactobacillaceae.Lactobacillus	5.06583			-
Bacteria.Firmicutes.Clostridia.Clostridiales.Clostridiaceae.SMB53	3.81957			-
Bacteria.Firmicutes.Erysipelotrichi.Erysipelotrichales	5.17865			-
Bacteria.Actinobacteria.Actinobacteria.Actinomycetales.Corynebacteriaceae	2.69441			-
Bacteria.Firmicutes.Bacilli.Bacillales.Planococcaceae	4.67832			-
Bacteria.OD1	1.90134			-
Bacteria.Firmicutes.Clostridia.Clostridiales.Lachnospiraceae.Lachnospira	2.95576			-
Bacteria.Proteobacteria.Gammaproteobacteria.Enterobacteriales	3.12111			-
Bacteria.Synergistetes.Synergistia.Synergistales.Synergistaceae	2.24339			-
Bacteria.Proteobacteria.Gammaproteobacteria.Pseudomonadales.Moraxellaceae.Acinetobacter	3.46185			-
Bacteria.Firmicutes.Clostridia.Clostridiales.Ruminococcaceae.Ruminococcus	3.76104	E	3.52775	0.0230625
Bacteria.Firmicutes.Clostridia.Clostridiales.Ruminococcaceae.Oscillospira	3.23263			-
Bacteria.Proteobacteria.Alphaproteobacteria.Rhizobiales	4.24144			-
Bacteria.Planctomycetes.Phycisphaerae	2.04741			-
Bacteria.Proteobacteria.Deltaproteobacteria.Desulfovibrionales	3.7857			-
Bacteria._Thermi_.Deinococci	2.48126			-
Bacteria.Proteobacteria.Betaproteobacteria.Burkholderiales.Oxalobacteraceae	2.15675			-
Bacteria.Proteobacteria.Epsilonproteobacteria	1.98066			-
Bacteria.Armatimonadetes._Fimbriimonadia_._Fimbriimonadales_	2.0476			-
Bacteria.Cyanobacteria	4.49211			-
Bacteria.Proteobacteria.Gammaproteobacteria.Pasteurellales.Pasteurellaceae.Actinobacillus	1.20147			-
Bacteria.Firmicutes.Bacilli.Lactobacillales.Aerococcaceae.Facklamia	1.50196			-
Bacteria.Proteobacteria.Gammaproteobacteria.Enterobacteriales.Enterobacteriaceae.Serratia	1.80373			-
Bacteria.Firmicutes.Erysipelotrichi.Erysipelotrichales.Erysipelotrichaceae.Bulleidia	4.35734			-
Bacteria.Actinobacteria.Actinobacteria	5.56865			-
Bacteria.Firmicutes.Clostridia.Clostridiales.Clostridiaceae.02d06	3.62243	D	3.40471	0.0408314
Bacteria.Proteobacteria.Alphaproteobacteria.Rhizobiales.Methylobacteriaceae.Methylobacterium	2.63384			-
Bacteria.Firmicutes.Erysipelotrichi.Erysipelotrichales.Erysipelotrichaceae.L7A_E11	2.40599			-
Bacteria.Proteobacteria.Alphaproteobacteria.Rhizobiales.Hyphomicrobiaceae.Devosia	1.50353			-
Bacteria._Thermi_.Deinococci.Thermales.Thermaceae.Thermus	2.48126			-
Bacteria.Lentisphaerae._Lentisphaeria_.Victivallales.Victivallaceae	2.70765			-
Bacteria.Synergistetes.Synergistia.Synergistales.Dethiosulfovibrionaceae	2.28169			-
Bacteria.Bacteroidetes.Bacteroidia.Bacteroidales.S24_7	4.14975	E	3.83655	0.0216014
Bacteria.Proteobacteria.Alphaproteobacteria.Sphingomonadales.Sphingomonadaceae.Sphingomonas	2.63384			-
Bacteria.Bacteroidetes.Bacteroidia.Bacteroidales.Rikenellaceae	2.69126			-
Bacteria.Proteobacteria.Gammaproteobacteria.Pseudomonadales.Pseudomonadaceae	4.35704			-
Bacteria.Proteobacteria.Gammaproteobacteria.Pseudomonadales.Pseudomonadaceae.Pseudomonas	4.27317			-
Bacteria.Proteobacteria.Alphaproteobacteria.Rhizobiales.Rhizobiaceae.Agrobacterium	3.06576			-
Bacteria.Planctomycetes.Phycisphaerae.Phycisphaerales	2.04741			-
Bacteria.Spirochaetes.Spirochaetes.Spirochaetales.Spirochaetaceae	3.9973	D	3.70629	0.016091
Bacteria.Firmicutes.Clostridia.Clostridiales._Mogibacteriaceae_	4.35627			-
Bacteria.Actinobacteria.Actinobacteria.Bifidobacteriales.Bifidobacteriaceae	5.56549			-
Bacteria.Proteobacteria.Betaproteobacteria.Burkholderiales.Comamonadaceae.Delftia	1.80456			-
Bacteria.Firmicutes.Bacilli.Lactobacillales.Streptococcaceae.Streptococcus	3.56817			-
Bacteria.Lentisphaerae._Lentisphaeria_.Victivallales	2.70765			-
Bacteria.Bacteroidetes.Flavobacteriia.Flavobacteriales._Weeksellaceae_	5.04861			-
Bacteria.Proteobacteria.Betaproteobacteria.Burkholderiales.Oxalobacteraceae.Oxalobacter	1.80637			-
Bacteria.Proteobacteria.Gammaproteobacteria.Pseudomonadales	5.37335			-
Bacteria.Firmicutes.Bacilli.Turicibacterales.Turicibacteraceae	3.97599			-
Bacteria.Armatimonadetes._Fimbriimonadia_	2.0476			-
Bacteria.Actinobacteria.Actinobacteria.Actinomycetales.Dietziaceae	1.8962			-
Bacteria.Bacteroidetes.Bacteroidia.Bacteroidales._Paraprevotellaceae_.YRC22	2.67465			-
Bacteria.Spirochaetes.Spirochaetes	4.01429	D	3.7401	0.027478
Bacteria.Firmicutes.Bacilli.Lactobacillales.Carnobacteriaceae.Trichococcus	1.90044			-
Bacteria.Actinobacteria.Actinobacteria.Actinomycetales	3.93033	C	3.63443	0.0310091
Bacteria.Actinobacteria.Actinobacteria.Actinomycetales.Microbacteriaceae.Microbacterium	2.10559			-
Bacteria.Firmicutes.Clostridia.Clostridiales.Lachnospiraceae.Dorea	3.05829	E	3.22575	0.017388
Bacteria.Firmicutes.Clostridia.Clostridiales.Christensenellaceae	3.48683	E	3.25826	0.0413775
Bacteria.Actinobacteria.Coriobacteriia.Coriobacteriales.Coriobacteriaceae.Adlercreutzia	3.19113	D	3.00469	0.0317423
Bacteria.Spirochaetes	4.01429	D	3.7364	0.027478
Bacteria.Proteobacteria.Betaproteobacteria.Burkholderiales.Comamonadaceae	2.72096			-
Bacteria.Actinobacteria.Actinobacteria.Bifidobacteriales.Bifidobacteriaceae.Bifidobacterium	5.54303			-
Bacteria.Proteobacteria.Epsilonproteobacteria.Campylobacterales.Helicobacteraceae	1.98066			-
Bacteria.Proteobacteria.Gammaproteobacteria.Vibrionales	3.04692			-
Bacteria.Firmicutes.Bacilli.Bacillales.Planococcaceae.Solibacillus	4.59745			-
Bacteria.Firmicutes.Erysipelotrichi.Erysipelotrichales.Erysipelotrichaceae	5.17865			-
Bacteria.Actinobacteria.Actinobacteria.Actinomycetales.Dietziaceae.Dietzia	1.8962			-
Bacteria.TM7.TM7_3	3.00622			-
Bacteria.Spirochaetes.Spirochaetes.Spirochaetales.Spirochaetaceae.Treponema	3.9973	D	3.71928	0.016091
Bacteria.Firmicutes.Erysipelotrichi.Erysipelotrichales.Erysipelotrichaceae.Sharpea	3.85512			-
Bacteria.Proteobacteria.Alphaproteobacteria.Rickettsiales.mitochondria.Lupinus	2.50372			-
Bacteria.Proteobacteria.Gammaproteobacteria.Pseudomonadales.Moraxellaceae.Psychrobacter	5.24337			-
Bacteria.Firmicutes.Clostridia.Clostridiales.Peptostreptococcaceae	4.29983			-
Bacteria.Spirochaetes.Spirochaetes.Spirochaetales	3.9973	D	3.70789	0.016091
Bacteria.Verrucomicrobia	4.1307	E	3.84921	0.0310878
Bacteria.Proteobacteria.Betaproteobacteria.Burkholderiales.Comamonadaceae.Methylibium	1.90147			-
Bacteria.Actinobacteria.Actinobacteria.Actinomycetales.Brevibacteriaceae.Brevibacterium	2.50343			-
Bacteria.Firmicutes.Clostridia.Clostridiales.Veillonellaceae.Mitsuokella	3.21954			-
Bacteria.Firmicutes.Clostridia.Clostridiales.Eubacteriaceae.Pseudoramibacter_Eubacterium	2.84615			-
Bacteria._Thermi_	2.48126			-
Bacteria.Proteobacteria	5.51083			-
Bacteria.Actinobacteria.Actinobacteria.Actinomycetales.Microbacteriaceae	2.10559			-
Bacteria.Bacteroidetes.Bacteroidia.Bacteroidales.Bacteroidaceae	3.09705			-
Bacteria.Actinobacteria.Actinobacteria.Actinomycetales.Micrococcaceae.Micrococcus	1.50353			-
Bacteria.Proteobacteria.Alphaproteobacteria.Rhizobiales.Rhizobiaceae	3.07167			-
Bacteria.Firmicutes.Erysipelotrichi.Erysipelotrichales.Erysipelotrichaceae.p_75_a5	2.79253	E	3.36125	0.0388765
Bacteria.Cyanobacteria.4C0d_2.MLE1_12	2.67953			-
Bacteria.Firmicutes.Clostridia.Clostridiales._Mogibacteriaceae_.Mogibacterium	3.23974			-
Bacteria.Verrucomicrobia.Verruco_5	4.04391	E	3.78555	0.0339256
Bacteria.Proteobacteria.Alphaproteobacteria.Rhizobiales.Brucellaceae	4.16573			-
Bacteria.Tenericutes.Mollicutes.Mycoplasmatales.Mycoplasmataceae	1.97959			-
Bacteria.Proteobacteria.Gammaproteobacteria.Xanthomonadales.Xanthomonadaceae	1.90134			-
Bacteria.Tenericutes.Mollicutes.RF39	2.71749			-
Bacteria.Cyanobacteria.4C0d_2.YS2	3.19704			-
Bacteria.Verrucomicrobia.Verruco_5.WCHB1_41	4.04391	E	3.78914	0.0339256
Bacteria.Bacteroidetes.Bacteroidia.Bacteroidales.RF16	3.29682	D	3.09081	0.0316239
Bacteria.Proteobacteria.Gammaproteobacteria.Xanthomonadales	1.90134			-
Bacteria.Firmicutes.Clostridia.Clostridiales.Lachnospiraceae.Roseburia	2.95591	D	3.13907	0.0233547
Bacteria.Proteobacteria.Alphaproteobacteria.Rhizobiales.Rhizobiaceae.Shinella	1.2025			-
Bacteria.Proteobacteria.Alphaproteobacteria	4.26538			-
Bacteria.Firmicutes.Bacilli.Bacillales.Bacillaceae	2.72029			-
Bacteria.Proteobacteria.Betaproteobacteria	4.60555			-
Bacteria.Firmicutes.Clostridia.Clostridiales.Lachnospiraceae.Butyrivibrio	3.50512			-
Bacteria.Proteobacteria.Alphaproteobacteria.Caulobacterales.Caulobacteraceae	2.50353			-
Bacteria.Bacteroidetes.Bacteroidia.Bacteroidales._Paraprevotellaceae_.CF231	3.68792	E	3.35159	0.0172092
Bacteria.Proteobacteria.Betaproteobacteria.Tremblayales	2.37855			-
Bacteria.Firmicutes.Clostridia.Natranaerobiales	2.43413			-
Bacteria.Firmicutes.Clostridia.Clostridiales.Veillonellaceae.Dialister	2.45914			-
Bacteria.Firmicutes.Bacilli.Lactobacillales.Carnobacteriaceae	3.50497			-
Bacteria.Armatimonadetes	2.0476			-
Bacteria.Firmicutes	5.71851			-
Bacteria.Firmicutes.Clostridia.Clostridiales.Lachnospiraceae.Blautia	2.8895			-
Bacteria.Fibrobacteres.Fibrobacteria.Fibrobacterales	2.64665			-
Bacteria.Proteobacteria.Alphaproteobacteria.Rhizobiales.Phyllobacteriaceae.Phyllobacterium	2.0476			-
Bacteria.Proteobacteria.Alphaproteobacteria.Caulobacterales	2.50353			-
Bacteria.Firmicutes.Clostridia.Clostridiales.Lachnospiraceae	4.75837			-
Bacteria.Bacteroidetes.Bacteroidia.Bacteroidales.Porphyromonadaceae.Parabacteroides	3.69172			-
Bacteria.Proteobacteria.Gammaproteobacteria.Alteromonadales	4.3181			-
Bacteria._Thermi_.Deinococci.Thermales	2.48126			-
Bacteria.Bacteroidetes.Flavobacteriia	5.04861			-
Bacteria.Firmicutes.Bacilli.Bacillales.Staphylococcaceae.Staphylococcus	1.90147			-
Bacteria.Actinobacteria.Actinobacteria.Bifidobacteriales	5.56549			-
Bacteria.TM7.TM7_3.CW040.F16	3.00622			-
Bacteria.Proteobacteria.Deltaproteobacteria.Myxococcales.Myxococcaceae	1.90147			-
Bacteria.Bacteroidetes._Saprospirae_	3.21108			-
Bacteria.Actinobacteria.Coriobacteriia	5.1349			-
Bacteria.Proteobacteria.Deltaproteobacteria.Desulfovibrionales.Desulfovibrionaceae.Desulfovibrio	3.75027			-
Bacteria.Firmicutes.Bacilli.Bacillales.Planococcaceae.Lysinibacillus	2.15602			-
Bacteria.Firmicutes.Bacilli.Lactobacillales.Carnobacteriaceae.Carnobacterium	3.49624			-
Bacteria.Cyanobacteria.4C0d_2	3.20141			-
Bacteria.Proteobacteria.Deltaproteobacteria	3.79133			-
Bacteria.Spirochaetes.Spirochaetes.Sphaerochaetales.Sphaerochaetaceae	2.92678			-
Bacteria.Firmicutes.Clostridia.Clostridiales.Clostridiaceae	5.17732			-
Bacteria.Firmicutes.Clostridia.Clostridiales.Veillonellaceae.Phascolarctobacterium	3.50353			-
Bacteria.Bacteroidetes.Flavobacteriia.Flavobacteriales._Weeksellaceae_.Wautersiella	5.04861			-
Bacteria.Bacteroidetes.Bacteroidia.Bacteroidales._Paraprevotellaceae_._Prevotella_	2.98441			-
Bacteria.Firmicutes.Bacilli.Bacillales.Staphylococcaceae	1.90147			-
Bacteria.Proteobacteria.Epsilonproteobacteria.Campylobacterales.Helicobacteraceae.Helicobacter	1.98066			-
Bacteria.Actinobacteria.Actinobacteria.Actinomycetales.Pseudonocardiaceae.Amycolatopsis	3.82151			-
Bacteria.Proteobacteria.Gammaproteobacteria	5.41362			-
Bacteria.Firmicutes.Clostridia.Clostridiales.Lachnospiraceae.Pseudobutyrivibrio	2.10684			-
Bacteria._Thermi_.Deinococci.Thermales.Thermaceae	2.48126			-
Bacteria.Firmicutes.Clostridia.Clostridiales.Veillonellaceae.Selenomonas	2.95838			-
Bacteria.Verrucomicrobia.Verrucomicrobiae.Verrucomicrobiales.Verrucomicrobiaceae.Akkermansia	3.38872	E	3.23597	0.0311438
Bacteria.Spirochaetes.Spirochaetes.Sphaerochaetales.Sphaerochaetaceae.Sphaerochaeta	2.92678			-
Bacteria.Synergistetes.Synergistia.Synergistales	2.28169			-
Bacteria.TM7	3.00622			-
Bacteria.Firmicutes.Clostridia.Clostridiales.Lachnospiraceae._Ruminococcus_	2.90739			-
Bacteria.Bacteroidetes._Saprospirae_._Saprospirales_	3.21108			-
Bacteria.Fibrobacteres.Fibrobacteria.Fibrobacterales.Fibrobacteraceae	2.64665			-
Bacteria.Proteobacteria.Gammaproteobacteria.Enterobacteriales.Enterobacteriaceae	3.12111			-
Bacteria.Tenericutes.Mollicutes.Mycoplasmatales.Mycoplasmataceae.Mycoplasma	1.97959			-
Bacteria.Firmicutes.Erysipelotrichi	5.17865			-
Bacteria.Actinobacteria.Coriobacteriia.Coriobacteriales.Coriobacteriaceae	5.1349			-
Bacteria.Firmicutes.Bacilli.Turicibacterales.Turicibacteraceae.Turicibacter	3.97599			-
Bacteria.Proteobacteria.Gammaproteobacteria.Vibrionales.Pseudoalteromonadaceae	3.04692			-
Bacteria.Firmicutes.Bacilli.Turicibacterales	3.97599			-
Bacteria.Bacteroidetes.Bacteroidia.Bacteroidales.p_2534_18B5	2.47913	D	3.34948	0.0458382
Bacteria.Tenericutes.Mollicutes	2.71749			-
Bacteria.Fibrobacteres	2.64665			-
Bacteria.Proteobacteria.Gammaproteobacteria.Pseudomonadales.Moraxellaceae	5.37124			-
Bacteria.Actinobacteria.Actinobacteria.Actinomycetales.Micrococcaceae.Kocuria	2.75526			-
Bacteria.Proteobacteria.Alphaproteobacteria.Sphingomonadales.Sphingomonadaceae	2.73396			-
Bacteria.Cyanobacteria.Chloroplast.Streptophyta	4.48311			-
Bacteria.TM7.TM7_3.CW040	3.00622			-
Bacteria.Actinobacteria.Actinobacteria.Actinomycetales.Corynebacteriaceae.Corynebacterium	2.69441			-
Bacteria.Bacteroidetes.Bacteroidia.Bacteroidales	5.06462			-
Bacteria.Firmicutes.Bacilli.Lactobacillales.Leuconostocaceae	2.50358			-
Bacteria.Planctomycetes	2.04741			-
Bacteria.Proteobacteria.Gammaproteobacteria.Pasteurellales	1.20147			-
Bacteria.Proteobacteria.Gammaproteobacteria.Pasteurellales.Pasteurellaceae	1.20147			-
Bacteria.Actinobacteria.Actinobacteria.Actinomycetales.Micrococcaceae	2.88982			-
Bacteria.Bacteroidetes.Bacteroidia.Bacteroidales._Paraprevotellaceae_	3.75237	D	3.50152	0.0184918
Bacteria.Firmicutes.Clostridia.Clostridiales.Clostridiaceae.Sarcina	2.99817			-
Bacteria.Actinobacteria.Coriobacteriia.Coriobacteriales.Coriobacteriaceae.Collinsella	3.12555			-
Bacteria.Proteobacteria.Epsilonproteobacteria.Campylobacterales	1.98066			-
Bacteria.Firmicutes.Bacilli	5.08643			-
Bacteria.Acidobacteria.Solibacteres.Solibacterales	1.67963			-
Bacteria.Firmicutes.Bacilli.Lactobacillales.Aerococcaceae	1.50196			-
Bacteria.Proteobacteria.Alphaproteobacteria.Sphingomonadales	2.78227			-
Bacteria.Bacteroidetes.Bacteroidia.Bacteroidales.Prevotellaceae	4.99976			-
Bacteria.Tenericutes	2.71749			-
Bacteria.Proteobacteria.Deltaproteobacteria.Myxococcales	1.90147			-
Bacteria.Synergistetes.Synergistia	2.28169			-
Bacteria.Firmicutes.Clostridia.Clostridiales	5.5599			-
Bacteria.Verrucomicrobia.Verrucomicrobiae.Verrucomicrobiales.Verrucomicrobiaceae	3.38872	E	3.22152	0.0311438
Bacteria.Actinobacteria.Coriobacteriia.Coriobacteriales	5.1349			-
Bacteria.Firmicutes.Bacilli.Lactobacillales.Streptococcaceae.Lactococcus	1.98065			-
Bacteria.Actinobacteria.Coriobacteriia.Coriobacteriales.Coriobacteriaceae.Slackia	2.15508			-
Bacteria.Proteobacteria.Gammaproteobacteria.Pseudomonadales.Moraxellaceae.Moraxella	1.981			-
Bacteria.Bacteroidetes._Saprospirae_._Saprospirales_.Chitinophagaceae	3.21108			-
Bacteria.Armatimonadetes._Fimbriimonadia_._Fimbriimonadales_._Fimbriimonadaceae_	2.0476			-
Bacteria.Proteobacteria.Gammaproteobacteria.Vibrionales.Pseudoalteromonadaceae.Pseudoalteromonas	3.04692			-
Bacteria.Firmicutes.Erysipelotrichi.Erysipelotrichales.Erysipelotrichaceae.Allobaculum	5.17585			-
Bacteria.Lentisphaerae	2.70765			-
Bacteria.Verrucomicrobia.Verruco_5.WCHB1_41.WCHB1_25	2.15617			-
Bacteria.Firmicutes.Clostridia.Clostridiales.Lachnospiraceae.Shuttleworthia	3.48187			-
Bacteria.Bacteroidetes.Flavobacteriia.Flavobacteriales	5.04861			-
Bacteria.Actinobacteria.Actinobacteria.Actinomycetales.Propionibacteriaceae.Propionibacterium	1.98066			-
Bacteria.Lentisphaerae._Lentisphaeria_	2.70765			-
Bacteria.OD1.ZB2	1.90134			-
Bacteria.Firmicutes.Bacilli.Bacillales	4.68308			-
Bacteria.Proteobacteria.Deltaproteobacteria.Desulfovibrionales.Desulfovibrionaceae.Bilophila	2.20406			-
Bacteria.Proteobacteria.Alphaproteobacteria.Rickettsiales	2.8754			-
Bacteria.Proteobacteria.Alphaproteobacteria.Rhizobiales.Phyllobacteriaceae.Aminobacter	2.54493			-
Bacteria.Fibrobacteres.Fibrobacteria.Fibrobacterales.Fibrobacteraceae.Fibrobacter	2.64665			-
Bacteria.Verrucomicrobia.Verrucomicrobiae	3.38872	E	3.24332	0.0311438
Bacteria.Actinobacteria.Actinobacteria.Actinomycetales.Pseudonocardiaceae.Saccharopolyspora	1.19926			-
Bacteria.Proteobacteria.Alphaproteobacteria.Rhizobiales.Bradyrhizobiaceae	2.67956			-
Bacteria.Actinobacteria.Actinobacteria.Actinomycetales.Propionibacteriaceae	1.98066			-
Bacteria.Bacteroidetes.Bacteroidia	5.06462			-
Bacteria.Bacteroidetes.Bacteroidia.Bacteroidales.Prevotellaceae.Prevotella	4.99969			-
Bacteria.Firmicutes.Clostridia.Clostridiales.Dehalobacteriaceae.Dehalobacterium	1.89792			-
Bacteria.Proteobacteria.Betaproteobacteria.Burkholderiales.Alcaligenaceae	4.59266			-
Bacteria.Proteobacteria.Alphaproteobacteria.Rhizobiales.Hyphomicrobiaceae	1.50353			-
Bacteria.Firmicutes.Bacilli.Lactobacillales	5.06803			-
Bacteria.Armatimonadetes._Fimbriimonadia_._Fimbriimonadales_._Fimbriimonadaceae_.Fimbriimonas	2.0476			-
Bacteria.Cyanobacteria.Chloroplast	4.48311			-
Bacteria.Actinobacteria.Actinobacteria.Actinomycetales.Brevibacteriaceae	2.50343			-
Bacteria.Firmicutes.Bacilli.Lactobacillales.Lactobacillaceae	5.06583			-
Bacteria.Proteobacteria.Deltaproteobacteria.Desulfovibrionales.Desulfovibrionaceae	3.7857			-
Bacteria.Firmicutes.Clostridia.Clostridiales.Veillonellaceae	4.72625			-
Bacteria.Firmicutes.Clostridia	5.56359			-
Bacteria.Firmicutes.Clostridia.Clostridiales.Lachnospiraceae.Coprococcus	3.65172			-
Bacteria.Proteobacteria.Gammaproteobacteria.Aeromonadales.Succinivibrionaceae	3.08512			-
Bacteria.Synergistetes	2.28169			-
Bacteria.Tenericutes.Mollicutes.Mycoplasmatales	1.97959			-
Bacteria.Firmicutes.Clostridia.Clostridiales.Clostridiaceae.Clostridium	4.32101			-
Bacteria.Bacteroidetes._Saprospirae_._Saprospirales_.Chitinophagaceae.Sediminibacterium	3.21108			-
Bacteria.Fibrobacteres.Fibrobacteria	2.64665			-
Bacteria.Proteobacteria.Gammaproteobacteria.Aeromonadales	3.08512			-
Bacteria.Proteobacteria.Alphaproteobacteria.Rickettsiales.mitochondria.Zea	2.63512			-
Bacteria.Proteobacteria.Gammaproteobacteria.Alteromonadales.Shewanellaceae.Shewanella	4.3181			-
Bacteria.Acidobacteria	1.67963			-
Bacteria.Actinobacteria.Actinobacteria.Actinomycetales.Micrococcaceae.Rothia	2.3132			-
Bacteria.Bacteroidetes.Bacteroidia.Bacteroidales.BS11	2.85322	D	2.93973	0.0438538
Bacteria.Spirochaetes.Spirochaetes.Sphaerochaetales	2.92678			-
Bacteria.Firmicutes.Bacilli.Lactobacillales.Leuconostocaceae.Leuconostoc	2.50358			-
Bacteria.Bacteroidetes.Bacteroidia.Bacteroidales.Porphyromonadaceae.Paludibacter	2.38037			-
Bacteria.Verrucomicrobia.Verrucomicrobiae.Verrucomicrobiales	3.38872	E	3.22207	0.0311438
Bacteria.Proteobacteria.Alphaproteobacteria.Rickettsiales.mitochondria	2.8754			-
Bacteria.Bacteroidetes.Sphingobacteriia.Sphingobacteriales	1.20182			-
Bacteria.Proteobacteria.Gammaproteobacteria.Alteromonadales.Shewanellaceae	4.3181			-
Bacteria.Proteobacteria.Betaproteobacteria.Burkholderiales	4.60297			-
Bacteria.Proteobacteria.Betaproteobacteria.Burkholderiales.Alcaligenaceae.Sutterella	4.59266			-
Bacteria.Firmicutes.Erysipelotrichi.Erysipelotrichales.Erysipelotrichaceae._Eubacterium_	2.2409			-
Bacteria.Proteobacteria.Gammaproteobacteria.Aeromonadales.Succinivibrionaceae.Succinivibrio	2.88558			-
Bacteria.Firmicutes.Clostridia.Clostridiales.Lachnospiraceae.Epulopiscium	3.87565			-
Bacteria.Bacteroidetes.Sphingobacteriia	1.20182			-
Bacteria.Firmicutes.Clostridia.Clostridiales.Veillonellaceae.Megasphaera	4.60691			-
Bacteria.Bacteroidetes.Bacteroidia.Bacteroidales.Porphyromonadaceae	3.69867			-
Bacteria.Actinobacteria	5.66908			-
Bacteria.Synergistetes.Synergistia.Synergistales.Synergistaceae.Synergistes	2.24339			-
Bacteria	6			-
