# Supplementary material for: Characterization of the bacterial microbiota composition and evolution at different intestinal tract in wild pigs (Sus scrofa ussuricus)
Source: PeerJ. 2020 May 26;8:e9124. doi: 10.7717/peerj.9124 (PMC7258971; doi:10.7717/peerj.9124)
Supplement: Table S7 [file peerj-08-9124-s007.xlsx]

## Sheet: 工作表1
Table S7. Predicted KEGG genes of the gut microbiota in five gut segements in wild pigs
Gene ID	KEGG_Description	DU1	DU2	DU3	JE1	JE2	JE3	IL1	IL2	IL3	CE1	CE2	CE3	CO1	CO2	CO3
K01361	lactocepin [EC:3.4.21.96]	722	236	747	173	120	1125	15	715	508	2	5	7	4	20	82
K01362	None	8414	4140	8887	3402	6492	4656	3982	11109	6630	3294	2410	9129	3694	4932	6809
K02249	competence protein ComGG	0	0	0	0	0	0	0	0	0	0	0	0	0	0	3
K05841	sterol 3beta-glucosyltransferase [EC:2.4.1.173]	960	16	727	4	3	95	0	24	86	2	1	1	1	3	1
K05844	ribosomal protein S6 modification protein	33	14	67	21	912	21	7	84	527	2	3	14	3	4	3300
K05845	osmoprotectant transport system substrate-binding protein	1111	178	1154	808	1243	630	188	1214	427	76	108	288	177	188	194
K05846	osmoprotectant transport system permease protein	2517	2460	8279	2901	3325	8260	973	6858	3944	1040	1129	4896	1014	3105	1406
K05847	osmoprotectant transport system ATP-binding protein	2440	2381	8163	3517	2558	7399	1783	6063	3595	2683	3088	5048	2714	4760	1889
K00508	linoleoyl-CoA desaturase [EC:1.14.19.3]	24	11	74	32	317	63	29	175	43	10	6	7	291	6	70
K00500	phenylalanine-4-hydroxylase [EC:1.14.16.1]	213	8	42	27	4766	31	2803	191	3685	1	2	1	3	2	23
K00507	stearoyl-CoA desaturase (delta-9 desaturase) [EC:1.14.19.1]	3107	53	2252	74	4430	323	2821	366	3963	10	37	12	26	33	143
K00504	peptidylglycine monooxygenase [EC:1.14.17.3]	0	0	0	0	0	0	0	1	0	0	0	0	0	0	0
K00505	tyrosinase [EC:1.14.18.1]	2	0	3	0	294	1	0	1	2	0	0	0	0	0	0
K01101	4-nitrophenyl phosphatase [EC:3.1.3.41]	1431	691	2831	3130	720	3248	1457	2197	1599	1986	2305	954	2252	2137	1471
K01103	6-phosphofructo-2-kinase / fructose-2,6-bisphosphatase [EC:2.7.1.105 3.1.3.46];fructose-2,6-bisphosphatase [EC:3.1.3.46]	21	114	44	2	1	3	0	358	7	3	4	1	3	6	1
K01104	protein-tyrosine phosphatase [EC:3.1.3.48]	25743	22760	31633	33331	25075	33738	20480	21053	25376	17345	26852	18164	29859	23205	19022
K05592	ATP-dependent RNA helicase DeaD [EC:3.6.4.13];ATP-dependent RNA helicase DeaD	3633	3408	3912	2618	1834	3109	688	6905	2080	2174	1530	4236	2512	2636	3001
K05593	aminoglycoside 6-adenylyltransferase [EC:2.7.7.-]	158	309	568	415	232	455	397	629	197	263	304	482	378	239	701
K05590	ATP-dependent RNA helicase SrmB [EC:2.7.7.-]	19	16	23	3	1	3	0	24	161	0	1	2	0	0	2
K05591	ATP-independent RNA helicase DbpA [EC:3.6.4.13];ATP-independent RNA helicase DbpA	22	4	40	9	903	11	0	69	199	0	0	3	2	1	2
K05596	LysR family transcriptional regulator, chromosome initiation inhibitor	34	18	174	93	1201	103	14	772	281	3	6	5	4	9	34
K05597	glutamin-(asparagin-)ase [EC:3.5.1.38]	6	2	12	5	802	5	0	48	36	0	1	0	1	1	24
K05594	ElaB protein	5	0	22	2	1	3	0	1	1	0	0	2	0	0	1
K05595	multiple antibiotic resistance protein	1521	382	1107	337	8379	320	4293	3888	7241	423	274	668	1095	336	5935
K05599	anthranilate 1,2-dioxygenase (deaminating, decarboxylating) large subunit [EC:1.14.12.1]	5	1	4	0	586	2	0	2	34	0	0	0	0	1	23
K11962	urea transport system ATP-binding protein	959	11	717	2	0	90	0	10	84	2	0	1	1	2	0
K14540	ribosome biogenesis GTPase A	4360	2587	6516	4566	5454	5921	4663	5723	6537	3859	5555	7826	4286	6191	4731
K12529	putative selenate reductase FAD-binding subunit	134	941	3627	38	394	4484	13	978	1972	8	95	6	4	507	29
K12528	putative selenate reductase molybdopterin-binding subunit	134	940	3627	38	393	4483	13	977	1971	8	95	6	4	507	29
K02456	general secretion pathway protein G	81	76	200	91	1620	78	24	642	267	84	112	151	232	82	166
K02457	general secretion pathway protein H	28	7	68	23	1255	32	1	177	214	0	2	4	2	3	4
K02454	general secretion pathway protein E	492	559	241	112	6305	66	2822	1484	3762	87	134	88	173	174	355
K02455	general secretion pathway protein F	41	14	93	33	1580	41	13	261	231	3	4	7	6	12	57
K02452	general secretion pathway protein C	29	5	50	16	1097	22	12	114	218	0	2	4	1	2	53
K02453	general secretion pathway protein D	73	89	162	69	1602	66	21	754	261	9	41	17	34	49	110
K02450	general secretion pathway protein A	6	2	10	4	105	2	0	34	163	1	0	0	1	0	0
K02103	GntR family transcriptional regulator, arabinose operon transcriptional repressor	179	200	486	487	80	432	80	423	212	347	480	604	356	380	778
K08138	MFS transporter, SP family, xylose:H+ symportor	36	51	21	1	1	22	0	44	15	34	34	64	56	41	21
K02108	F-type H+-transporting ATPase subunit a [EC:3.6.3.14]	9872	10105	15729	13355	11547	15573	9491	13376	11992	9345	12879	10064	13542	12220	9356
K02109	F-type H+-transporting ATPase subunit b [EC:3.6.3.14]	10935	10302	16799	13461	11618	15925	9504	14057	12201	9445	12985	10208	13632	12315	9488
K02458	general secretion pathway protein I	34	9	76	23	1554	35	12	207	227	1	3	4	2	4	56
K02459	general secretion pathway protein J	32	7	69	23	1552	32	12	193	227	0	2	4	2	3	55
K08137	MFS transporter, SP family, galactose:H+ symporter	13	1	22	4	1	3	0	0	1	0	0	2	0	0	1
K03851	taurine-pyruvate aminotransferase [EC:2.6.1.77]	10	57	20	0	0	1	1	169	3	2	2	1	1	3	0
K03852	sulfoacetaldehyde acetyltransferase [EC:2.3.3.15]	12	67	136	72	79	69	6	833	65	3	6	2	3	9	5
K03855	ferredoxin like protein	45	55	42	100	8	12	78	1316	8	112	26	151	51	54	67
K03856	3-deoxy-7-phosphoheptulonate synthase [EC:2.5.1.54]	2849	3281	8766	3521	1872	8046	1912	8089	3799	4046	5901	8406	4548	7096	4199
K13018	UDP-D-GlcNAc3NA acetyltransferase [EC:2.3.1.-]	0	1	4	1	1	1	0	8	1	0	0	0	0	0	0
K13019	UDP-GlcNAc3NAcA epimerase [EC:5.1.3.23]	31	25	58	15	2	22	5	91	14	9	12	35	4	21	19
K13010	perosamine synthetase	0	1	8	2	0	2	0	21	0	0	0	4	1	0	1
K13011	O-antigen biosynthesis protein WbqL	0	0	2	0	0	0	0	4	0	0	0	0	0	0	0
K13012	O-antigen biosynthesis protein WbqP	309	451	1271	2258	649	1199	1223	1453	532	2328	2523	2035	2578	2774	926
K13013	O-antigen biosynthesis protein WbqV	1	3	19	10	9	12	0	83	7	0	1	1	0	1	1
K13014	undecaprenyl phosphate-alpha-L-ara4FN deformylase [EC:3.5.-.-]	16	3	25	2	799	5	0	11	35	0	0	3	0	1	1
K13015	UDP-N-acetyl-D-glucosamine dehydrogenase [EC:1.1.1.-]	16	30	28	12	9	10	1	182	8	93	116	89	172	147	271
K13016	UDP-D-GlcNAcA oxidase [EC:1.1.1.-]	202	1	3	2	3852	5	2801	2	3478	1	0	0	0	0	17
K13017	UDP-3-keto-D-GlcNAcA aminotransferase [EC:2.6.1.-]	202	1	7	3	3852	5	2801	9	3479	1	0	0	0	0	18
K08566	plasminogen activator [EC:3.4.23.48]	6	1	0	0	0	0	0	0	0	0	0	0	0	0	0
K08567	hydrogenase 2 maturation protease [EC:3.4.24.-]	10	19	30	2	0	18	2	9	10	18	16	28	64	19	40
K13275	major intracellular serine protease [EC:3.4.21.-]	7	8	29	14	12	10	6	2	8	1	8	49	1	21	79
K13276	bacillopeptidase F [EC:3.4.21.-]	0	0	1	1	0	0	0	0	0	0	0	0	0	0	4
K03275	UDP-glucose:(glucosyl)LPS alpha-1,3-glucosyltransferase [EC:2.4.1.-]	2	0	22	3	0	3	0	0	0	0	0	2	0	0	1
K03274	ADP-L-glycero-D-manno-heptose 6-epimerase [EC:5.1.3.20]	301	708	184	152	35	36	79	3009	28	123	34	160	60	71	56
K03277	heptosyltransferase IV [EC:2.4.-.-]	0	0	0	1	0	0	0	0	0	0	0	0	0	0	0
K03276	UDP-glucose/galactose:(glucosyl)LPS alpha-1,2-glucosyl/galactosyltransferase [EC:2.4.1.-]	0	0	1	0	0	0	0	0	0	0	0	0	0	0	0
K03271	phosphoheptose isomerase [EC:5.-.-.-]	452	945	1246	1631	1442	699	1084	3782	379	2049	2387	961	2185	2209	663
K03270	3-deoxy-D-manno-octulosonate 8-phosphate phosphatase (KDO 8-P phosphatase) [EC:3.1.3.45]	1160	2344	560	197	5104	328	2920	4538	3847	1116	414	1627	1051	740	3268
K03273	D-glycero-D-manno-heptose 1,7-bisphosphate phosphatase [EC:3.1.3.-]	1291	752	1063	185	952	202	87	3139	387	205	177	234	169	191	671
K03272	D-beta-D-heptose 7-phosphate kinase / D-beta-D-heptose 1-phosphate adenosyltransferase [EC:2.7.1.- 2.7.7.-]	550	1251	508	145	1833	256	10	2945	513	140	195	154	223	221	320
K03279	UDP-glucose:(galactosyl)LPS alpha-1,2-glucosyltransferase [EC:2.4.1.58]	1	0	21	2	0	3	0	0	1	0	0	2	0	0	1
K12276	MSHA biogenesis protein MshE	1	1	4	1	0	1	0	14	162	0	0	0	0	0	0
K12270	accessory secretory protein Asp3	159	120	669	1504	384	282	1001	429	152	1807	2116	662	1976	1945	367
K12279	MSHA biogenesis protein MshI	1	1	4	1	0	1	0	15	162	0	0	0	0	0	0
K12278	MSHA biogenesis protein MshG	1	1	4	1	0	1	0	14	162	0	0	0	0	0	0
K07557	archaeosine tRNA-ribosyltransferase [EC:2.4.2.-]	0	0	0	0	0	1	0	0	0	0	0	0	2	0	0
K07552	MFS transporter, DHA1 family, bicyclomycin/chloramphenicol resistance protein	776	911	770	538	5759	375	3033	6670	4168	1074	262	1460	862	610	3183
K09909	hypothetical protein	214	2	29	5	4150	11	2814	23	3812	1	1	3	1	1	70
K09908	hypothetical protein	24	17	26	3	901	5	0	29	36	0	1	3	0	1	2
K12057	conjugal transfer pilus assembly protein TraF	90	11	101	5	4	23	0	79	52	1	3	2	6	4	3
K12056	conjugal transfer mating pair stabilization protein TraG	2	3	31	5	4	11	0	59	50	0	1	3	2	2	2
K06221	2,5-diketo-D-gluconate reductase A [EC:1.1.1.274]	43	63	97	29	18	45	11	249	30	4	8	7	3	13	14
K09900	hypothetical protein	9	1	22	2	0	3	0	1	161	0	0	2	0	0	1
K09903	uridylate kinase [EC:2.7.4.22]	9769	9977	14860	11839	11119	15134	8484	12454	11747	7773	10987	9686	12063	10458	9393
K09902	hypothetical protein	233	19	13	6	5050	10	2814	54	3688	1	1	0	1	1	70
K09904	hypothetical protein	14	1	22	3	1	3	0	2	161	0	0	2	0	0	1
K09907	hypothetical protein	14	2	22	3	1	3	0	2	161	0	0	2	0	0	1
K09906	hypothetical protein	226	18	30	6	4150	11	2814	45	3492	1	1	3	1	1	70
K03234	elongation factor EF-2 [EC:3.6.5.3];elongation factor 2	0	0	0	0	1	2	0	0	0	1	0	0	3	0	1
K00773	queuine tRNA-ribosyltransferase [EC:2.4.2.29]	8646	9700	13470	10889	10926	13242	8400	12539	10707	7826	11027	9723	12088	10574	9172
K00772	5'-methylthioadenosine phosphorylase [EC:2.4.2.28]	1260	679	907	183	1196	146	90	2881	172	141	78	202	107	104	136
K00777	None	0	0	7	2	2	2	0	52	4	0	0	1	2	0	0
K06313	spore germination protein	31	63	70	6	20	84	3	270	60	415	229	1165	450	548	776
K06315	transcriptional regulator of the spore photoproduct lyase operon	0	0	1	1	0	0	0	0	0	0	0	0	0	0	4
K05574	NADH dehydrogenase I subunit 3 [EC:1.6.5.3];NAD(P)H-quinone oxidoreductase subunit 3 [EC:1.6.5.3]	959	11	717	2	0	90	0	10	84	2	0	1	1	2	0
K10201	N-acetylglucosamine transport system permease protein	5	13	34	6	2	86	0	14	27	11	9	14	5	14	3
K07177	PDZ domain-containing protein	5671	4876	5455	8394	4152	5927	3862	1622	3980	2730	4892	173	6621	2873	2271
K07174	Mn2+-dependent serine/threonine protein kinase [EC:2.7.1.-]	0	0	0	0	0	1	0	0	0	0	0	0	2	0	0
K07175	PhoH-like ATPase	341	628	265	202	935	114	103	2336	281	179	140	277	461	150	249
K07172	None	985	73	839	26	7	140	5	130	119	101	145	199	238	103	68
K07173	S-ribosylhomocysteine lyase [EC:4.4.1.21]	7219	8444	11929	10261	5397	12565	5374	7176	6650	6023	10008	6263	10176	8814	7620
K07170	GAF domain-containing protein	1650	2948	5379	2361	5357	6419	2647	3552	6112	2730	2508	1986	2929	3149	3961
K07171	None	6178	3958	13342	5786	2293	11754	2063	7880	5751	5473	8663	13220	5992	9985	7564
K07178	RIO kinase 1 [EC:2.7.11.1]	9	3	15	6	904	11	0	53	201	1	0	0	3	1	1
K00194	acetyl-CoA decarbonylase/synthase complex subunit delta;carbon-monoxide dehydrogenase delta subunit [EC:1.2.99.2]	365	239	416	310	371	1621	74	497	441	39	94	312	26	205	43
K00197	carbon-monoxide dehydrogenase gamma subunit [EC:1.2.99.2];acetyl-CoA decarbonylase/synthase complex subunit gamma [EC:2.1.1.-]	365	244	419	311	371	1622	74	509	443	56	118	332	59	221	107
K00196	carbon-monoxide dehydrogenase iron sulfur subunit	0	0	0	0	0	1	0	0	0	0	0	0	2	0	0
K00190	carbon monoxide dehydrogenase / acetyl-CoA synthase subunit beta [EC:1.2.7.4 1.2.99.2 2.3.1.169]	0	2	0	0	0	0	0	2	0	1	3	1	3	0	13
K00198	carbon-monoxide dehydrogenase catalytic subunit [EC:1.2.99.2]	1275	1032	2350	1041	576	2333	386	2913	995	1312	1106	5642	1033	2874	1137
K06405	stage V sporulation protein AC	1619	1456	3060	1436	785	2443	619	3543	1121	1939	3183	6736	2051	3977	3503
K10109	maltose/maltodextrin transport system permease protein	5899	5163	5841	8284	4223	5988	4047	2175	4036	3088	5223	834	7049	3109	2269
K10108	maltose/maltodextrin transport system substrate-binding protein	6119	5350	6294	8353	4233	6334	3930	2542	4211	3424	5607	1567	7399	3671	2836
K10107	capsular polysaccharide transport system permease protein	11	58	42	13	13	14	2	252	11	2	4	1	2	5	2
K01828	None	10	2	16	10	5	16	10	26	10	0	1	0	0	1	0
K01829	protein disulfide-isomerase [EC:5.3.4.1]	3	6	13	9	4	9	0	87	4	0	0	0	0	0	0
K01826	5-carboxymethyl-2-hydroxymuconate isomerase [EC:5.3.3.10]	237	13	51	15	5548	66	2815	120	3583	1	2	1	1	3	70
K01825	3-hydroxyacyl-CoA dehydrogenase / enoyl-CoA hydratase / 3-hydroxybutyryl-CoA epimerase / enoyl-CoA isomerase [EC:1.1.1.35 4.2.1.17 5.1.2.3 5.3.3.8]	911	30	131	24	19827	50	11258	130	14747	4	3	11	3	4	280
K01822	steroid delta-isomerase [EC:5.3.3.1]	966	14	730	10	5	101	3	39	91	2	2	1	2	3	2
K01823	isopentenyl-diphosphate delta-isomerase [EC:5.3.3.2]	2335	523	2639	1532	331	2528	207	1109	1448	71	78	77	534	47	3407
K01820	None	10	14	117	71	82	69	6	677	65	6	5	5	9	14	5
K01821	4-oxalocrotonate tautomerase [EC:5.3.2.-]	1246	346	1780	1515	892	2126	189	1104	1241	53	80	48	237	49	1475
K00999	CDP-diacylglycerol--inositol 3-phosphatidyltransferase [EC:2.7.8.11]	0	0	0	0	1	2	0	0	0	0	0	0	0	0	0
K00998	phosphatidylserine synthase [EC:2.7.8.8]	1943	3104	1748	971	6529	1919	3234	7170	4668	2194	2769	4111	2546	2646	6023
K00995	CDP-diacylglycerol--glycerol-3-phosphate 3-phosphatidyltransferase [EC:2.7.8.5]	20015	18895	28101	27125	20337	26982	16452	17449	18770	14083	23615	15103	26010	19965	12173
K00997	holo-[acyl-carrier protein] synthase [EC:2.7.8.7]	6926	6855	10601	8512	5022	11425	4163	6395	6331	3590	5805	3063	7592	4951	2833
K00996	undecaprenyl-phosphate galactose phosphotransferase [EC:2.7.8.6]	53	141	38	194	148	25	5	803	22	7	19	5	10	46	4
K00991	2-C-methyl-D-erythritol 4-phosphate cytidylyltransferase [EC:2.7.7.60]	9019	11677	17288	10428	11262	17887	8369	11982	12794	7979	11574	10213	12329	11766	6935
K00990	[protein-PII] uridylyltransferase [EC:2.7.7.59]	4611	4483	3786	7073	8958	3600	6563	2981	6385	2798	4855	293	6457	2908	1382
K00992	None	9	24	71	24	9	18	4	102	13	5	8	23	8	6	78
K02622	topoisomerase IV subunit B [EC:5.99.1.-]	2328	2400	3050	3426	5998	3262	4309	4955	5368	3007	2658	2400	3428	2902	4679
K03564	peroxiredoxin Q/BCP [EC:1.11.1.15]	8716	6819	8040	9167	9662	5627	7866	6447	7437	6028	7771	3707	9855	6312	5932
K13489	chemotaxis-related protein WspD	11	2	11	4	803	5	1	30	34	2	1	2	5	8	1
K13488	chemotaxis-related protein WspB	11	2	11	4	803	5	1	30	34	2	1	2	5	8	1
K13483	xanthine dehydrogenase YagT iron-sulfur-binding subunit	210	13	92	68	4553	72	2807	401	3521	2	8	1	1	7	23
K13482	xanthine dehydrogenase large subunit [EC:1.17.1.4]	18	23	173	95	994	107	14	809	124	3	8	3	5	10	31
K13481	xanthine dehydrogenase small subunit [EC:1.17.1.4]	18	22	173	95	994	107	14	808	124	3	8	3	5	10	31
K13480	xanthine dehydrogenase iron-sulfur-binding subunit	1	0	22	2	0	3	0	1	0	0	0	2	0	0	1
K13487	methyl-accepting chemotaxis protein WspA	11	2	9	3	803	5	1	26	34	2	1	2	5	8	1
K13486	chemotaxis protein methyltransferase WspC	11	2	11	4	803	5	1	30	34	2	1	2	5	8	1
K14680	RNA ligase [EC:6.5.1.3]	0	0	3	0	2	2	0	14	3	0	0	0	0	0	0
K14682	amino-acid N-acetyltransferase [EC:2.3.1.1]	258	42	65	19	5058	23	2816	231	3691	146	158	188	340	166	293
K08358	tetrathionate reductase subunit B	17	57	20	0	0	2	0	192	21	1	2	1	1	4	1
K08357	tetrathionate reductase subunit A	17	57	19	0	0	2	0	192	21	1	2	1	1	4	1
K08356	arsenite oxidase large subunit [EC:1.20.98.1]	0	0	0	0	0	0	0	21	1	0	0	0	0	0	0
K08355	arsenite oxidase small subunit [EC:1.20.98.1]	0	0	0	0	0	0	0	21	1	0	0	0	0	0	0
K03469	ribonuclease HI [EC:3.1.26.4]	9339	9669	13764	10106	6479	13782	4578	11516	7709	5850	8729	8646	9806	8300	9442
K03462	nicotinamide phosphoribosyltransferase [EC:2.4.2.12]	0	0	0	0	0	1	0	0	2	0	0	0	2	0	0
K03464	muconolactone D-isomerase [EC:5.3.3.4]	14	4	19	10	892	19	17	50	54	0	2	1	0	1	51
K03465	thymidylate synthase (FAD) [EC:2.1.1.148]	1522	675	1701	651	338	790	227	1601	509	527	694	1935	622	1233	1005
K03466	DNA segregation ATPase FtsK/SpoIIIE, S-DNA-T family	13236	14488	18196	18876	15138	19159	12219	14805	14658	10757	15979	10798	18815	13793	11447
K01648	ATP citrate (pro-S)-lyase [EC:2.3.3.8]	0	1	0	0	3	0	0	0	0	1	0	0	0	0	0
K01649	2-isopropylmalate synthase [EC:2.3.3.13]	9000	7702	9184	8864	10151	7134	7140	10629	8184	6538	9132	10439	10764	8541	6762
K01643	citrate lyase subunit alpha / citrate CoA-transferase [EC:4.1.3.6 2.8.3.10];citrate lyase subunit alpha [EC:4.1.3.6]	2124	1039	3188	2278	568	3437	571	2272	2078	554	563	1249	714	782	1400
K01640	hydroxymethylglutaryl-CoA lyase [EC:4.1.3.4]	234	65	195	121	5263	125	2825	1027	3777	26	23	23	43	30	1029
K01641	hydroxymethylglutaryl-CoA synthase [EC:2.3.3.10]	1342	480	1857	1504	338	2411	188	797	1340	46	65	36	221	33	505
K01646	citrate lyase subunit gamma [EC:4.1.3.6]	1276	547	1712	1248	329	2007	364	1824	1139	236	232	297	262	223	638
K01647	citrate synthase [EC:2.3.3.1]	8510	8841	13469	10409	11099	14184	8089	11301	10846	7877	11390	9644	12366	10825	9416
K01644	citrate lyase subunit beta [EC:4.1.3.6];citrate lyase subunit beta / citryl-CoA lyase [EC:4.1.3.6 4.1.3.34]	2654	1255	3884	2656	9854	3894	6256	5069	9455	571	644	1308	682	860	1588
K02597	nitrogen fixation protein NifZ	8	3	20	10	7	9	1	78	6	0	0	0	2	0	1
K02626	arginine decarboxylase [EC:4.1.1.19]	0	2	0	0	0	1	0	2	0	2	3	1	4	0	14
K02595	nitrogen fixation protein NifW	2	2	13	6	6	7	1	56	5	0	0	0	0	0	1
K02594	homocitrate synthase NifV	132	141	269	61	45	152	25	516	107	438	284	1323	481	623	467
K02593	nitrogen fixation protein NifT	8	3	13	6	6	6	1	56	5	0	0	0	0	0	1
K02592	nitrogenase molybdenum-iron protein NifN	70	95	154	24	30	116	8	420	81	421	239	1203	449	567	358
K02591	nitrogenase molybdenum-iron protein beta chain [EC:1.18.6.1]	167	232	299	51	60	229	16	925	161	953	595	2531	1092	1296	947
K02590	nitrogen regulatory protein PII 2	176	236	437	75	61	353	15	718	179	548	350	1386	556	665	519
K02598	nitrite transporter NirC	832	967	875	663	516	1782	145	1812	538	179	187	1101	91	551	123
K02849	heptosyltransferase III [EC:2.4.-.-]	63	55	42	104	15	14	78	1335	5	115	24	152	53	62	49
K14061	universal stress protein F	20	16	23	4	1	3	0	22	0	0	0	2	0	0	2
K14062	outer membrane protein N	17	1	1	5	2	0	0	1	0	0	0	0	0	0	0
K14063	AraC family transcriptional regulator, positive regulator of tynA and feaB	10	1	1	3	1	0	0	0	0	0	0	0	0	0	0
K14064	universal stress protein C	11	1	22	3	1	3	0	0	0	0	0	2	0	0	1
K14065	universal stress protein D	1	0	21	0	0	3	0	0	0	0	0	2	0	0	1
K14067	malate-CoA ligase subunit beta [EC:6.2.1.9]	0	1	15	8	4	4	0	41	2	0	1	0	1	0	1
K02841	heptosyltransferase I [EC:2.4.-.-]	74	74	63	103	914	16	78	1375	41	116	25	154	54	63	53
K02840	UDP-D-galactose:(glucosyl)LPS alpha-1,6-D-galactosyltransferase [EC:2.4.1.-]	616	244	1144	1311	217	1303	95	78	845	23	58	34	121	19	426
K02843	heptosyltransferase II [EC:2.4.-.-]	327	752	233	188	953	59	88	3464	93	138	74	201	94	91	126
K02844	UDP-glucose:(heptosyl)LPS alpha-1,3-glucosyltransferase [EC:2.4.1.-]	25	5	32	4	909	8	1	27	39	3	1	5	5	8	2
K02847	O-antigen ligase [EC:6.-.-.-]	7	0	22	3	1	3	0	0	1	0	0	2	0	0	1
K02846	N-methyl-L-tryptophan oxidase [EC:1.5.3.-]	11	2	22	3	1	3	0	1	1	0	0	3	0	1	1
K02102	arabinose operon protein AraM	7	12	32	6	2	83	0	10	26	7	7	11	2	11	2
K09758	aspartate 4-decarboxylase [EC:4.1.1.12]	240	290	493	364	191	227	265	959	178	157	131	855	95	387	91
K06039	uncharacterized protein involved in oxidation of intracellular sulfur	14	3	22	3	5	4	0	2	161	1	0	2	0	0	1
K06034	sulfopyruvate decarboxylase subunit alpha [EC:4.1.1.79]	0	0	3	2	1	2	0	4	1	0	0	1	1	0	1
K01581	ornithine decarboxylase [EC:4.1.1.17]	1718	1008	1836	1283	5375	2097	3064	4710	4907	362	203	587	454	212	632
K02702	photosystem I 4.8kDa protein	958	11	717	2	0	90	0	10	84	2	0	1	1	2	0
K02659	twitching motility protein PilI	2131	25	1460	16	5053	198	2813	111	3700	4	2	2	4	5	69
K13490	two-component system, chemotaxis family, sensor histidine kinase and response regulator WspE	10	2	10	3	509	5	1	30	32	2	1	2	5	8	1
K13491	two-component system, chemotaxis family, response regulator WspF [EC:3.1.1.61]	11	2	11	4	803	5	1	30	34	2	1	2	5	8	1
K03644	lipoic acid synthetase [EC:2.8.1.8]	2434	308	1932	434	5385	732	2935	1458	4169	916	330	1507	873	695	3641
K03645	negative modulator of initiation of replication	19	16	25	3	1	3	0	25	161	0	1	2	0	0	2
K03646	colicin import membrane protein	257	445	1710	182	1067	2257	106	1798	1925	117	67	153	54	141	83
K03647	protein involved in ribonucleotide reduction	5114	4673	5157	9488	4450	5345	4803	2226	3399	4459	6954	756	8449	4848	1671
K03640	peptidoglycan-associated lipoprotein	855	1705	508	236	5172	224	2907	3934	3850	284	226	393	631	342	439
K03641	TolB protein	359	181	320	234	5166	130	2906	2545	3787	194	159	232	212	219	382
K03642	rare lipoprotein A	1989	1721	1357	336	10281	409	5730	4827	7706	262	222	371	327	346	3277
K03643	LPS-assembly lipoprotein	280	87	207	196	5152	111	2899	2179	3771	114	30	153	54	62	126
K03648	uracil-DNA glycosylase [EC:3.2.2.-];uracil-DNA glycosylase [EC:3.2.2.27]	7746	7853	8514	11081	10437	9414	8203	7641	9066	6599	9948	5109	10857	7630	8301
K03649	TDG/mug DNA glycosylase family protein [EC:3.2.2.-]	36	83	122	192	359	51	208	180	46	28	52	45	38	49	581
K06694	26S proteasome non-ATPase regulatory subunit 10	0	0	0	0	42	0	0	0	0	0	0	0	0	0	0
K12428	fatty acid CoA ligase FadD32	7	2	12	7	2	14	7	10	6	0	1	0	0	1	1
K12429	fatty acid CoA ligase FadD36	0	0	3	1	0	3	0	4	1	0	0	0	0	0	0
K12422	long chain fatty acid CoA ligase FadD10 [EC:6.2.1.-]	0	0	0	0	0	0	0	1	0	0	0	0	0	0	0
K12423	fatty acid CoA ligase FadD21	0	0	0	0	0	0	0	2	0	0	0	0	0	0	0
K12420	ketoreductase [EC:1.1.1.-];ketoacyl reductase [EC:1.3.1.-]	0	0	0	0	0	1	0	0	0	0	0	0	0	0	0
K12421	fatty acid CoA ligase FadD9	0	0	2	1	0	2	0	3	0	0	0	0	0	1	0
K12426	long chain fatty acid CoA FadD26	0	0	0	0	0	0	0	2	0	0	0	0	0	0	0
K12427	fatty acid CoA ligase FadD28	0	0	0	0	0	0	0	2	0	0	0	0	0	0	0
K12424	fatty acid CoA ligase FadD22	0	0	0	0	0	0	0	1	0	0	0	0	0	0	0
K07349	minor fimbrial subunit	33	3	22	6	1	3	0	0	0	0	0	2	0	0	1
K07348	minor fimbrial subunit	17	1	22	2	2	3	0	1	1	0	0	2	0	0	1
K05380	phycoerythrin-associated linker protein	2	0	0	0	0	0	0	0	0	0	0	0	0	0	0
K07345	major type 1 subunit fimbrin (pilin)	185	23	62	24	4499	15	1317	67	3325	1	1	6	1	1	70
K07344	type IV secretion system protein TrbL	13	75	163	87	98	85	7	1152	77	2	7	3	4	10	7
K07347	outer membrane usher protein	333	43	95	31	5967	30	2815	126	3755	1	2	8	2	2	97
K07346	fimbrial chaperone protein	256	30	163	79	5026	81	2819	693	3746	2	4	6	4	7	99
K07341	death on curing protein	5622	5100	3924	7929	3766	3503	3735	2884	2155	2815	4944	321	6589	2881	1776
K07340	hypothetical protein	228	18	174	88	4533	93	2820	794	3597	2	5	5	4	8	75
K07343	DNA transformation protein and related proteins	130	182	506	370	1104	615	80	1030	325	196	273	642	369	291	257
K07342	protein transport protein SEC61 subunit gamma and related proteins	0	0	0	0	0	1	0	0	0	0	0	0	2	0	0
K06968	ribosomal RNA large subunit methyltransferase M [EC:2.1.1.-]	31	19	32	3	904	10	1	35	199	5	2	7	7	9	3
K06969	putative SAM-dependent methyltransferase;ribosomal RNA large subunit methyltransferase I [EC:2.1.1.-]	5152	6010	11562	4197	4825	11229	2167	13069	5460	6877	7144	14103	6907	10056	5766
K06962	None	1395	1324	5195	438	654	5679	223	1866	2497	212	294	1151	256	1059	815
K06960	None	7537	7774	12025	9229	5389	11996	4477	8021	6470	4881	8454	7467	8947	7697	5333
K06961	ribosomal RNA assembly protein	0	0	0	0	0	1	0	0	0	0	0	0	2	0	0
K06966	None	7489	7382	10371	9081	11248	9511	7591	6382	9152	5538	7517	2358	9578	6208	5537
K06967	;tRNA (adenine-N(1)-)-methyltransferase [EC:2.1.1.36]	3186	2573	5763	4541	2366	5790	1858	5648	2989	3855	5552	7820	4284	6187	4704
K06965	protein pelota	0	0	0	0	0	1	0	0	0	0	0	0	2	0	0
K08995	putative membrane protein	26	25	179	116	1472	123	6	1023	151	4	8	5	8	17	7
K08994	putative membrane protein	1217	55	915	111	5506	198	2821	997	3715	86	98	78	434	142	320
K08997	hypothetical protein	220	3	29	5	4251	11	2814	22	3654	1	1	3	1	1	70
K08996	putative membrane protein	39	3	84	407	6	58	14	15	37	4	1	4	15	2	2
K08990	putative membrane protein	17	14	158	84	90	80	7	737	232	1	5	4	2	7	7
K08993	putative membrane protein	19	2	26	3	759	5	0	11	195	1	0	3	0	1	1
K08992	putative membrane protein	226	18	29	5	4150	10	2814	39	3652	1	1	2	1	0	70
K08999	hypothetical protein	1417	1966	4845	104	452	5238	39	2259	2271	108	221	169	468	673	2947
K08998	hypothetical protein	8637	8845	12334	9102	9542	12557	7317	9188	10361	5695	8576	8669	9821	8220	8376
K08344	suppressor for copper-sensitivity B	11	1	3	3	3	2	0	15	2	0	0	0	0	0	0
K08345	nitrate reductase 2, alpha subunit [EC:1.7.99.4]	11	1	21	1	1	3	0	0	0	0	0	2	0	0	1
K08346	nitrate reductase 2, beta subunit [EC:1.7.99.4]	10	1	21	1	1	3	0	0	0	0	0	2	0	0	1
K14940	gamma-F420-2:alpha-L-glutamate ligase [EC:6.3.2.32]	1	5	9	1	2	4	0	13	162	0	0	0	0	0	1
K02724	photosystem II PsbZ protein	959	11	717	2	0	90	0	10	84	2	0	1	1	2	0
K08349	formate dehydrogenase-N, beta subunit [EC:1.2.1.2]	11	1	22	3	1	3	0	0	0	0	0	2	0	0	1
K05928	tocopherol O-methyltransferase [EC:2.1.1.95]	965	11	719	3	4	92	0	12	84	4	2	3	6	10	0
K05927	quinone-reactive Ni/Fe-hydrogenase small subunit [EC:1.12.5.1]	0	1	2	0	0	0	0	8	160	0	1	1	0	3	0
K05922	quinone-reactive Ni/Fe-hydrogenase large subunit [EC:1.12.5.1]	0	0	1	0	0	0	0	7	160	0	1	1	0	2	0
K05921	5-oxopent-3-ene-1,2,5-tricarboxylate decarboxylase / 2-hydroxyhepta-2,4-diene-1,7-dioate isomerase [EC:4.1.1.68 5.3.3.-]	60	26	47	20	1726	23	1	145	117	2	1	3	1	4	5
K00349	Na+-transporting NADH:ubiquinone oxidoreductase subunit D [EC:1.6.5.-]	851	1665	212	6	4258	104	2834	1568	3879	930	252	1325	881	596	3006
K00340	NADH-quinone oxidoreductase subunit K [EC:1.6.5.3];NADH dehydrogenase I subunit K [EC:1.6.5.3]	940	1778	535	174	5194	243	2855	3292	3695	1067	460	1470	873	874	717
K00341	NADH dehydrogenase I subunit L [EC:1.6.5.3];NADH-quinone oxidoreductase subunit L [EC:1.6.5.3]	941	1779	537	176	5196	245	2855	3295	3696	1067	460	1470	873	874	718
K00690	sucrose phosphorylase [EC:2.4.1.7]	6345	5806	8185	8273	4397	9072	3965	2784	4729	2953	5135	484	6823	3467	2011
K00343	NADH dehydrogenase I subunit N [EC:1.6.5.3];NADH-quinone oxidoreductase subunit N [EC:1.6.5.3]	940	1779	538	176	5196	245	2855	3296	3696	1066	460	1470	872	874	718
K00344	NADPH2:quinone reductase [EC:1.6.5.5]	1343	160	1559	616	7634	870	2955	2859	4471	35	118	255	59	197	738
K00697	alpha,alpha-trehalose-phosphate synthase (UDP-forming) [EC:2.4.1.15]	236	25	214	120	3967	148	2824	909	3585	6	12	7	7	15	54
K00346	Na+-transporting NADH:ubiquinone oxidoreductase subunit A [EC:1.6.5.-]	851	1665	212	6	4258	104	2834	1568	3879	930	252	1325	881	596	3006
K00347	Na+-transporting NADH:ubiquinone oxidoreductase subunit B [EC:1.6.5.-]	851	1665	212	6	4258	104	2834	1568	3879	930	252	1325	881	596	3006
K09116	hypothetical protein	60	120	319	275	212	520	71	221	214	78	157	338	101	197	182
K09117	hypothetical protein	3067	2761	3687	2547	5157	4448	3513	6073	5778	2027	2870	4090	2363	2691	6399
K05337	ferredoxin	2304	2438	6442	1416	925	5275	772	4522	2603	968	1043	4242	895	2838	4426
K09118	hypothetical protein	5354	4501	4490	7157	4015	3959	3743	1016	2894	2730	4934	478	6452	3022	1395
K09119	hypothetical protein	0	0	0	0	0	1	0	0	0	0	0	0	2	0	0
K02106	short-chain fatty acids transporter	227	41	69	25	4764	40	2813	96	3700	17	18	17	18	25	134
K05823	N-acetyldiaminopimelate deacetylase [EC:3.5.1.47]	639	147	589	741	221	1069	167	133	448	46	71	284	135	163	182
K05820	MFS transporter, PPP family, 3-phenylpropionic acid transporter	43	33	94	34	1133	31	8	210	214	10	9	32	6	19	466
K05826	lysine biosynthesis protein LysW	1	2	7	0	2	2	0	25	3	1	0	0	0	2	1
K05827	lysine biosynthesis protein LysX	1	2	7	0	2	3	0	27	4	1	0	0	0	3	1
K02100	MFS transporter, SP family, arabinose:H+ symporter	11	1	22	1	1	3	0	1	0	0	0	2	0	0	1
K00525	ribonucleoside-diphosphate reductase alpha chain [EC:1.17.4.1]	8128	8987	12151	9384	10431	12311	7380	11411	10196	5507	8123	7968	9467	7550	7810
K00526	ribonucleoside-diphosphate reductase beta chain [EC:1.17.4.1]	5941	6634	9287	8176	9493	10555	6770	5420	9270	3202	5335	1484	7026	4013	5127
K00527	ribonucleoside-triphosphate reductase [EC:1.17.4.2]	9698	11137	16881	14286	6985	16182	7118	15721	8841	10702	14267	15101	14607	15160	10398
K00520	mercuric reductase [EC:1.16.1.1]	992	35	830	78	489	156	26	352	144	7	40	10	23	40	652
K00523	CDP-4-dehydro-6-deoxyglucose reductase [EC:1.17.1.1]	11	23	238	149	1054	143	9	1368	157	2	7	3	6	12	9
K02451	general secretion pathway protein B	7	2	7	3	0	2	0	33	162	0	0	0	1	0	0
K00528	ferredoxin--NADP+ reductase [EC:1.18.1.2]	7001	7418	11643	8722	15326	12432	10059	9294	13748	5871	8659	8549	9763	8210	5176
K00529	ferredoxin--NAD+ reductase [EC:1.18.1.3]	19	24	228	128	570	140	14	1057	111	2	10	3	6	12	33
K00025	malate dehydrogenase [EC:1.1.1.37]	6	0	2	0	2	0	0	0	0	2	1	2	4	8	0
K14215	trans,polycis-decaprenyl diphosphate synthase [EC:2.5.1.86]	0	0	0	0	0	0	0	2	0	0	0	0	0	0	0
K03453	bile acid:Na+ symporter, BASS family	2357	3838	1410	633	9756	1728	5858	9890	7809	1652	2177	2384	1855	1583	2529
K00796	dihydropteroate synthase [EC:2.5.1.15]	3257	3557	4555	1421	5950	5211	3173	7932	6703	2100	2608	4524	2418	2590	5677
K05339	holin-like protein LrgB	15	1	24	25	32	36	2	18	17	2	1	5	1	1	6
K00027	malate dehydrogenase (oxaloacetate-decarboxylating) [EC:1.1.1.38]	4423	3984	11602	4602	2364	10841	2130	8271	5346	4476	6195	10916	4656	8344	5314
K00794	6,7-dimethyl-8-ribityllumazine synthase [EC:2.5.1.78];riboflavin synthase beta chain [EC:2.5.1.-]	4903	4105	6306	4468	7340	5082	4691	9858	6396	4571	5304	8345	4803	6126	7131
K00793	riboflavin synthase [EC:2.5.1.9];riboflavin synthase alpha chain [EC:2.5.1.9]	4765	3979	5920	4339	6400	4882	4671	8872	6343	4361	3843	8057	4379	5770	6108
K01347	IgA-specific serine endopeptidase [EC:3.4.21.72]	0	0	1	1	1	0	0	0	0	0	0	0	0	0	0
K00791	tRNA dimethylallyltransferase [EC:2.5.1.75]	10292	11539	15085	11848	11123	15242	8488	13921	11822	7925	11126	9967	12381	10618	9452
K00790	UDP-N-acetylglucosamine 1-carboxyvinyltransferase [EC:2.5.1.7]	11000	10990	17359	13147	11665	17501	8936	15925	12796	9477	12393	15798	13781	13796	11753
K02694	photosystem I subunit III	959	11	717	2	0	90	0	10	84	2	0	1	1	2	0
K02696	photosystem I subunit VIII	959	11	717	2	0	90	0	10	84	2	0	1	1	2	0
K02697	photosystem I subunit IX	959	11	717	2	0	90	0	10	84	2	0	1	1	2	0
K02690	photosystem I core protein Ib;photosystem I P700 chlorophyll a apoprotein A2	959	11	717	2	0	90	0	10	84	2	0	1	1	2	0
K02691	photosystem I subunit VII	959	11	717	2	0	92	0	10	84	2	0	1	1	3	0
K02692	photosystem I subunit II	959	11	717	2	0	90	0	10	84	2	0	1	1	2	0
K02693	photosystem I subunit IV	959	11	717	2	0	90	0	10	84	2	0	1	1	2	0
K02698	photosystem I subunit X	1918	22	1434	5	0	181	0	21	169	3	1	2	2	4	0
K02699	photosystem I subunit XI	959	11	717	2	0	90	0	10	84	2	0	1	1	2	0
K00836	diaminobutyrate-2-oxoglutarate transaminase [EC:2.6.1.76]	34	15	27	14	1792	18	17	85	89	67	66	112	194	28	67
K00837	None	1977	1427	1465	336	4021	431	2895	3336	3800	1122	451	2184	1073	1071	1457
K00835	valine--pyruvate aminotransferase [EC:2.6.1.66]	1193	23	747	8	4153	101	2815	41	3576	71	66	117	199	36	63
K00832	aromatic-amino-acid transaminase [EC:2.6.1.57]	829	1292	1284	1639	6226	1107	3896	4184	4177	1868	2145	821	1974	2046	447
K00833	adenosylmethionine-8-amino-7-oxononanoate aminotransferase [EC:2.6.1.62]	788	995	631	253	4917	354	2873	3091	3917	1034	404	1427	1001	748	3757
K00830	alanine-glyoxylate transaminase / serine-glyoxylate transaminase / serine-pyruvate transaminase [EC:2.6.1.44 2.6.1.45 2.6.1.51]	1247	253	991	120	4335	212	2844	1327	4159	101	154	123	187	186	332
K00831	phosphoserine aminotransferase [EC:2.6.1.52]	7169	9146	11801	10145	10496	12228	8057	11078	10102	7445	10622	8390	11562	9877	8580
K00839	aminotransferase [EC:2.6.1.-]	146	164	294	328	238	416	83	408	219	98	106	384	54	206	558
K04335	minor curlin subunit	4	1	14	8	9	6	0	47	166	1	0	0	0	0	1
K04334	major curlin subunit	5	0	21	1	1	3	0	0	0	0	0	2	0	0	1
K01120	3',5'-cyclic-nucleotide phosphodiesterase [EC:3.1.4.17]	7	4	20	13	6	12	0	94	4	2	1	3	4	8	1
K01126	glycerophosphoryl diester phosphodiesterase [EC:3.1.4.46]	4917	3466	9078	2724	11036	8894	4960	7032	11095	3161	3862	8208	3386	5441	8546
K04333	LuxR family transcriptional regulator, csgAB operon transcriptional regulatory protein	11	1	22	3	1	3	0	0	0	0	0	2	0	0	1
K01129	dGTPase [EC:3.1.5.1]	3106	5676	13225	1883	7266	14984	3530	9909	11105	2281	3771	7227	2998	5538	6406
K01128	None	1	9	100	64	71	60	5	605	57	1	3	1	3	7	5
K04338	curli production assembly/transport component CsgF	5	1	25	4	3	5	0	4	162	0	0	3	0	0	2
K02470	DNA gyrase subunit B [EC:5.99.1.3]	15536	15683	21427	19919	15649	21342	12704	16940	15639	12258	18971	15646	20443	16911	13778
K02471	putative ATP-binding cassette transporter	1089	233	939	279	908	200	162	3923	214	234	56	308	111	128	109
K02472	UDP-N-acetyl-D-mannosaminuronic acid dehydrogenase [EC:1.1.1.-]	99	169	157	192	97	82	209	164	68	61	95	132	104	104	2851
K02474	UDP-N-acetyl-D-galactosamine dehydrogenase [EC:1.1.1.-]	438	364	292	30	3890	268	2821	976	3597	943	311	1315	898	584	336
K02475	two-component system, CitB family, response regulator	45	30	89	36	114	52	20	127	199	9	13	30	7	17	457
K02476	two-component system, CitB family, sensor kinase [EC:2.7.13.3]	44	29	89	36	114	52	20	127	201	9	13	30	7	17	457
K02477	two-component system, LytT family, response regulator	1269	3460	4785	500	695	5878	121	4700	2803	1440	950	2137	2253	1947	1712
K02478	two-component system, LytT family, sensor kinase [EC:2.7.13.3]	69	71	193	277	215	360	72	136	491	24	67	285	24	160	31
K02479	two-component system, NarL family, response regulator	985	40	737	9	596	98	3	151	119	80	96	73	148	141	656
K09019	putative NADH dehydrogenase/NAD(P)H nitroreductase RutE [EC:1.-.-.-]	19	7	69	20	17	45	11	81	34	2	3	4	3	3	6
K01267	aspartyl aminopeptidase [EC:3.4.11.21]	1209	2397	6174	2061	2211	7854	1113	4481	3166	2519	4471	2019	3031	3902	2428
K13075	N-acyl homoserine lactone hydrolase [EC:3.1.1.81]	0	0	4	2	2	0	0	9	0	0	0	0	0	0	3
K11441	dehydrogluconokinase [EC:2.7.1.13]	5	1	3	0	586	2	0	1	34	0	0	0	0	0	0
K14055	universal stress protein E	19	16	23	3	103	3	0	24	163	0	1	2	0	0	2
K13292	phosphatidylglycerol:prolipoprotein diacylglycerol transferase [EC:2.-.-.-]	4974	3928	10964	5058	11169	11265	7845	9701	12369	4219	6018	8409	4853	7126	5398
K14057	LysR family transcriptional regulator, regulator of abg operon	10	1	5	3	2	0	0	9	0	0	0	0	0	0	0
K14056	HTH-type transcriptional regulator, repressor for puuD	7	1	1	2	0	0	0	1	0	0	0	0	0	0	0
K02856	L-rhamnose-H+ transport protein	59	83	52	12	6	34	1	136	19	71	53	128	379	62	43
K02585	nitrogen fixation protein NifB	54	96	96	15	31	93	3	452	66	495	324	1239	595	682	546
K12211	intracellular multiplication protein IcmG	0	0	1	0	0	0	0	0	0	0	0	0	0	0	0
K12213	intracellular multiplication protein IcmK	0	0	1	0	0	0	0	0	0	0	0	0	0	0	0
K12212	intracellular multiplication protein IcmJ	0	0	1	0	0	0	0	0	0	0	0	0	0	0	0
K02854	AraC family transcriptional regulator, L-rhamnose operon transcriptional activator RhaR	12	5	24	3	1	3	0	23	1	0	0	2	0	0	1
K12217	intracellular multiplication protein IcmO	0	0	4	2	0	1	0	17	0	0	0	0	1	0	0
K12216	intracellular multiplication protein IcmN	0	0	1	0	0	0	0	0	0	0	0	0	0	0	0
K12219	intracellular multiplication protein IcmQ	0	0	1	0	0	0	0	0	0	0	0	0	0	0	0
K12218	intracellular multiplication protein IcmP	0	0	4	2	0	1	0	17	0	0	0	0	1	0	0
K02855	AraC family transcriptional regulator, L-rhamnose operon regulatory protein RhaS	26	7	35	5	2	6	1	7	2	4	3	21	2	8	3
K08692	malate-CoA ligase subunit alpha [EC:6.2.1.9]	0	1	15	8	4	4	0	41	2	0	1	0	1	0	1
K08693	3'-nucleotidase [EC:3.1.3.6]	11	6	21	9	2	4	5	20	5	1	2	8	2	2	2
K08690	cis-2,3-dihydrobiphenyl-2,3-diol dehydrogenase [EC:1.3.1.56]	0	0	0	0	0	1	0	6	0	0	0	0	0	0	0
K08691	malyl-CoA lyase [EC:4.1.3.24]	2	2	17	10	10	10	1	65	6	0	1	1	1	1	2
K08696	carbon dioxide concentrating mechanism protein CcmK	2876	33	2151	8	0	272	0	32	254	4	2	3	3	6	0
K08697	carbon dioxide concentrating mechanism protein CcmL	959	11	717	2	0	90	0	10	84	2	0	1	1	2	0
K11748	glutathione-regulated potassium-efflux system ancillary protein KefG	36	25	35	8	5	5	1	125	1	76	93	74	144	138	2999
K11749	regulator of sigma E protease [EC:3.4.24.-]	4210	5348	9795	4766	7170	10515	4789	10752	8627	4917	5968	9234	5499	7469	7753
K11746	glutathione-regulated potassium-efflux system ancillary protein KefF	11	2	24	4	1	4	0	11	2	0	0	2	0	0	1
K11747	glutathione-regulated potassium-efflux system protein KefB	235	33	174	89	5037	92	2819	807	3596	2	6	5	5	8	77
K11744	AI-2 transport protein TqsA	17	1	23	3	4	4	0	0	1	2	1	4	4	8	2
K11745	glutathione-regulated potassium-efflux system ancillary protein KefC	18	3	26	5	4	7	0	30	2	2	1	4	4	8	2
K11742	spermidine export protein MdtI	24	58	42	3	2	4	0	174	3	2	3	3	1	4	1
K11743	spermidine export protein MdtJ	177	1033	3814	47	410	4680	13	1233	2043	70	178	88	87	568	150
K11740	bacteriophage N4 adsorption protein B	1	0	8	7	218	5	0	30	4	0	1	0	0	1	0
K11741	quaternary ammonium compound-resistance protein SugE	194	279	333	343	1281	157	181	3906	342	251	77	367	125	161	1612
K13920	propanediol dehydratase small subunit [EC:4.2.1.28]	10	8	34	10	2	9	0	14	4	13	8	21	17	2	7
K13921	1-propanol dehydrogenase	7	1	24	5	0	4	0	0	1	2	0	4	2	0	1
K13922	propionaldehyde dehydrogenase	91	151	376	288	215	620	71	300	253	111	174	369	138	234	194
K13923	phosphotransacylase	7	1	23	5	0	4	0	0	1	0	0	2	0	0	1
K13924	two-component system, chemotaxis family, CheB/CheR fusion protein [EC:2.1.1.80 3.1.1.61]	972	29	817	83	148	145	8	362	124	4	37	9	18	24	53
K13926	ribosome-dependent ATPase	22	14	149	74	984	77	7	703	104	4	5	6	8	15	8
K13927	holo-ACP synthase / triphosphoribosyl-dephospho-CoA synthase [EC:2.7.7.61 2.7.8.25]	86	166	143	107	14	62	81	1662	58	228	164	251	186	189	200
K13928	LysR family transcriptional regulator, malonate utilization transcriptional regulator	16	3	10	6	800	5	0	34	35	0	0	0	1	1	24
K13929	malonate decarboxylase alpha subunit [EC:2.3.1.187]	588	79	403	71	813	683	5	106	285	0	1	2	4	4	31
K09923	hypothetical protein	19	2	26	3	689	5	0	3	339	0	0	3	0	1	1
K09922	hypothetical protein	240	311	217	184	96	112	104	2534	255	1054	338	1428	707	704	413
K06201	copper homeostasis protein	1283	3154	5961	2210	1298	6743	1194	4794	2902	3210	4275	3254	3710	3995	4634
K06200	carbon starvation protein	6251	7680	8897	9751	9802	7833	7957	10074	7454	5730	9358	4996	9483	7704	4120
K06207	GTP-binding protein	9768	9935	14764	11840	11102	14976	8485	12375	11706	7573	10754	9332	11748	10333	9053
K06206	sugar fermentation stimulation protein A	2474	1589	3368	1032	1395	2225	402	4331	1247	1050	1123	4646	890	2630	1323
K06205	MioC protein	24	17	27	3	901	6	0	27	196	0	1	3	0	1	2
K09924	hypothetical protein	19	26	154	89	997	88	7	818	111	7	7	18	11	19	10
K09929	hypothetical protein	2	1	2	0	296	0	0	4	163	0	0	0	0	0	23
K06208	chorismate mutase [EC:5.4.99.5]	1011	158	801	8	27	179	4	713	150	473	275	1267	617	572	795
K00759	adenine phosphoribosyltransferase [EC:2.4.2.7]	9344	9182	15257	13089	11476	15473	9384	10188	11873	8336	12596	8544	13224	11643	9105
K00758	thymidine phosphorylase [EC:2.4.2.4]	228	502	168	70	32	55	12	1008	203	4	7	5	3	7	8
K00752	hyaluronan synthase [EC:2.4.1.212]	33	84	61	16	8	22	4	473	20	9	13	22	6	21	19
K00757	uridine phosphorylase [EC:2.4.2.3]	2022	3804	7362	2649	1331	7083	1482	5887	3571	4623	5631	8632	4952	6973	6398
K00756	pyrimidine-nucleoside phosphorylase [EC:2.4.2.2]	1685	2399	6656	1679	1325	7497	775	4833	3224	1522	1563	6264	1375	4047	2217
K00754	None	6595	4209	13585	6635	2926	13149	1890	8620	6860	4395	5940	7939	5185	6776	5607
K06001	tryptophan synthase beta chain [EC:4.2.1.20]	799	1163	518	81	4207	376	2846	1551	3689	1339	741	2010	1202	1007	1024
K09766	hypothetical protein	265	340	491	371	238	535	87	1104	301	634	411	1715	750	788	1414
K05554	aromatase [EC:4.2.1.-];cyclase/dehydratase [EC:4.2.1.-]	0	0	0	0	0	1	0	0	0	0	0	0	0	0	0
K07150	None	2784	3303	8201	2857	1313	9085	782	5630	4251	1183	1340	4835	1218	3106	2325
K07151	dolichyl-diphosphooligosaccharide--protein glycosyltransferase [EC:2.4.1.119]	16	60	22	1	2	2	2	175	4	10	9	34	18	9	19
K07152	None	102	81	468	256	1977	236	25	2109	419	89	139	88	457	173	1730
K07153	high frequency lysogenization protein	25	17	29	4	901	7	0	44	198	0	1	3	1	1	25
K07154	None	1219	3322	6654	1717	2704	7798	1162	5448	4317	3178	2958	2586	3406	3746	1584
K07156	None	54	35	100	48	836	71	20	282	81	78	97	74	142	137	712
K07157	None	14	19	183	111	1009	111	7	951	284	2	6	4	6	10	8
K07406	alpha-galactosidase [EC:3.2.1.22]	173	334	771	209	144	669	83	745	269	437	690	1022	693	788	861
K07407	alpha-galactosidase [EC:3.2.1.22]	11940	12382	10571	15932	8303	9457	8079	9050	5655	9719	13923	10366	16971	11203	9884
K07404	6-phosphogluconolactonase [EC:3.1.1.31]	1851	919	2804	2247	721	3942	270	1570	1748	553	861	1041	734	1079	1596
K07405	alpha-amylase [EC:3.2.1.1]	642	1759	241	1	6	98	20	1863	71	924	255	1324	593	601	154
K07402	xanthine dehydrogenase accessory factor	3132	4534	13168	4897	3967	12274	2721	9980	5683	5655	7772	9830	5859	9542	3987
K07403	membrane-bound serine protease (ClpP class)	292	621	244	305	820	373	70	1190	186	123	186	349	211	312	753
K07400	Fe/S biogenesis protein NfuA	233	19	34	6	5050	13	2814	54	3688	1	1	3	1	1	71
K07401	selenoprotein W-related protein	17	17	147	89	990	87	6	790	107	2	5	2	3	8	6
K01808	ribose 5-phosphate isomerase B [EC:5.3.1.6]	3222	6175	12764	3669	2863	13833	1782	10984	6163	5290	7961	10128	5977	8589	9079
K01809	mannose-6-phosphate isomerase [EC:5.3.1.8]	9869	9965	17700	12447	7762	16722	6488	10642	8367	9079	12701	9319	13496	12300	8599
K01800	maleylacetoacetate isomerase [EC:5.2.1.2]	218	10	81	38	5079	44	2816	287	3709	2	3	2	3	3	49
K01802	peptidylprolyl isomerase [EC:5.2.1.8]	12952	12064	11398	15800	10855	8783	8494	9478	6881	8427	12343	2843	16192	8677	6246
K01803	triosephosphate isomerase (TIM) [EC:5.3.1.1]	9760	9962	15041	12321	11411	15228	8508	13127	11817	7718	10992	9612	12023	10422	9398
K01804	L-arabinose isomerase [EC:5.3.1.4]	5045	6127	6441	7381	4083	7563	3722	3092	3589	3108	5385	827	6815	3715	1950
K01805	xylose isomerase [EC:5.3.1.5]	4458	4426	2652	7457	3768	1972	3726	2543	1344	3168	5070	1446	6955	3426	1657
K01807	ribose 5-phosphate isomerase A [EC:5.3.1.6]	7688	5328	7939	10692	9832	8022	7773	4911	8546	4807	7282	1246	9038	5151	2584
K14668	minimal PKS chain-length factor (CLF/KS beta) [EC:2.3.1.-]	0	0	1	0	0	1	0	2	0	0	0	0	0	0	0
K14666	N-acetylglucosaminyltransferase [EC:2.4.1.-]	0	1	5	4	3	3	0	26	1	0	0	0	0	0	0
K14667	minimal PKS ketosynthase (KS/KS alpha) [EC:2.3.1.-]	0	0	1	0	0	1	0	2	0	0	0	0	0	0	0
K01664	para-aminobenzoate synthetase component II [EC:2.6.1.85]	4627	4512	3845	7189	7879	3895	6553	1082	6463	2723	4917	460	6429	3018	1771
K01665	para-aminobenzoate synthetase component I [EC:2.6.1.85]	930	1661	667	467	5374	537	2933	2947	3988	972	390	1641	935	788	3592
K01666	4-hydroxy 2-oxovalerate aldolase [EC:4.1.3.39]	135	189	374	92	357	251	8	766	123	478	569	742	701	451	944
K01667	tryptophanase [EC:4.1.99.1]	184	258	182	174	115	104	216	512	81	1252	415	2339	891	1052	388
K01661	naphthoate synthase [EC:4.1.3.36]	1570	1634	1045	529	30	304	114	2752	387	229	112	344	549	213	3433
K01662	1-deoxy-D-xylulose-5-phosphate synthase [EC:2.2.1.7]	9559	9548	14961	13174	11322	14749	9402	11652	11581	9740	13286	10573	14313	12616	9896
K01668	tyrosine phenol-lyase [EC:4.1.99.2]	0	0	1	0	0	0	0	3	0	2	1	1	1	2	1
K01669	deoxyribodipyrimidine photo-lyase [EC:4.1.99.3]	2227	122	1848	425	5479	687	2914	1202	4145	51	112	289	359	187	2980
K02863	large subunit ribosomal protein L1	9769	9977	14860	11839	11119	15134	8484	12452	11747	7772	10987	9686	12062	10458	9384
K02862	putative membrane protein	0	4	10	10	4	9	1	71	4	0	0	0	0	0	506
K02860	16S rRNA processing protein RimM	9751	9969	14851	11830	11113	15132	8479	12426	11744	7744	10971	9623	12026	10438	9357
K02867	large subunit ribosomal protein L11	9769	9977	14860	11839	11119	15134	8484	12454	11748	7773	10987	9686	12063	10458	9384
K02866	large subunit ribosomal protein L10e	0	0	0	0	0	1	0	0	0	0	0	0	2	0	0
K02864	large subunit ribosomal protein L10	9630	9866	14675	11748	11101	15073	8478	12209	11701	7577	10857	9414	11763	10379	9222
K02869	large subunit ribosomal protein L12	0	0	0	0	0	1	0	0	0	0	0	0	2	0	0
K05362	UDP-N-acetylmuramoyl-L-alanyl-D-glutamate-L-lysine ligase [EC:6.3.2.7]	4	1	7	15	2	3	22	6	2	21	4	0	97	1	503
K05365	penicillin-binding protein 1B [EC:2.4.1.129 3.4.-.-]	465	39	72	13	10062	28	5629	123	7377	3	2	6	3	2	141
K03402	transcriptional regulator of arginine metabolism	7061	9082	11448	9260	5175	12054	4417	8831	6615	4812	8259	7275	8895	7605	5172
K03403	magnesium chelatase subunit H [EC:6.6.1.1]	1917	23	1442	9	6	185	0	50	174	3	1	2	2	4	1
K03406	methyl-accepting chemotaxis protein	12840	13052	27411	11947	28157	16502	4154	40942	14835	14861	16172	53764	14452	29186	27264
K03407	two-component system, chemotaxis family, sensor kinase CheA [EC:2.7.13.3]	1160	1162	2720	1227	1475	1497	492	3757	1334	2216	2011	7159	2555	3848	3621
K03404	magnesium chelatase subunit D [EC:6.6.1.1]	975	88	761	12	23	120	0	484	110	4	4	2	3	7	5
K03405	magnesium chelatase subunit I [EC:6.6.1.1]	988	93	782	27	829	139	8	583	155	4	6	2	3	9	6
K03408	purine-binding chemotaxis protein CheW	2597	1899	4555	1496	2515	2340	581	5891	2000	3037	2645	9509	3628	5027	4183
K03409	chemotaxis protein CheX	378	297	394	329	4102	496	2885	1121	3907	597	477	1770	884	805	947
K02315	DNA replication protein DnaC	3260	2632	6176	3169	1392	4786	1035	8478	2645	3357	4427	11240	3276	6240	4962
K02314	replicative DNA helicase [EC:3.6.4.12];replicative DNA helicase [EC:3.6.1.-]	9967	10144	15266	11953	11769	15341	8514	13441	11944	7844	11088	9882	12183	10595	9532
K02317	DNA replication protein DnaT	11	1	22	3	1	3	0	0	1	0	0	2	0	0	1
K02316	DNA primase [EC:2.7.7.-]	9776	9997	14889	11837	11090	15121	8487	12517	11745	7769	10984	9694	12063	10467	9397
K02313	chromosomal replication initiator protein	9832	10159	15001	12025	11211	15165	8683	13007	11781	7859	11112	9797	12207	10632	9624
K02312	2,3-dihydroxybenzoate-AMP ligase [EC:2.7.7.58]	11	22	63	20	6	21	4	52	12	7	11	27	7	8	30
K02319	DNA polymerase I [EC:2.7.7.7]	5	4	3	1	4	3	2	2	2	10	6	32	18	4	19
K12152	phosphatase NudJ [EC:3.6.1.-]	13	1	22	3	1	3	0	1	161	0	0	2	0	0	1
K12151	multiple stress resistance protein BhsA	11	1	22	3	1	3	0	0	1	0	0	2	0	0	1
K07091	lipopolysaccharide export system permease protein	280	87	202	188	5147	104	2899	2156	3767	115	30	155	54	63	126
K07090	None	7912	6010	11664	4559	24051	8730	12418	19598	20697	4877	5302	14499	5368	7953	12064
K07093	None	1199	38	928	121	5162	230	2833	931	3873	8	13	8	13	25	82
K07095	None	5164	9350	16545	7799	4176	17504	4131	16159	7522	9707	12998	14909	10810	14714	10270
K07094	putative glycerol-1-phosphate prenyltransferase [EC:2.5.1.-]	16	26	22	16	6	13	2	194	4	75	92	70	141	130	712
K07097	None	0	1	2	0	1	0	0	7	0	0	1	1	0	2	0
K07096	None	18	67	25	4	4	5	1	224	6	70	67	114	197	31	16
K07099	None	1183	1381	2116	1015	396	1140	385	3372	739	1369	1159	5833	1152	2839	1458
K07098	None	5626	7076	7320	3932	6313	8051	4624	12710	6600	5574	8045	11284	6147	8689	12426
K11175	phosphoribosylglycinamide formyltransferase 1 [EC:2.1.2.2]	3657	3581	9293	3739	6927	9260	4539	9467	7797	4983	6013	9370	5342	7514	7742
K11177	xanthine dehydrogenase YagR molybdenum-binding subunit [EC:1.17.1.4]	211	14	95	71	4555	77	2807	418	3522	2	8	2	1	7	23
K11176	IMP cyclohydrolase [EC:3.5.4.10]	133	940	3605	36	394	4481	13	984	1971	8	95	4	6	507	28
K11173	hydroxyacid-oxoacid transhydrogenase [EC:1.1.99.24]	0	0	0	0	0	1	0	0	1	0	0	0	0	1	0
K11179	tRNA 2-thiouridine synthesizing protein E [EC:2.8.1.-]	244	80	67	18	5062	21	2815	270	3699	4	6	5	5	5	86
K11178	xanthine dehydrogenase YagS FAD-binding subunit [EC:1.17.1.4]	211	13	94	69	4553	72	2807	408	3521	2	8	2	1	7	23
K00322	NAD(P) transhydrogenase [EC:1.6.1.1]	227	7	55	16	5062	25	2815	104	3533	3	2	3	1	2	71
K00320	coenzyme F420-dependent N5,N10-methenyltetrahydromethanopterin reductase [EC:1.5.99.11]	2	3	11	4	6	14	0	17	5	0	0	0	2	1	2
K00324	NAD(P) transhydrogenase subunit alpha [EC:1.6.1.2]	10104	9027	8347	13994	17875	7299	12965	4020	12719	5398	9710	336	13140	5739	2748
K00325	NAD(P) transhydrogenase subunit beta [EC:1.6.1.2]	5523	4492	4509	6985	8958	3684	6480	1926	6470	2691	4836	148	6410	2856	1334
K00329	NADH dehydrogenase [EC:1.6.5.3]	12	68	132	69	80	66	5	814	63	4	5	2	4	9	5
K05945	None	4	10	1	0	0	1	0	7	0	6	2	17	5	5	2
K05947	mannosyl-3-phosphoglycerate synthase [EC:2.4.1.217]	0	0	2	0	0	0	0	1	0	0	0	0	0	0	0
K05946	N-acetylglucosaminyldiphosphoundecaprenol [EC:2.4.1.187]	4433	1933	5268	2114	632	3335	530	4198	2185	1519	1207	5905	1292	2915	2263
K06944	None	0	0	0	0	0	1	0	0	0	0	0	0	2	0	0
K06945	None	960	14	730	6	3	104	0	51	89	2	1	1	1	3	1
K06946	None	988	36	750	10	3	95	1	134	86	76	92	73	140	133	207
K06415	stage V sporulation protein R	74	97	164	37	27	119	13	457	84	423	241	1212	457	571	798
K06940	None	1671	731	1912	365	3426	1867	126	1824	1136	947	2495	1775	1967	1472	4952
K06941	ribosomal RNA large subunit methyltransferase N [EC:2.1.1.-]	8648	9815	13434	10589	11003	13194	8410	13864	10691	7997	11133	10080	12128	10636	9244
K06942	None	9792	9996	14910	11851	11122	15156	8488	12516	11762	7777	10995	9707	12065	10470	9407
K06943	nucleolar GTP-binding protein	0	0	0	0	0	1	0	0	0	0	0	0	2	0	0
K10806	acyl-CoA thioesterase YciA [EC:3.1.2.-]	37	54	208	107	1009	110	7	1094	124	7	10	10	8	14	34
K10804	acyl-CoA thioesterase I [EC:3.1.2.- 3.1.1.5]	71	38	90	29	2074	30	14	328	416	80	95	77	152	148	284
K10805	acyl-CoA thioesterase II [EC:3.1.2.-]	4706	4575	4118	7099	9074	4049	6503	2364	6650	2687	4835	144	6406	2859	4127
K06948	None	1348	582	2544	3195	830	3017	1376	899	1510	1805	2205	687	2147	2052	1353
K06949	ribosome biogenesis GTPase [EC:3.6.1.-]	5297	5475	11020	4979	7235	11356	5011	10311	8899	5049	6119	9437	5632	7606	8443
K06418	small acid-soluble spore protein A (major alpha-type SASP)	37	123	71	361	224	19	200	298	19	10	39	23	8	70	16
K09138	hypothetical protein	11	25	18	3	3	18	2	23	11	35	37	45	93	34	90
K09134	hypothetical protein	1000	80	914	41	25	282	27	235	145	145	131	190	344	77	2866
K09136	hypothetical protein;ribosomal protein S12 methylthiotransferase	618	158	472	83	925	701	7	355	460	5	7	20	5	15	472
K09137	hypothetical protein	10	27	10	3	4	6	0	224	7	23	28	24	41	20	77
K09131	hypothetical protein	1013	61	865	89	807	153	13	508	323	91	138	115	181	169	291
K09132	hypothetical protein	12	30	137	8	19	173	0	77	51	44	57	56	47	36	56
K09133	hypothetical protein	44	52	9	92	4	1	78	1260	1	115	23	150	50	52	48
K05808	putative sigma-54 modulation protein	3924	4906	8619	1870	6540	8885	3619	8458	7568	3121	3907	8607	3357	5561	6809
K05809	ribosome-associated inhibitor A	18	16	22	3	1	3	0	24	161	0	1	2	0	0	2
K05804	right origin-binding protein	43	46	179	13	17	177	0	97	52	41	54	62	47	34	57
K05805	CreA protein	67	66	178	180	993	89	84	2043	269	113	28	152	52	60	55
K05807	putative lipoprotein	987	1830	535	243	5176	236	2926	4146	3857	1123	410	1558	1093	813	3342
K05800	Lrp/AsnC family transcriptional regulator	24	29	304	174	984	177	15	1533	178	3	11	7	6	16	13
K05801	DnaJ like chaperone protein	483	1504	331	84	992	155	7	2128	311	40	26	76	44	41	16
K05802	potassium efflux system protein KefA	25	18	27	4	901	6	0	32	36	0	1	3	0	1	3
K05803	lipoprotein NlpI	19	16	22	3	1	3	0	24	161	0	1	2	0	0	2
K01044	carboxylesterase [EC:3.1.1.1]	11	4	32	13	1209	18	13	110	203	1	0	1	1	1	56
K01045	arylesterase / paraoxonase [EC:3.1.1.2 3.1.8.1];arylesterase [EC:3.1.1.2]	0	0	0	0	0	0	0	2	0	0	0	0	0	0	0
K01046	triacylglycerol lipase [EC:3.1.1.3]	336	83	268	97	6700	177	2875	452	3680	25	33	79	21	55	201
K02068	putative ABC transport system ATP-binding protein	5035	4652	4313	7788	4637	4604	4005	1134	3129	2749	4970	492	6501	3060	2051
K04561	nitric oxide reductase, cytochrome b-containing subunit I [EC:1.7.2.5];nitric-oxide reductase, cytochrome b-containing subunit I [EC:1.7.99.7]	225	15	151	471	4336	95	2822	770	3709	4	6	2	18	8	25
K01042	L-seryl-tRNA(Ser) seleniumtransferase [EC:2.9.1.1]	659	1919	4866	783	1127	5743	353	3864	2729	318	483	1270	291	1230	371
K05568	multicomponent Na+:H+ antiporter subunit D	1190	1017	2541	1176	860	2506	553	2751	1057	1121	2480	4059	1236	2492	3039
K05567	multicomponent Na+:H+ antiporter subunit C	1094	205	1161	476	426	678	289	455	357	100	162	363	119	224	1121
K14274	D-xylonolactonase	0	5	1	0	0	0	0	2	0	2	2	2	3	2	1
K02062	thiamine transport system ATP-binding protein	21	28	146	79	83	74	5	713	66	1	4	4	2	7	7
K05245	L-carnitine/gamma-butyrobetaine antiporter	1	0	22	2	0	3	0	0	0	0	0	2	0	0	1
K05564	multicomponent K+:H+ antiporter subunit G	9	12	135	77	983	76	6	706	104	2	5	2	3	7	29
K01048	lysophospholipase [EC:3.1.1.5]	4531	4489	2998	7218	3752	2093	3677	3174	1585	2842	4911	413	6535	2909	1973
K02066	putative ABC transport system permease protein	2042	2566	1490	363	1942	413	129	6303	548	1303	649	1753	1420	1136	3786
K01322	prolyl oligopeptidase [EC:3.4.21.26]	1556	1581	970	46	41	222	25	1793	484	849	188	1158	759	486	2920
K02065	putative ABC transport system ATP-binding protein	2011	2513	1420	305	1918	374	119	6012	526	1216	520	1669	1260	968	3527
K05560	multicomponent K+:H+ antiporter subunit C	9	12	135	77	983	76	6	706	104	2	5	2	3	7	29
K02243	competence protein ComGA	1332	581	2517	3176	799	2981	1375	873	1493	1800	2202	659	2139	2046	1337
K08930	light-harvesting protein B-800-850 alpha chain	0	0	0	0	2	0	0	0	0	0	0	0	0	0	0
K02679	prepilin peptidase dependent protein A	18	16	23	3	1	3	0	23	1	0	1	2	0	0	2
K02676	type IV pilus assembly protein PilZ	7	2	20	7	615	9	12	89	180	0	0	1	2	1	52
K02674	type IV pilus assembly protein PilY1	9	4	29	9	867	13	0	87	344	2	1	1	2	2	25
K02672	type IV pilus assembly protein PilW	215	6	27	11	5056	18	2813	96	3690	2	1	0	2	1	69
K02241	competence protein ComFB	74	176	135	17	27	108	7	772	79	563	403	1462	683	647	1013
K02670	twitching motility protein PilU	11	5	38	13	506	17	12	153	185	0	1	1	3	1	53
K02671	type IV pilus assembly protein PilV	217	3	30	12	5053	18	2814	105	3992	1	1	0	2	1	71
K00810	None	5	2	8	6	2	9	4	7	4	0	0	0	0	0	0
K00811	aspartate aminotransferase [EC:2.6.1.1]	702	1754	402	282	218	465	93	1901	243	973	353	1708	930	784	3078
K00812	aspartate aminotransferase [EC:2.6.1.1]	2449	2386	3219	1202	1311	1331	405	5435	977	959	911	4448	1093	2393	4357
K00813	aspartate aminotransferase [EC:2.6.1.1]	19	17	24	3	1	3	0	27	161	0	1	2	0	0	2
K00817	histidinol-phosphate aminotransferase [EC:2.6.1.9]	8944	9843	13874	11192	16378	13507	11278	15614	14432	8024	11153	10021	12366	10695	6960
K00818	acetylornithine aminotransferase [EC:2.6.1.11]	5970	5310	4561	7376	8820	3769	6604	1982	6349	3623	5106	1430	7383	3407	2045
K00819	ornithine--oxo-acid transaminase [EC:2.6.1.13]	39	57	159	87	89	108	7	798	88	33	36	47	339	40	3336
K02530	DeoR family transcriptional regulator, lactose phosphotransferase system repressor	151	229	977	1647	513	823	1028	766	284	1769	2132	619	2011	2027	323
K02245	competence protein ComGC	1347	582	2538	3194	830	3014	1376	889	1509	1800	2203	663	2140	2047	1340
K02244	competence protein ComGB	1197	321	1522	1392	228	1984	180	97	1097	46	63	35	220	24	1008
K01499	methenyltetrahydromethanopterin cyclohydrolase [EC:3.5.4.27]	2	2	16	12	8	9	0	71	6	0	0	0	2	0	2
K01493	dCMP deaminase [EC:3.5.4.12]	3859	4878	9881	4677	2034	10968	1976	9083	4992	5078	6117	9523	5625	7583	8003
K01492	phosphoribosylaminoimidazolecarboxamide formyltransferase [EC:2.1.2.3]	71	141	86	22	12	46	7	514	37	55	101	152	104	92	123
K01491	methylenetetrahydrofolate dehydrogenase (NADP+) / methenyltetrahydrofolate cyclohydrolase [EC:1.5.1.5 3.5.4.9]	19604	20097	29919	23910	22779	30329	17171	25272	23548	15643	22069	19548	24217	21017	18858
K01497	GTP cyclohydrolase II [EC:3.5.4.25]	1434	58	962	513	9423	259	5655	898	7564	11	14	10	28	19	604
K01496	phosphoribosyl-AMP cyclohydrolase [EC:3.5.4.19]	4696	5646	8716	8900	6197	9728	4730	3607	5329	4583	7189	894	8683	5546	1924
K01495	GTP cyclohydrolase I [EC:3.5.4.16]	3478	4557	8688	1517	7797	10369	3180	7655	8945	2152	3038	4884	2629	3692	6097
K01494	dCTP deaminase [EC:3.5.4.13]	5983	5247	5341	7281	9193	4448	6522	4658	6899	2783	4981	309	6547	2982	1558
K02418	flagellar protein FliO/FliZ	326	357	853	420	1190	912	145	1030	614	751	579	1956	908	893	1344
K02419	flagellar biosynthetic protein FliP	983	986	2553	1118	1451	1487	409	3924	1106	1505	1377	5246	1454	2683	2315
K02412	flagellum-specific ATP synthase [EC:3.6.3.14]	925	954	2481	1066	1452	1479	407	3848	1099	1431	1334	5167	1367	2657	2188
K02413	flagellar FliJ protein	943	880	2313	987	1330	1377	395	2681	1004	1405	1187	4979	1350	2569	1895
K02410	flagellar motor switch protein FliG	983	986	2554	1118	1452	1488	409	3925	1106	1508	1378	5248	1455	2684	2315
K02411	flagellar assembly protein FliH	781	733	1898	902	1313	1116	334	2640	874	1156	957	4672	1101	2403	1477
K02416	flagellar motor switch protein FliM	979	969	2550	1117	1450	1487	409	3879	1106	1498	1374	5240	1450	2674	2315
K02417	flagellar motor switch protein FliN/FliY	1131	1093	2668	1212	1465	1431	457	4050	1126	1580	1374	5901	1442	2933	2300
K02414	flagellar hook-length control protein FliK	243	255	479	392	1135	467	86	682	444	162	142	450	140	226	638
K02415	flagellar FliL protein	151	307	497	424	2090	486	96	1849	676	113	212	422	267	238	721
K00120	None	0	0	0	0	0	0	0	1	0	0	0	0	0	0	29
K00121	S-(hydroxymethyl)glutathione dehydrogenase / alcohol dehydrogenase [EC:1.1.1.284 1.1.1.1]	1485	238	1380	651	10471	409	6179	2210	7711	58	134	147	67	142	1513
K13058	mannosylfructose-phosphate synthase [EC:2.4.1.246]	6	1	15	6	9	7	1	49	6	3	1	2	4	8	1
K13059	N-acetylhexosamine 1-kinase [EC:2.7.1.162]	1	0	0	0	0	0	0	0	0	0	0	0	0	0	0
K13727	phenolic acid decarboxylase [EC:4.1.1.-]	28	2	25	22	34	33	3	16	17	1	1	5	1	1	3
K13057	trehalose synthase [EC:2.4.1.245]	1	1	10	1	2	2	0	6	2	1	0	1	0	2	1
K13051	beta-aspartyl-peptidase (threonine type) [EC:3.4.19.5]	17	21	162	90	94	96	5	843	236	2	5	5	3	9	6
K13052	cell division protein DivIC	1913	983	3419	3204	999	4636	1387	1726	2009	2375	4123	1574	2985	2789	2976
K00435	peroxiredoxin [EC:1.11.1.-]	19	4	47	29	41	51	2	100	25	2	2	6	1	3	4
K03238	translation initiation factor 2 subunit 2;translation initiation factor eIF-2 beta subunit	0	0	0	0	0	1	0	0	0	0	0	0	2	0	0
K03231	elongation factor EF-1 alpha subunit [EC:3.6.5.3];elongation factor 1-alpha	5	3	3	1	1	2	2	2	2	8	6	32	17	4	18
K03230	type III secretion protein SctV	15	16	33	5	220	10	0	63	3	2	2	4	5	9	3
K03232	elongation factor 1-beta;elongation factor EF-1 beta subunit	0	0	0	0	0	1	0	0	0	0	0	0	2	0	0
K12059	conjugal transfer pilus assembly protein TrbC	1	2	10	5	4	8	0	59	50	0	1	0	2	0	1
K03237	translation initiation factor 2 subunit 1;translation initiation factor eIF-2 alpha subunit	0	0	0	0	0	1	0	0	0	0	0	0	2	0	0
K03236	translation initiation factor eIF-1A;translation initiation factor 1A	0	0	0	0	0	1	0	0	0	0	0	0	2	0	0
K12058	conjugal transfer mating pair stabilization protein TraN	45	5	53	5	4	16	0	74	51	1	3	1	4	2	2
K12239	dihydroaeruginoic acid synthetase	3	0	1	0	250	1	0	0	31	0	0	0	0	0	0
K12238	pyochelin biosynthesis protein PchD	3	0	1	0	250	1	0	0	31	0	0	0	0	0	0
K12234	coenzyme F420-0:L-glutamate ligase / coenzyme F420-1:gamma-L-glutamate ligase [EC:6.3.2.31 6.3.2.34];F420-0:gamma-glutamyl ligase [EC:6.3.2.-]	21	48	34	20	19	30	4	159	24	32	19	51	55	20	31
K13942	5,10-methenyltetrahydromethanopterin hydrogenase [EC:1.12.98.2]	0	0	0	0	0	1	0	0	0	0	0	0	2	0	0
K13940	dihydroneopterin aldolase / 2-amino-4-hydroxy-6-hydroxymethyldihydropteridine diphosphokinase [EC:4.1.2.25 2.7.6.3]	6094	5896	6809	7934	4659	7312	4120	3973	4030	4095	7879	5539	7853	6297	4025
K13941	2-amino-4-hydroxy-6-hydroxymethyldihydropteridine diphosphokinase / dihydropteroate synthase [EC:2.7.6.3 2.5.1.15]	0	0	2	0	0	0	0	0	0	0	0	0	0	0	0
K05992	None	12	72	145	171	93	75	195	101	62	8	24	23	4	29	12
K03540	ribonuclease P protein subunit RPR2 [EC:3.1.26.5];ribonuclease P subunit RPR2 [EC:3.1.26.5]	0	0	0	0	0	1	0	0	0	0	0	0	2	0	0
K06331	spore coat protein I	85	117	276	34	36	279	12	428	127	465	277	1266	490	605	339
K06330	spore coat protein H	14	15	62	7	3	110	0	12	43	8	10	16	4	19	8
K07138	None	1882	2267	3576	3005	1163	3108	1611	7877	1370	3781	3918	7541	3962	5678	2301
K07139	None	2051	3468	3160	2874	1420	3674	1541	5382	1698	4183	5263	6214	4396	5348	3874
K11811	arsenical resistance protein ArsH	222	16	162	97	5105	96	2821	838	3605	2	6	3	5	8	75
K07132	None	22	115	33	6	4	7	3	239	10	43	46	42	74	48	2868
K07133	None	13883	23335	52594	27026	13512	59563	15571	31634	28365	28218	35979	20958	34549	36327	12618
K07130	None	1506	1863	3606	3007	1697	1766	1752	6366	1200	3616	5191	7397	3824	5906	3739
K07131	None	966	21	739	7	4	107	2	88	94	9	7	33	17	8	19
K07137	None	4657	7789	15468	5903	4150	16062	3102	14479	7099	8507	11358	15861	9410	13589	7419
K07134	None	0	0	0	0	0	1	0	0	0	0	0	0	2	0	0
K07135	None	0	0	0	0	0	1	0	0	0	0	0	0	2	0	0
K01866	tyrosyl-tRNA synthetase [EC:6.1.1.1]	9836	10031	14997	11872	11123	15189	8500	12628	11785	7786	11010	9750	12072	10491	9868
K01867	tryptophanyl-tRNA synthetase [EC:6.1.1.2]	9804	10000	14913	11858	11127	15161	8488	12574	11767	7779	10994	9705	12066	10470	9410
K01865	None	0	1	0	0	0	0	0	7	0	2	3	1	1	9	1
K01868	threonyl-tRNA synthetase [EC:6.1.1.3]	9836	10055	15129	11872	11393	15373	8494	12709	11890	7830	11065	9803	12123	10530	9919
K01869	leucyl-tRNA synthetase [EC:6.1.1.4]	9790	9997	14907	11850	11121	15153	8488	12530	11760	7778	10995	9707	12066	10470	9407
K06140	regulator of nucleoside diphosphate kinase	33	16	161	85	1243	89	6	762	295	3	6	7	9	16	8
K04766	acetoin utilization protein AcuA [EC:2.3.1.-]	0	0	3	3	1	2	1	2	1	0	0	0	0	0	506
K04767	acetoin utilization protein AcuB	195	412	1135	1710	583	1357	1142	1545	727	1805	2179	855	2044	2112	936
K04764	integration host factor subunit alpha	356	176	317	231	5166	133	2906	2447	3791	145	83	226	118	150	194
K04762	ribosome-associated heat shock protein Hsp15	928	1741	459	227	5178	261	2935	3830	3871	1048	287	1482	941	670	3091
K04763	integrase/recombinase XerD	10953	10741	19854	12345	11915	20804	8512	12716	14213	8659	11408	11080	12901	11742	11197
K04760	transcription elongation factor GreB	85	95	74	116	914	26	79	1535	351	187	116	221	190	185	281
K04761	LysR family transcriptional regulator, hydrogen peroxide-inducible genes activator	815	1667	522	270	5234	281	2914	4493	3905	228	110	345	496	230	2982
K04768	acetoin utilization protein AcuC	9	5	29	16	12	34	13	49	23	2	5	1	2	4	510
K04769	AbrB family transcriptional regulator, stage V sporulation protein T	1426	1286	2834	1136	627	2367	603	3071	1072	1872	3249	6636	2002	3946	3624
K08313	fructose-6-phosphate aldolase 1 [EC:4.1.2.-]	326	1219	5067	1523	803	6113	1021	1746	2535	1784	2253	723	1944	2545	383
K08312	ADP-ribose diphosphatase [EC:3.6.1.-]	25	17	29	4	901	7	0	37	182	0	1	3	1	1	2
K08311	putative (di)nucleoside polyphosphate hydrolase [EC:3.6.1.-]	287	40	251	106	5157	121	2822	963	3774	6	11	10	13	21	83
K08310	dATP pyrophosphohydrolase [EC:3.6.1.-]	15	4	41	11	5	13	0	75	7	0	1	3	1	2	6
K08317	uncharacterized oxidoreductase [EC:1.1.-.-]	4168	4082	2000	6815	3472	1314	3684	571	926	2679	4783	142	6397	2752	1321
K08316	ribosomal RNA small subunit methyltransferase D [EC:2.1.1.171];ribosomal RNA small subunit methyltransferase D [EC:2.1.1.52]	5925	6887	10001	8965	10225	11146	7615	6196	9528	5337	9486	2391	9622	6911	4102
K08315	hydrogenase 3 maturation protease [EC:3.4.-.-];hydrogenase 3 maturation protease [EC:3.4.23.51]	12	2	22	3	4	4	0	1	0	2	0	2	2	0	2
K08314	fructose-6-phosphate aldolase 2 [EC:4.1.2.-]	20	26	76	28	12	12	5	20	6	17	17	46	24	11	10
K08319	putative dehydrogenase [EC:1.1.-.-]	1	0	22	0	1	3	0	1	1	0	0	2	0	1	1
K08318	putative dehydrogenase [EC:1.1.-.-]	5	0	22	3	1	3	0	0	0	0	0	2	0	0	1
K14392	sodium/pantothenate symporter	90	172	92	108	12	108	81	1703	45	151	71	199	117	102	596
K14393	cation/acetate symporter	255	19	123	58	5340	86	2835	309	3763	8	9	9	11	17	1086
K14645	serine protease [EC:3.4.21.-]	971	19	770	29	114	137	16	104	301	4	6	2	7	8	6
K14647	minor extracellular serine protease Vpr [EC:3.4.21.-]	0	0	1	1	0	0	0	0	1	0	0	0	0	0	10
K01689	enolase [EC:4.2.1.11]	10238	10465	15564	12228	11532	16646	8511	14324	12162	7871	11056	9840	12146	10630	9270
K01686	mannonate dehydratase [EC:4.2.1.8]	1012	972	2352	890	359	1140	445	3180	739	1970	1453	5229	1707	2996	1594
K01687	dihydroxy-acid dehydratase [EC:4.2.1.9]	8766	8296	10500	9670	10909	7951	7401	13988	8868	6869	9577	12484	10640	9795	9427
K01684	galactonate dehydratase [EC:4.2.1.6]	83	106	358	53	597	278	8	378	136	187	282	279	261	242	371
K01685	altronate hydrolase [EC:4.2.1.7]	1725	3276	9720	1330	907	9897	651	9792	4407	1651	1644	5347	1406	3781	1768
K01682	aconitate hydratase 2 [EC:4.2.1.3]	1200	35	783	24	5062	119	2815	185	3782	4	3	5	4	6	73
K01681	aconitate hydratase 1 [EC:4.2.1.3]	7429	8558	12273	10143	15703	12662	10938	10738	13858	7614	10827	9348	11802	10326	8705
K02889	large subunit ribosomal protein L21e	0	0	0	0	0	1	0	0	0	0	0	0	2	0	0
K02888	large subunit ribosomal protein L21	9781	10031	14952	12011	11205	15157	8681	12465	11771	7707	10916	9655	11925	10353	9203
K02885	large subunit ribosomal protein L19e	0	0	0	0	0	1	0	0	0	0	0	0	2	0	0
K02884	large subunit ribosomal protein L19	9790	9997	14907	11850	11120	15152	8488	12530	11760	7775	10992	9707	12064	10467	9399
K02887	large subunit ribosomal protein L20	9759	9898	14801	11676	11029	15123	8294	12348	11732	7699	10901	9561	11866	10405	9358
K02886	large subunit ribosomal protein L2	9790	9997	14907	11851	11121	15153	8488	12530	11760	7778	10995	9707	12066	10470	9406
K02881	large subunit ribosomal protein L18	9784	9988	14907	11850	11121	15153	8487	12518	11760	7709	10928	9596	11873	10441	9390
K02883	large subunit ribosomal protein L18e	0	0	0	0	0	1	0	0	0	0	0	0	2	0	0
K02086	DNA replication protein	1235	445	1592	1755	452	2002	380	396	1117	56	105	60	232	94	1036
K02081	DeoR family transcriptional regulator, aga operon transcriptional repressor	380	1034	1272	1493	419	1115	1005	1531	610	1890	2298	794	2093	2113	621
K02080	galactosamine-6-phosphate isomerase [EC:5.3.1.-]	1	0	21	0	0	3	0	0	0	0	0	2	0	0	1
K02083	allantoate deiminase [EC:3.5.3.9]	28	7	43	406	14	15	71	33	10	13	7	8	23	8	578
K02082	tagatose-6-phosphate ketose/aldose isomerase [EC:5.-.-.-]	166	209	1361	1496	417	1607	1085	747	698	1773	2136	640	2014	2014	414
K03428	magnesium-protoporphyrin O-methyltransferase [EC:2.1.1.11]	959	12	725	6	6	94	0	39	90	2	1	1	1	2	1
K03429	1,2-diacylglycerol 3-glucosyltransferase [EC:2.4.1.157]	2613	1207	2844	1745	393	2397	439	1744	1348	292	306	1123	441	507	787
K03424	TatD DNase family protein [EC:3.1.21.-]	10768	11973	19801	13494	17833	20655	12423	16799	17972	10884	13813	12270	15703	13862	10790
K03932	polyhydroxybutyrate depolymerase	28	31	58	40	21	44	11	322	24	77	93	71	140	133	208
K03933	chitin-binding protein	22	3	13	5	1054	8	3	12	197	1	0	0	0	1	3
K03930	putative tributyrin esterase [EC:3.1.1.-]	24	41	158	34	28	180	24	87	57	151	183	241	211	122	329
K03931	putative isomerase	7	1	21	0	0	4	0	1	1	0	0	3	0	0	1
K02339	DNA polymerase III subunit chi [EC:2.7.7.7]	280	85	204	195	5152	110	2899	2167	3770	114	30	154	54	61	126
K02338	DNA polymerase III subunit beta [EC:2.7.7.7]	9800	10065	14972	12020	11207	15160	8684	12622	11776	7785	11018	9729	12068	10497	9422
K02337	DNA polymerase III subunit alpha [EC:2.7.7.7]	9999	10599	15032	12037	11188	15153	8684	13775	11774	7698	10896	9515	12285	10438	9141
K02336	DNA polymerase II [EC:2.7.7.7]	20	2	27	4	901	6	0	20	196	0	0	3	0	1	1
K02335	DNA polymerase I [EC:2.7.7.7]	9829	10090	15106	11879	11147	15358	8502	12856	11841	7815	11046	9765	12116	10509	9465
K02334	DNA polymerase bacteriophage-type [EC:2.7.7.7]	3610	3055	8851	2175	1048	7283	759	9262	3605	2647	2241	10185	2442	5715	2727
K02330	DNA polymerase beta subunit [EC:2.7.7.7 4.2.99.-]	0	0	0	0	0	0	0	2	0	0	0	0	0	0	0
K03688	ubiquinone biosynthesis protein	5315	6127	9738	9601	10368	10820	7616	5403	9541	5309	9172	2914	9616	6717	4080
K03689	cytochrome b6-f complex subunit 8	958	11	717	2	0	90	0	10	84	2	0	1	1	2	0
K03680	translation initiation factor eIF-2B subunit delta;translation initiation factor eIF-2B delta subunit	0	5	1	0	0	0	0	2	0	2	2	2	3	2	1
K03683	ribonuclease T [EC:3.1.13.-]	233	19	36	6	5050	14	2814	58	3688	1	1	3	1	1	71
K03684	ribonuclease D [EC:3.1.13.5]	5898	5661	8998	7269	9597	9299	6533	4491	8943	2802	5099	264	6641	3604	1658
K03685	ribonuclease III [EC:3.1.26.3]	9788	9995	14906	11848	11117	15153	8488	12505	11759	7776	10995	9707	12065	10469	9407
K03686	molecular chaperone DnaJ	17302	17176	26786	20252	16402	27993	12562	19179	18223	12328	20560	15350	20766	17618	14625
K03687	molecular chaperone GrpE	9788	9989	14906	11847	11121	15154	8488	12527	11758	7680	10868	9512	11985	10404	9132
K07301	inner membrane protein	3604	3388	5725	4807	6967	4238	5694	6480	5648	5655	7570	8540	6511	8132	4156
K07300	Ca2+:H+ antiporter	1966	62	1586	63	836	258	8	423	264	10	12	28	7	19	28
K07303	isoquinoline 1-oxidoreductase, beta subunit [EC:1.3.99.16]	50	61	123	62	1914	60	3	660	265	149	188	142	282	265	419
K07302	isoquinoline 1-oxidoreductase, alpha subunit [EC:1.3.99.16]	50	61	126	63	1918	63	3	682	265	149	187	142	282	265	418
K07305	peptide-methionine (R)-S-oxide reductase [EC:1.8.4.12]	3435	470	3422	1852	5548	2711	3081	1561	5103	77	175	331	483	215	1196
K07304	peptide-methionine (S)-S-oxide reductase [EC:1.8.4.11]	3546	594	4062	3619	7180	2671	4365	2001	5328	1835	2237	741	2491	2056	5469
K07307	anaerobic dimethyl sulfoxide reductase subunit B (DMSO reductase iron- sulfur subunit)	48	64	69	21	10	61	11	35	182	88	126	142	226	209	122
K07306	anaerobic dimethyl sulfoxide reductase subunit A [EC:1.8.5.3];anaerobic dimethyl sulfoxide reductase subunit A [EC:1.8.99.-]	38	48	38	5	4	35	3	27	164	34	26	52	120	36	51
K07309	putative dimethyl sulfoxide reductase subunit YnfE [EC:1.8.99.-];Tat-targeted selenate reductase subunit YnfE [EC:1.97.1.9]	15	17	29	2	0	18	2	2	8	17	13	27	60	16	26
K07308	anaerobic dimethyl sulfoxide reductase subunit C (DMSO reductase anchor subunit)	48	56	85	29	16	68	12	95	37	61	112	112	207	182	125
K02617	phenylacetic acid degradation protein	11	1	29	5	3	3	0	13	0	0	0	2	0	0	1
K02610	phenylacetic acid degradation protein	26	9	48	26	560	38	9	146	63	2	4	1	3	4	31
K02963	small subunit ribosomal protein S18	9782	9983	14900	11850	11119	15151	8487	12509	11759	7708	10930	9593	11870	10444	9390
K02612	phenylacetic acid degradation protein	26	9	48	26	561	38	9	146	63	2	4	1	3	4	31
K02961	small subunit ribosomal protein S17	9652	9870	14718	11756	11102	15091	8481	12280	11709	7473	10670	9199	11670	10267	8919
K09686	antibiotic transport system permease protein	17346	17232	32628	15973	23458	33290	15117	30323	28100	12447	16248	26818	16666	19034	21570
K09687	antibiotic transport system ATP-binding protein	31546	27778	53357	41702	26861	52700	23262	37973	30950	31319	47437	51733	45782	47940	38830
K09684	purine catabolism regulatory protein	31	23	85	36	28	101	14	136	56	21	15	23	18	37	1028
K09685	purine operon repressor	1482	641	2069	1774	473	2554	311	890	1412	599	430	2217	721	1032	1458
K09682	MarR family transcriptional regulator, protease production regulatory protein HPr	0	0	3	2	0	1	1	0	0	0	0	0	0	0	506
K09683	hut operon positive regulatory protein	0	0	0	1	0	0	0	0	0	0	0	0	0	0	7
K09680	type II pantothenate kinase [EC:2.7.1.33]	486	1523	184	2	3	94	2	1378	62	63	54	122	90	68	531
K09681	LysR family transcriptional regulator, transcription activator of glutamate synthase operon	3	1	4	5	1	5	3	3	3	0	0	0	0	0	500
K09688	capsular polysaccharide transport system permease protein	11	57	30	8	7	8	1	219	6	2	4	1	2	5	1
K09689	capsular polysaccharide transport system ATP-binding protein	12	57	29	6	4	8	2	213	6	2	4	1	2	5	1
K05962	protein-histidine pros-kinase [EC:2.7.13.1]	0	1	12	2	0	1	0	29	1	0	0	0	1	0	1
K05961	None	0	0	0	1	0	0	0	0	0	0	0	0	0	0	6
K05967	hypothetical protein	72	88	220	282	208	391	77	181	196	37	87	314	28	180	622
K05966	triphosphoribosyl-dephospho-CoA synthase [EC:2.7.8.25]	1203	394	1567	1159	320	1956	284	249	1087	37	86	62	119	70	448
K11159	carotenoid cleavage dioxygenase	2	2	21	8	9	11	0	66	7	0	0	0	0	2	1
K05964	holo-ACP synthase [EC:2.7.7.61]	1215	393	1555	1536	314	1953	297	178	1086	35	83	73	129	54	447
K05968	None	6	1	0	0	0	0	0	1	0	2	1	2	1	1	0
K00309	None	34	28	72	24	5	28	9	112	18	7	11	32	5	15	19
K00658	2-oxoglutarate dehydrogenase E2 component (dihydrolipoamide succinyltransferase) [EC:2.3.1.61]	365	132	397	182	4975	217	2845	1361	3839	119	173	148	509	211	6464
K00304	sarcosine oxidase, subunit delta [EC:1.5.3.1]	16	21	213	117	1016	122	16	928	133	3	8	4	6	12	12
K00305	sarcosine oxidase, subunit gamma [EC:1.5.3.1]	16	20	203	111	1012	118	15	893	132	3	8	4	6	11	12
K00655	1-acyl-sn-glycerol-3-phosphate acyltransferase [EC:2.3.1.51]	12199	10265	14016	11866	16048	11738	9504	16419	13746	7618	11735	14480	12028	11448	14740
K00652	8-amino-7-oxononanoate synthase [EC:2.3.1.47]	1902	1876	1253	162	5179	368	2864	3085	3975	969	341	1428	971	681	3133
K00301	sarcosine oxidase [EC:1.5.3.1]	24	29	277	169	973	183	21	1428	224	5	10	4	7	18	446
K00302	sarcosine oxidase, subunit alpha [EC:1.5.3.1]	67	84	445	142	1032	343	22	1107	216	57	84	111	63	82	594
K00303	sarcosine oxidase, subunit beta [EC:1.5.3.1]	41	65	399	203	1729	214	26	1627	243	14	28	46	23	35	541
K10828	quaternary-amine-transporting ATPase [EC:3.6.3.32]	203	1	3	2	3851	5	2802	2	3478	1	0	0	0	0	18
K06431	small acid-soluble spore protein N (minor)	0	0	1	1	0	0	0	0	0	0	0	0	0	0	7
K06432	small acid-soluble spore protein O (minor)	0	0	1	1	0	0	0	0	0	0	0	0	0	0	7
K06433	small acid-soluble spore protein P (minor)	0	0	1	1	0	0	0	0	0	0	0	0	0	0	7
K06434	small acid-soluble spore protein (thioredoxin-like protein)	18	11	25	11	1	7	7	17	5	4	6	23	6	9	452
K06436	spore coat assemly protein	123	220	228	399	257	130	216	659	98	417	257	1236	439	628	322
K10820	monosaccharide-transporting ATPase [EC:3.6.3.17]	0	5	2	1	0	1	0	2	0	4	6	2	3	4	2
K06439	similar to spore coat protein	0	0	1	1	0	0	0	0	0	0	0	0	0	0	0
K10826	Fe3+-transporting ATPase [EC:3.6.3.30]	0	1	2	0	0	3	0	14	0	1	0	0	0	1	0
K09167	hypothetical protein	641	306	1187	960	201	1309	165	160	848	64	99	165	198	75	1044
K14117	energy-converting hydrogenase B subunit H	0	0	0	0	0	1	0	0	0	0	0	0	2	0	0
K14257	FADH2 O2-dependent halogenase II [EC:1.14.14.-]	8	1	4	0	794	3	0	1	65	0	0	0	0	0	0
K01308	g-D-glutamyl-meso-diaminopimelate peptidase [EC:3.4.19.11]	146	191	342	63	52	204	13	582	159	581	422	1426	617	722	1029
K01303	acylaminoacyl-peptidase [EC:3.4.19.1]	115	140	957	1451	392	1017	999	551	399	1745	2102	606	1911	1956	318
K01301	glutamate carboxypeptidase II [EC:3.4.17.21]	0	2	9	8	4	10	0	68	3	0	0	0	0	0	0
K01305	beta-aspartyl-dipeptidase (metallo-type) [EC:3.4.19.-]	228	351	932	1976	644	696	1346	1942	368	1939	2295	1122	2031	2266	464
K01304	pyroglutamyl-peptidase [EC:3.4.19.3]	7337	6585	11599	10323	5499	12389	5111	4828	6923	4694	7284	1919	8530	5903	2669
K02658	twitching motility two-component system response regulator PilH	3090	38	2180	19	5056	289	2813	131	3785	6	2	3	6	7	69
K00672	formylmethanofuran--tetrahydromethanopterin N-formyltransferase [EC:2.3.1.101]	2	2	16	12	8	10	0	71	6	1	0	0	4	0	2
K02650	type IV pilus assembly protein PilA	3711	1056	3148	788	5771	1003	3240	1959	4401	718	693	2715	750	1534	1530
K02651	pilus assembly protein Flp/PilA	92	124	235	218	1443	151	89	2342	155	141	66	208	107	101	78
K02652	type IV pilus assembly protein PilB	2715	795	2800	854	4987	1189	3246	1982	4404	1200	1292	3494	1460	2107	1976
K02653	type IV pilus assembly protein PilC	2554	1469	4438	3065	6185	2586	4500	4319	5126	3558	3968	7300	3719	5787	3352
K02654	leader peptidase (prepilin peptidase) / N-methyltransferase [EC:3.4.23.43 2.1.1.-]	14635	13491	22932	16958	19882	21701	13942	12938	19311	9932	15337	15020	17500	15012	9026
K02656	type IV pilus assembly protein PilF	221	20	28	11	5052	16	2814	116	3692	1	2	1	3	2	71
K05685	macrolide transport system ATP-binding/permease protein [EC:3.6.3.-];macrolide transport system permease protein	255	97	279	145	5546	149	2824	1553	3704	5	11	7	10	19	80
K00878	hydroxyethylthiazole kinase [EC:2.7.1.50]	6815	7252	7990	10690	9009	7057	6835	8719	7494	6566	10242	7901	10553	8950	5479
K00879	L-fuculokinase [EC:2.7.1.51]	48	39	72	27	6	25	6	109	17	194	246	418	321	139	391
K00872	homoserine kinase [EC:2.7.1.39]	7468	7145	11943	10236	5252	11754	5251	7916	6535	5392	7859	5286	9061	7616	3096
K00873	pyruvate kinase [EC:2.7.1.40]	11713	10602	16580	12199	8034	15379	5828	12391	8522	7550	10881	9475	11703	10371	9123
K00870	protein kinase [EC:2.7.1.37]	958	11	717	2	0	90	0	10	84	2	0	1	1	2	0
K00876	uridine kinase [EC:2.7.1.48]	5104	6319	7223	3793	1427	6323	1169	10268	3404	4715	4601	13241	4431	7150	8537
K00874	2-dehydro-3-deoxygluconokinase [EC:2.7.1.45]	3145	4340	9223	2120	2378	8531	996	8707	3954	3422	4208	10356	3346	6365	6851
K00875	D-ribulokinase [EC:2.7.1.47]	1	10	116	71	79	68	5	668	65	1	3	1	2	6	4
K04487	cysteine desulfurase [EC:2.8.1.7]	9324	7287	22832	8636	10061	23122	6123	15863	15373	6719	9930	17612	7780	13124	12747
K04486	histidinol-phosphatase (PHP family) [EC:3.1.3.15]	3227	4048	11565	7619	3009	10818	4113	9773	4853	8339	10664	13316	9038	12791	6118
K04485	DNA repair protein RadA/Sms	9412	8721	9909	10137	10169	9021	7462	10535	9204	5938	8723	8960	10050	7859	8991
K04484	DNA repair protein RadB	0	0	0	0	0	1	0	0	0	0	0	0	2	0	0
K04483	DNA repair protein RadA	0	0	0	0	0	1	0	0	0	0	0	0	2	0	0
K04480	methanol---5-hydroxybenzimidazolylcobamide Co-methyltransferase [EC:2.1.1.90]	5	8	26	1	2	12	1	13	8	0	3	1	0	1	4
K04488	nitrogen fixation protein NifU and related proteins	8588	8220	14294	11706	11018	14453	8453	10063	11406	6893	10792	8443	11233	9909	6504
K13693	glucosyl-3-phosphoglycerate synthase [EC:2.4.1.-]	7	2	14	8	4	16	7	14	7	0	1	0	0	1	1
K13694	lipoprotein Spr	59	76	53	11	5	34	0	126	21	49	50	110	89	97	2828
K13695	probable lipoprotein NlpC	14	2	23	3	1	3	0	2	1	0	1	3	0	1	1
K05977	2'-hydroxybiphenyl-2-sulfinate desulfinase [EC:3.13.1.3]	3	1	1	0	250	2	0	0	31	0	0	0	0	0	23
K09516	all-trans-retinol 13,14-reductase [EC:1.3.99.23]	1203	855	812	3	296	108	1	817	98	65	36	105	370	92	38
K02434	aspartyl-tRNA(Asn)/glutamyl-tRNA (Gln) amidotransferase subunit B [EC:6.3.5.6 6.3.5.7]	16624	13507	19130	22095	20510	18217	16042	17115	17866	12337	18455	11345	21136	15330	10393
K02435	aspartyl-tRNA(Asn)/glutamyl-tRNA (Gln) amidotransferase subunit C [EC:6.3.5.6 6.3.5.7]	16334	13237	18697	21721	20279	17756	15987	16515	17621	12042	18164	10663	20994	15024	9894
K02436	DeoR family transcriptional regulator, galactitol utilization operon repressor	17	3	3	7	4	2	1	15	1	21	44	82	47	29	77
K02437	glycine cleavage system H protein	6480	6637	5708	8027	10224	4903	6874	5075	7182	3798	5422	1985	7535	3839	5285
K05350	beta-glucosidase [EC:3.2.1.21]	5537	4733	5340	7256	4118	4883	3825	2681	3293	3325	5339	1628	7164	3680	2151
K02431	L-fucose mutarotase [EC:5.1.3.-]	89	142	527	127	123	432	12	1039	232	355	501	627	511	362	644
K08100	bilirubin oxidase [EC:1.3.3.5]	0	2	9	8	3	10	0	70	3	0	1	0	0	0	0
K02433	aspartyl-tRNA(Asn)/glutamyl-tRNA (Gln) amidotransferase subunit A [EC:6.3.5.6 6.3.5.7]	17670	13613	20528	22503	22884	18722	16096	20683	18454	12493	18639	11641	21479	15567	11681
K02438	glycogen operon protein GlgX [EC:3.2.1.-]	9941	9805	9312	14446	9230	10656	7454	4443	6664	6256	12120	1953	14013	7294	7496
K02439	thiosulfate sulfurtransferase [EC:2.8.1.1]	76	18	86	60	904	94	2	52	225	72	37	75	71	26	68
K03745	SlyX protein	247	90	201	93	5143	98	2821	1005	3765	6	9	8	6	13	78
K03744	LemA protein	7183	8330	10956	10704	11100	11882	8023	7444	10512	6672	8130	4186	10622	7151	6578
K03747	Smg protein	13	3	42	12	5	11	0	75	167	0	0	3	2	0	2
K03210	preprotein translocase subunit YajC	8548	8804	9327	10181	10185	8985	7472	10668	9157	6013	8802	9083	10094	7948	9040
K03217	preprotein translocase subunit YidC	11007	10384	16507	13424	11444	17164	8870	12748	12885	7750	10965	9588	12225	10462	10586
K03216	RNA methyltransferase, TrmH family, group 2 [EC:2.1.1.-];tRNA (cytidine/uridine-2'-O-)-methyltransferase [EC:2.1.1.207]	8933	7292	10696	11785	10681	9970	8447	9610	9558	6659	10448	8127	10763	9132	6147
K03215	RNA methyltransferase, TrmA family [EC:2.1.1.-]	306	137	220	200	5154	113	2900	2368	3772	264	190	343	390	227	348
K03742	competence/damage-inducible protein CinA	3034	3335	3674	1833	3846	1636	2034	5565	4379	2547	1905	7727	2483	4181	5409
K03219	type III secretion protein SctC	14	15	26	0	257	5	0	27	2	2	2	4	5	8	3
K03218	RNA methyltransferase, TrmH family [EC:2.1.1.-]	9052	7389	10740	10357	10372	11077	7473	9725	9831	5913	8767	8916	10054	7926	9047
K03749	DedD protein	26	18	43	12	864	12	0	96	200	1	2	4	1	3	3
K03748	SanA protein	25	19	28	3	1	3	1	33	1	10	1	10	291	1	2809
K02383	flagellar protein FlbB	10	26	0	0	0	0	1	50	0	76	68	120	198	35	16
K06327	spore coat protein D	0	0	1	1	0	1	0	0	0	0	0	0	0	0	439
K06320	spore maturation protein CgeB	442	540	841	223	91	502	18	1288	289	380	218	519	243	240	313
K07238	zinc transporter, ZIP family	4008	4038	10443	4139	3254	9469	2145	9990	4354	5584	6582	12419	5528	9097	6331
K09475	outer membrane pore protein C	11	1	22	5	1	3	0	1	1	0	0	2	0	0	1
K09474	acid phosphatase (class A) [EC:3.1.3.2]	246	835	133	14	555	30	2	958	47	77	93	87	140	138	210
K09477	citrate:succinate antiporter	1	0	22	2	0	3	0	0	0	0	0	2	0	0	1
K09476	outer membrane pore protein F	11	1	22	3	1	3	0	1	1	0	0	2	0	0	1
K09471	gamma-glutamylputrescine oxidase [EC:1.4.3.-]	24	17	141	84	1782	82	7	757	300	2	4	2	4	8	6
K09470	gamma-glutamylputrescine synthase [EC:6.3.1.11]	7	1	2	2	0	0	0	4	0	0	0	0	0	0	23
K09473	gamma-glutamyl-gamma-aminobutyrate hydrolase [EC:3.5.1.94]	7	1	1	2	0	0	0	0	0	0	0	0	0	0	0
K09472	gamma-glutamyl-gamma-aminobutyraldehyde dehydrogenase [EC:1.2.1.-]	14	5	23	15	552	14	1	106	200	0	0	2	2	1	1
K06898	None	2026	1490	2304	1284	745	2339	275	4668	952	1143	2434	2830	1442	2055	2287
K13967	N-acetylmannosamine-6-phosphate 2-epimerase / N-acetylmannosamine kinase [EC:5.1.3.9 2.7.1.60]	1	2	17	9	8	9	0	71	7	1	0	0	0	1	1
K13963	serpin B	1048	192	1047	34	47	486	6	459	251	502	309	1317	548	636	372
K00737	beta-1,4-mannosyl-glycoprotein beta-1,4-N-acetylglucosaminyltransferase [EC:2.4.1.144]	24	30	166	9	16	196	0	77	68	43	56	61	49	40	57
K05345	putative cyclase [EC:4.6.1.-]	10	0	4	2	298	2	12	19	13	8	0	3	289	1	65
K11706	iron/zinc/copper transport system ATP-binding protein	3	1	0	12	1	0	21	2	1	21	4	0	97	1	0
K11707	manganese/zinc/iron transport system substrate-binding protein	17	65	22	4	6	11	6	392	9	2	4	1	2	4	444
K11704	iron/zinc/copper transport system substrate-binding protein	3	1	0	12	1	0	21	2	1	21	4	0	97	1	0
K11705	iron/zinc/copper transport system permease protein	3	1	0	12	1	0	21	2	1	21	4	0	97	1	0
K11708	manganese/zinc/iron transport system permease protein	15	65	18	4	6	7	4	391	7	2	4	1	2	4	444
K11709	manganese/zinc/iron transport system permease protein	15	65	18	4	6	7	4	389	7	2	4	1	2	4	444
K07114	uncharacterized protein	8161	8360	6716	7542	10274	4916	6831	6990	8060	5507	6383	4993	9885	5764	8808
K07443	methylated-DNA-protein-cysteine methyltransferase related protein	1518	2117	5220	132	1373	5470	87	2490	2572	324	497	494	697	978	3412
K07116	acyl-homoserine-lactone acylase [EC:3.5.1.97];	11	3	9	1	1245	8	0	19	212	0	0	1	1	1	1
K07117	None	24	28	51	30	18	27	1	320	12	76	93	73	147	139	215
K07110	None	12	26	284	174	184	184	21	1517	153	3	11	4	6	17	11
K07447	putative holliday junction resolvase [EC:3.1.-.-]	9724	9963	14875	11798	11117	15145	8483	12440	11755	7629	10890	9494	11782	10417	9307
K07112	None	1743	1351	5344	859	10852	5753	5813	3940	9945	627	716	1947	972	1562	3685
K07113	UPF0716 protein FxsA	243	35	178	93	5140	106	2827	786	3763	3	7	6	5	9	584
K07448	restriction system protein	171	193	523	112	302	499	31	496	230	149	139	239	134	132	225
K07118	None	311	592	308	268	935	197	172	2892	339	183	74	232	210	104	685
K07119	None	243	24	205	116	5917	139	2832	936	3823	5	10	4	9	14	126
K10619	p-cumate dioxygenase [EC:1.14.12.-]	0	0	1	2	2	5	0	12	1	0	0	0	0	1	1
K10616	p-cymene monooxygenase [EC:1.14.13.-]	0	0	0	0	1	0	0	0	1	0	0	0	1	0	0
K01848	methylmalonyl-CoA mutase, N-terminal domain [EC:5.4.99.2]	51	134	184	266	215	376	67	657	185	23	63	239	23	144	30
K01849	methylmalonyl-CoA mutase, C-terminal domain [EC:5.4.99.2]	51	134	160	265	214	372	67	632	183	23	62	236	23	143	29
K01844	beta-lysine 5,6-aminomutase [EC:5.4.3.3]	88	254	318	603	377	373	458	360	205	65	135	378	65	229	132
K01845	glutamate-1-semialdehyde 2,1-aminomutase [EC:5.4.3.8]	2257	1482	2286	788	6269	2361	3123	5643	4626	963	750	2911	1254	1464	5415
K01846	methylaspartate mutase [EC:5.4.99.1]	38	175	163	350	183	31	394	254	40	31	70	117	22	103	50
K01847	methylmalonyl-CoA mutase [EC:5.4.99.2]	404	532	332	123	145	214	60	2226	171	1810	483	2531	1696	1122	4127
K01840	phosphomannomutase [EC:5.4.2.8]	6438	8597	18511	3409	11993	20352	7586	15032	15893	6775	7136	12204	7290	10156	11766
K01841	phosphoenolpyruvate phosphomutase [EC:5.4.2.9]	146	222	192	63	278	78	11	830	89	236	241	380	410	245	345
K01843	lysine 2,3-aminomutase [EC:5.4.3.2]	353	329	331	499	4478	413	3089	808	3717	176	280	428	286	425	397
K06219	S-adenosylmethionine-dependent methyltransferase	227	4	31	6	4950	12	2814	21	3686	1	1	3	1	1	47
K14203	FPRL1 inhibitory protein	0	0	0	0	0	0	0	1	0	0	0	0	0	0	0
K08483	phosphotransferase system, enzyme I, PtsI [EC:2.7.3.9]	3984	4287	11876	5489	3174	14526	2207	9653	7199	3842	5775	7155	4465	6627	4737
K08482	circadian clock protein KaiC	973	21	766	32	820	124	1	229	134	4	4	5	6	11	4
K08481	circadian clock protein KaiB	1919	26	1451	17	9	195	0	130	176	3	2	3	2	4	1
K08480	circadian clock protein KaiA	959	11	717	2	0	90	0	10	84	2	0	1	1	2	0
K08485	phosphocarrier protein NPr	14	1	23	3	1	3	0	7	161	0	0	2	0	0	24
K08484	phosphotransferase system, enzyme I, PtsP [EC:2.7.3.9]	22	16	173	93	998	95	7	806	273	2	6	5	3	9	31
K00464	lignostilbene-alpha,beta-dioxygenase [EC:1.13.11.43]	959	11	718	2	0	90	0	10	84	2	0	1	1	2	0
K00467	lactate 2-monooxygenase [EC:1.13.12.4]	3	0	7	9	3	6	5	23	3	1	1	0	0	2	433
K00466	tryptophan 2-monooxygenase [EC:1.13.12.3]	8	2	7	1	1094	7	0	10	37	0	0	0	0	1	1
K00462	biphenyl-2,3-diol 1,2-dioxygenase [EC:1.13.11.39]	1	2	17	11	10	18	3	66	8	0	2	0	0	2	2
K04509	formate dehydrogenase (cytochrome) [EC:1.2.2.1]	0	0	0	0	0	0	0	1	0	0	0	0	0	0	0
K00469	inositol oxygenase [EC:1.13.99.1]	0	2	9	8	3	8	0	67	3	0	0	0	0	0	0
K00468	None	0	0	1	0	0	1	0	2	0	0	0	0	0	0	0
K04744	LPS-assembly protein	488	589	307	234	5164	130	2900	3088	3788	117	34	156	59	66	128
K01518	bis(5'-nucleosidyl)-tetraphosphatase [EC:3.6.1.17]	0	0	2	0	1	1	0	45	3	0	0	0	0	1	0
K04748	nitric oxide reductase NorQ protein;nitric-oxide reductase NorQ protein [EC:1.7.99.7]	5	12	140	84	482	78	6	755	77	2	4	2	3	9	10
K04749	anti-sigma B factor antagonist	279	1164	4227	335	653	5510	98	1609	2359	452	403	1553	458	1277	869
K01514	exopolyphosphatase [EC:3.6.1.11]	1200	25	898	861	4224	220	2835	675	3693	6	5	5	34	10	24
K01515	ADP-ribose pyrophosphatase [EC:3.6.1.13]	9871	9577	19681	13461	8508	20848	6740	12174	10743	8692	13011	9224	13024	12387	6808
K01512	acylphosphatase [EC:3.6.1.7]	3172	2138	7846	3494	1530	8665	1328	3560	4131	2605	4665	2235	3279	3959	3609
K14623	DNA-damage-inducible protein D	566	732	436	114	174	1236	8	1422	280	220	342	434	282	356	557
K14629	enoyl reductase	0	0	1	0	0	0	0	0	0	0	0	0	0	0	0
K03918	L-lysine 6-transaminase [EC:2.6.1.36]	2	2	9	2	2	5	0	18	1	1	1	0	0	1	2
K03919	alkylated DNA repair protein [EC:1.14.11.-]	33	17	180	93	890	112	21	744	123	2	8	5	5	11	7
K12372	dipeptide transport system ATP-binding protein	226	16	161	84	4737	86	2808	733	3584	2	5	4	3	8	25
K12373	beta-hexosaminidase [EC:3.2.1.52];hexosaminidase [EC:3.2.1.52]	2498	5777	2560	562	720	2816	151	6216	2207	4598	1409	6544	3589	2994	3625
K12370	dipeptide transport system permease protein	226	16	161	84	4737	85	2808	733	3584	2	5	4	3	8	25
K12371	dipeptide transport system ATP-binding protein	226	16	166	86	4739	85	2809	743	3584	2	5	4	3	8	25
K02358	elongation factor EF-Tu [EC:3.6.5.3];elongation factor Tu	10304	10635	15380	12269	15433	15616	11371	14607	15696	7897	11221	10120	12273	10795	9814
K02351	putative membrane protein	8	7	47	26	123	38	12	119	32	2	5	2	3	5	507
K02352	drp35	0	0	0	0	0	1	0	2	0	0	0	0	0	0	0
K02355	elongation factor EF-G [EC:3.6.5.3];elongation factor G	13494	14995	23890	15105	12930	24175	10280	22472	15874	12701	17034	19050	17228	17990	13413
K02357	elongation factor EF-Ts;elongation factor Ts	9790	9997	14907	11851	11120	15152	8488	12529	11760	7777	10995	9706	12064	10470	9400
K02356	elongation factor P;elongation factor EF-P	11076	10487	17026	14434	11807	17337	9578	13222	12964	9541	13154	10333	14083	12463	10136
K13574	uncharacterized oxidoreductase [EC:1.1.1.-]	57	55	40	95	5	11	78	1291	5	112	23	150	48	53	50
K13573	proteasome accessory factor C	143	943	3623	50	404	4505	21	1028	1985	10	97	5	5	509	30
K13572	proteasome accessory factor B	148	947	3645	59	408	4527	30	1033	2005	11	100	5	6	512	31
K13571	proteasome accessory factor A [EC:6.3.2.-]	4330	4397	3596	6887	3814	3515	3672	807	2635	2684	4826	138	6400	2840	1259
K13570	prokaryotic ubiquitin-like protein Pup	4330	4396	3596	6887	3811	3515	3672	807	2635	2683	4826	138	6400	2840	1259
K12112	evolved beta-galactosidase subunit beta	7	1	22	1	0	3	0	0	0	0	0	2	0	0	1
K12113	LacI family transcriptional regulator, ebg operon repressor	7	1	21	0	0	3	0	0	0	0	0	2	0	0	1
K12111	evolved beta-galactosidase subunit alpha [EC:3.2.1.23]	9	4	22	7	0	3	0	6	1	14	9	28	10	7	9
K07323	putative toluene tolerance protein	97	155	97	113	919	24	79	1710	210	190	119	223	191	189	282
K07322	regulator of cell morphogenesis and NO signaling	824	1773	379	229	399	119	295	2229	252	1816	526	2601	1435	1164	3194
K07321	CO dehydrogenase maturation factor	441	342	602	370	399	1834	84	603	531	158	250	706	152	397	232
K07320	putative adenine-specific DNA-methyltransferase [EC:2.1.1.72]	278	73	67	108	5059	26	2892	1415	3697	113	24	151	51	54	120
K07326	hemolysin activation/secretion protein	0	1	1	1	0	0	0	5	0	0	0	0	0	1	0
K08163	MFS transporter, DHA1 family, multidrug resistance protein	12	1	22	3	1	3	0	0	0	0	0	2	0	0	1
K06180	ribosomal large subunit pseudouridine synthase D [EC:5.4.99.12];23S rRNA pseudouridine1911/1915/1917 synthase [EC:5.4.99.23]	16220	17742	27447	19087	14141	30346	10693	24282	18691	14302	19187	22080	19179	19821	20213
K06181	ribosomal large subunit pseudouridine synthase E [EC:5.4.99.12];23S rRNA pseudouridine2457 synthase [EC:5.4.99.20]	1214	43	796	37	5065	130	2816	289	3786	80	95	77	147	143	278
K06182	23S rRNA pseudouridine2604 synthase [EC:5.4.99.21];ribosomal large subunit pseudouridine synthase F [EC:5.4.99.12]	784	725	1462	803	1557	2152	368	1538	826	701	2152	1547	966	1313	2373
K06183	ribosomal small subunit pseudouridine synthase A [EC:5.4.99.12];16S rRNA pseudouridine516 synthase [EC:5.4.99.19]	5018	2734	6917	4531	6774	6571	4829	6899	7143	4053	5624	7944	4691	6407	4759
K06186	small protein A	278	73	62	106	5056	22	2892	1388	3694	113	24	151	51	54	120
K06187	recombination protein RecR	9801	10067	14969	12020	11209	15162	8683	12610	11775	7785	11019	9729	12068	10499	9417
K06188	aquaporin Z	5154	4130	2909	6902	4332	1456	3642	1340	1250	2696	4805	176	6424	2789	1327
K06189	magnesium and cobalt transporter	288	129	86	107	5058	25	2893	1572	3699	114	26	152	52	57	120
K08359	tetrathionate reductase subunit C	7	1	0	0	0	1	0	6	18	0	0	0	0	0	0
K07589	D-erythro-7,8-dihydroneopterin triphosphate epimerase [EC:5.-.-.-]	17	2	25	3	901	5	0	4	196	0	0	3	1	1	1
K07588	LAO/AO transport system kinase [EC:2.7.-.-]	246	381	258	286	241	435	95	1392	233	902	285	1451	830	655	683
K07586	hypothetical protein	106	249	701	582	359	1048	476	644	401	88	140	120	170	165	679
K07585	hypothetical protein	0	0	0	0	0	1	0	0	0	0	0	0	2	0	0
K07584	hypothetical protein	2044	2305	4407	3763	1497	3924	1967	5643	1774	3834	5487	7814	4159	6160	4227
K07583	hypothetical protein;tRNA pseudouridine synthase 10 [EC:5.4.99.-]	0	0	0	0	0	1	0	0	0	0	0	0	2	0	0
K07581	hypothetical protein	0	0	0	0	0	1	0	0	0	0	0	0	2	0	0
K07580	hypothetical protein	0	0	0	0	0	1	0	0	0	0	0	0	2	0	0
K11139	hemolysin E	0	0	1	0	0	0	0	0	0	0	0	0	0	0	0
K05989	alpha-L-rhamnosidase [EC:3.2.1.40]	2405	2024	3298	1388	650	4555	201	2708	1984	1876	2839	3097	2019	2148	2810
K05985	ribonuclease M5 [EC:3.1.26.8]	2477	1927	4549	4196	1210	3995	1758	4217	2168	2681	3013	5151	2802	4265	2202
K05987	None	6	1	0	0	0	0	0	0	0	0	0	0	0	0	0
K05986	None	6	0	3	0	2	1	0	6	1	2	1	2	5	8	1
K10843	DNA excision repair protein ERCC-3 [EC:3.6.4.12];DNA excision repair protein ERCC-3 [EC:3.6.1.-]	36	53	33	20	12	28	10	227	17	150	161	188	336	167	223
K08354	thiosulfate reductase cytochrome b subunit	1	1	22	0	3	3	0	1	0	1	0	2	0	0	1
K10844	DNA excision repair protein ERCC-2 [EC:3.6.4.12];DNA excision repair protein ERCC-2 [EC:3.6.1.-]	54	74	154	263	197	348	73	131	164	25	62	259	24	146	32
K10848	DNA excision repair protein ERCC-4 [EC:3.1.-.-]	0	0	3	2	42	1	0	17	0	0	0	0	1	0	0
K00673	arginine N-succinyltransferase [EC:2.3.1.109]	38	5	49	13	2973	22	2	82	446	2	3	6	6	11	26
K00674	2,3,4,5-tetrahydropyridine-2-carboxylate N-succinyltransferase [EC:2.3.1.117]	5062	4932	4368	7847	9418	4143	6941	3812	6678	3813	5200	2465	7368	3882	4448
K00675	N-hydroxyarylamine O-acetyltransferase [EC:2.3.1.118]	49	84	137	185	902	43	197	184	69	11	32	29	10	47	457
K00676	ribosomal-protein-alanine N-acetyltransferase [EC:2.3.1.128]	504	712	1596	1066	1109	1502	786	1337	847	688	895	2055	982	1233	2977
K00677	UDP-N-acetylglucosamine acyltransferase [EC:2.3.1.129]	3587	3911	2198	277	5189	515	2931	6759	4103	1229	492	1773	1254	968	3406
K06988	None	1008	24	819	454	1052	184	75	284	170	7	4	7	21	6	81
K06989	aspartate dehydrogenase [EC:1.4.1.21]	86	122	241	165	87	132	87	1946	122	218	173	262	193	188	294
K08351	biotin sulfoxide reductase [EC:1.-.-.-]	11	1	22	1	1	3	0	2	1	0	0	2	0	0	1
K06980	None	1305	109	1015	220	5170	256	2914	2291	3889	121	37	160	65	78	133
K06981	None	0	0	0	0	0	1	0	1	0	0	0	0	2	0	0
K06982	;pantoate kinase [EC:2.7.1.169]	0	0	0	0	0	1	0	0	0	0	0	0	2	0	0
K08350	formate dehydrogenase-N, gamma subunit [EC:1.2.1.2]	12	1	22	3	1	3	0	1	16	0	0	2	0	0	1
K06984	None	0	0	0	0	0	1	0	0	0	0	0	0	2	0	0
K06985	aspartyl protease family protein	971	38	1010	177	1043	259	13	1588	269	4	11	5	9	18	12
K06986	None	38	49	35	23	517	22	7	287	11	150	185	139	279	264	413
K06987	None	670	730	1490	595	2374	1969	200	4820	1136	613	839	1334	626	1096	1152
K02445	MFS transporter, OPA family, glycerol-3-phosphate transporter	73	101	245	411	582	239	25	479	105	59	62	73	79	55	66
K02444	DeoR family transcriptional regulator, glycerol-3-phosphate regulon repressor	325	444	2108	3219	1910	1681	2022	2215	765	3569	4308	1368	3896	4016	719
K00582	tetrahydromethanopterin S-methyltransferase subunit F [EC:2.1.1.86]	0	0	0	0	0	1	0	0	0	0	0	0	2	0	0
K00583	tetrahydromethanopterin S-methyltransferase subunit G [EC:2.1.1.86]	0	0	0	0	0	1	0	0	0	0	0	0	2	0	0
K00580	tetrahydromethanopterin S-methyltransferase subunit D [EC:2.1.1.86]	0	0	0	0	0	1	0	0	0	0	0	0	2	0	0
K02110	F-type H+-transporting ATPase subunit c [EC:3.6.3.14]	9999	10187	15761	13392	11478	15494	9491	12772	11930	9146	12810	9222	13308	11819	9323
K00586	diphthine synthase [EC:2.1.1.98]	0	0	0	0	0	1	0	0	0	0	0	0	2	0	0
K00587	protein-S-isoprenylcysteine O-methyltransferase [EC:2.1.1.100]	2	0	0	0	0	0	0	0	0	0	0	0	0	0	0
K00584	tetrahydromethanopterin S-methyltransferase subunit H [EC:2.1.1.86]	2	6	9	2	2	4	0	13	2	2	3	1	4	0	15
K02441	GlpG protein	118	106	201	47	877	106	4	228	269	64	32	99	28	52	34
K00588	caffeoyl-CoA O-methyltransferase [EC:2.1.1.104]	1085	190	1462	1696	558	684	1066	565	379	1764	2146	830	1929	2071	3114
K02440	glycerol uptake facilitator protein	7087	7229	11895	11405	6238	13037	5298	5060	7403	4778	7386	2008	8901	5937	2783
K00018	glycerate dehydrogenase [EC:1.1.1.29]	2113	2802	2970	1063	5686	2445	3376	4724	4772	2360	3184	6061	2243	3631	3040
K02443	glycerol uptake operon antiterminator	342	489	923	701	420	788	370	2675	437	459	542	1085	430	622	724
K00019	3-hydroxybutyrate dehydrogenase [EC:1.1.1.30]	247	91	243	136	5179	142	2834	1217	3782	73	78	117	202	44	670
K02442	membrane protein GlpM	6	1	4	0	799	3	0	4	34	0	0	0	0	1	23
K08926	light-harvesting complex 1 alpha chain	0	1	8	4	6	4	0	29	5	0	0	0	0	0	1
K08927	light-harvesting complex 1 beta chain	0	1	8	4	6	4	0	29	5	0	0	0	0	0	1
K03149	thiamine biosynthesis ThiG	2205	1452	3478	468	5846	3981	2898	3895	6064	878	2110	1961	1240	1440	4760
K00015	glyoxylate reductase [EC:1.1.1.26]	25	24	197	118	138	151	17	893	115	5	12	9	6	17	517
K01989	putative ABC transport system substrate-binding protein	3405	3135	8393	2587	9696	10417	6521	9571	11149	2148	3425	6342	2350	4400	3629
K00854	xylulokinase [EC:2.7.1.17]	7986	7981	11470	9136	6174	11584	4257	8603	5401	5725	10761	9111	10151	8926	7218
K00855	phosphoribulokinase [EC:2.7.1.19]	1934	26	1486	25	13	200	2	167	341	3	3	5	4	5	3
K00856	adenosine kinase [EC:2.7.1.20]	58	112	55	104	12	23	81	1520	14	113	27	149	51	56	50
K00857	thymidine kinase [EC:2.7.1.21]	2811	2917	4509	3065	1093	4332	978	4880	2532	907	890	4392	1096	2350	4607
K00850	6-phosphofructokinase [EC:2.7.1.11]	8483	8083	13870	7516	4094	13788	2971	16714	6251	9394	12718	22393	9796	15415	14182
K00851	gluconokinase [EC:2.7.1.12]	1828	627	1490	656	1068	1016	104	1898	544	12	17	19	29	31	632
K00852	ribokinase [EC:2.7.1.15]	8329	8084	14701	11283	10900	16557	7339	9244	12710	4722	8569	6567	8921	7697	6132
K00853	L-ribulokinase [EC:2.7.1.16]	44	19	67	424	19	37	18	155	181	13	10	20	29	16	7
K00858	NAD+ kinase [EC:2.7.1.23]	10721	9987	15575	11842	11118	15224	8482	12445	11831	7769	10985	9661	12055	10447	9382
K00859	dephospho-CoA kinase [EC:2.7.1.24]	9765	9859	14870	11848	11115	15146	8488	11986	11752	7761	10980	9670	12032	10452	9389
K01181	endo-1,4-beta-xylanase [EC:3.2.1.8]	682	718	1113	304	345	1765	102	2083	658	1612	1238	4355	1851	2541	1806
K01183	chitinase [EC:3.2.1.14]	153	196	415	77	814	348	22	727	375	602	439	1488	817	759	571
K01182	oligo-1,6-glucosidase [EC:3.2.1.10]	5999	5915	6482	8675	4969	7929	4265	4867	4277	3916	7541	2338	8158	4607	3862
K01185	lysozyme [EC:3.2.1.17]	1251	3300	845	702	466	470	210	6342	346	1162	331	1669	736	731	383
K01184	polygalacturonase [EC:3.2.1.15]	0	0	1	0	1	2	0	8	1	0	0	0	0	0	0
K01187	alpha-glucosidase [EC:3.2.1.20]	9484	8916	10121	9421	5000	9029	4506	8784	5803	7136	8775	9611	10585	8065	8013
K01188	beta-glucosidase [EC:3.2.1.21]	1494	3519	5760	1267	1178	6790	271	5140	2955	2102	1541	4611	2050	3200	1890
K02596	nitrogen fixation protein NifX	8	9	15	7	10	8	1	64	7	21	25	22	34	18	64
K13766	methylglutaconyl-CoA hydratase [EC:4.2.1.18]	225	17	142	86	5130	92	2820	818	3756	10	5	5	294	8	2880
K13767	enoyl-CoA hydratase [EC:4.2.1.17]	16	26	9	4	2	5	1	20	7	32	29	50	49	32	546
K13002	glycosyltransferase [EC:2.4.1.-]	11	56	18	0	0	0	0	167	2	2	2	1	1	3	0
K02984	small subunit ribosomal protein S3Ae	0	0	0	0	0	1	0	0	0	0	0	0	2	0	0
K02986	small subunit ribosomal protein S4	9868	10091	15114	12128	11319	15525	8568	12721	11942	7808	11071	10028	12094	10646	9453
K02987	small subunit ribosomal protein S4e	0	0	0	0	0	1	0	0	0	0	0	0	2	0	0
K02636	cytochrome b6-f complex iron-sulfur subunit [EC:1.10.99.1]	1919	23	1434	5	4	181	0	23	169	4	1	2	2	4	0
K02982	small subunit ribosomal protein S3	9778	9968	14772	11845	11106	14982	8488	12457	11710	7736	10941	9651	12019	10437	9352
K02638	plastocyanin	959	12	720	5	2	93	0	31	85	2	0	1	1	2	0
K02639	ferredoxin	4802	62	3622	46	9	461	6	95	435	9	35	10	21	29	48
K02988	small subunit ribosomal protein S5	9712	9904	14793	11812	11103	15100	8484	12330	11719	7635	10852	9447	11980	10372	9110
K08298	crotonobetainyl-CoA:carnitine CoA-transferase [EC:2.8.3.-]	9	16	29	3	0	20	2	2	8	19	16	27	60	20	27
K08299	carnitinyl-CoA dehydratase [EC:4.2.1.-]	1	1	39	9	8	11	0	64	6	0	0	2	0	1	2
K03583	exodeoxyribonuclease V gamma subunit [EC:3.1.11.5]	294	97	66	106	5056	24	2893	1473	3693	187	117	220	189	185	327
K03582	exodeoxyribonuclease V beta subunit [EC:3.1.11.5]	294	97	67	105	5057	25	2893	1484	3695	188	118	222	189	188	327
K03581	exodeoxyribonuclease V alpha subunit [EC:3.1.11.5]	4739	2914	6431	3559	6723	7299	3833	7648	6932	2318	3687	7649	2680	4768	4716
K03580	ATP-dependent helicase HepA [EC:3.6.4.-];ATP-dependent helicase HepA [EC:3.6.1.-]	253	45	48	10	5054	14	2814	176	3688	77	94	74	144	139	276
K03587	cell division protein FtsI (penicillin-binding protein 3) [EC:2.4.1.129]	6824	8005	9236	7335	9536	9351	6628	8284	8974	3925	5446	1883	7779	4280	4699
K03586	cell division protein FtsL	235	22	53	15	5054	21	2814	119	3692	1	2	3	2	1	72
K03585	membrane fusion protein	1714	3564	908	537	6200	409	3103	9917	4167	2289	705	3180	2079	1500	781
K03584	DNA repair protein RecO (recombination protein O)	9368	9255	13730	10314	10684	14037	7480	10877	11291	5959	8845	8974	10107	8456	9033
K03589	cell division protein FtsQ	8607	9030	12242	9478	10283	12398	7147	8398	10712	5083	8027	5279	9434	6519	8033
K03588	cell division protein FtsW	10788	10935	16357	12570	11879	18113	8783	14685	12627	8473	13254	11108	13059	11851	11734
K01725	cyanate lyase [EC:4.2.1.104]	9	4	31	15	767	15	4	97	45	1	2	3	2	2	3
K01724	4a-hydroxytetrahydrobiopterin dehydratase [EC:4.2.1.96]	1437	105	1076	410	9220	579	5703	1187	7657	30	101	248	49	178	149
K01727	hyaluronate lyase [EC:4.2.2.1]	14	7	19	12	3	6	5	31	7	9	3	15	8	6	2
K01726	None	387	719	514	342	185	329	17	1561	317	320	381	431	365	322	827
K01721	nitrile hydratase [EC:4.2.1.84]	14	6	50	26	66	28	0	176	14	0	2	1	1	3	26
K01720	2-methylcitrate dehydratase [EC:4.2.1.79]	24	8	66	26	814	46	13	88	66	3	4	4	2	6	8
K01729	poly(beta-D-mannuronate) lyase [EC:4.2.2.3]	6	2	4	1	901	4	0	24	37	0	0	1	0	1	0
K01728	pectate lyase [EC:4.2.2.2]	58	70	65	12	45	35	3	185	22	183	180	269	377	198	234
K02188	cobalamin biosynthesis protein CbiD;cobalt-precorrin-5B (C1)-methyltransferase [EC:2.1.1.195]	2783	1997	4006	1411	1581	2884	474	5201	1424	1477	2867	5538	1513	3326	3031
K02189	cobalamin biosynthesis protein CbiG;cobalt-precorrin 5A hydrolase [EC:3.7.1.12]	1790	1941	3275	1432	1631	2771	480	5262	1318	1460	2901	5508	1487	3425	3045
K02182	crotonobetaine/carnitine-CoA ligase [EC:6.2.1.-]	2	2	33	9	8	19	1	60	7	0	1	3	1	5	3
K03769	peptidyl-prolyl cis-trans isomerase C [EC:5.2.1.8]	549	418	722	792	6328	659	3155	5973	4297	850	506	2145	694	1004	681
K03768	peptidyl-prolyl cis-trans isomerase B (cyclophilin B) [EC:5.2.1.8]	6453	6057	12066	4952	7428	11595	4895	10447	9258	5588	6972	10711	6210	8614	7241
K03767	peptidyl-prolyl cis-trans isomerase A (cyclophilin A) [EC:5.2.1.8]	4755	5114	4099	7182	4848	3992	3838	3899	3262	2823	4863	296	6553	2909	4197
K03765	transcriptional activator of cad operon	7	1	1	1	0	0	0	0	0	0	0	0	0	0	0
K03764	transcriptional repressor of met regulon (beta-ribbon, MetJ family)	19	16	22	3	1	3	0	24	161	0	1	2	0	0	2
K03763	DNA polymerase III subunit alpha, Gram-positive type [EC:2.7.7.7]	3411	2989	6597	4917	1801	6397	2138	6525	3103	4310	6264	8727	4890	7074	5646
K03762	MFS transporter, MHS family, proline/betaine transporter	85	33	148	40	951	96	14	180	85	21	20	31	65	24	60
K03761	MFS transporter, MHS family, alpha-ketoglutarate permease	50	27	286	555	1729	184	28	1417	218	5	12	9	21	21	16
K03760	phosphoethanolamine transferase	273	67	168	173	4798	86	2897	1996	3755	114	29	153	53	62	123
K09457	7-cyano-7-deazaguanine reductase [EC:1.7.1.13]	1794	2398	1437	394	233	369	242	4241	312	261	309	433	452	421	872
K09456	putative acyl-CoA dehydrogenase	23	16	169	87	992	96	9	784	111	2	6	4	3	9	8
K09459	phosphonopyruvate decarboxylase [EC:4.1.1.82]	65	134	74	23	11	24	6	632	19	175	215	295	387	209	318
K09458	3-oxoacyl-[acyl-carrier-protein] synthase II [EC:2.3.1.179]	5191	5260	9730	2764	8396	8617	3825	13985	7945	3809	4482	9543	4440	6218	8704
K00602	phosphoribosylaminoimidazolecarboxamide formyltransferase / IMP cyclohydrolase [EC:2.1.2.3 3.5.4.10]	19252	23541	27728	21912	21891	27303	16578	29984	21747	16260	21842	20229	24261	21356	17512
K09981	hypothetical protein	3	5	24	12	9	18	0	132	7	0	2	2	1	4	2
K09980	hypothetical protein	7	1	30	6	905	11	1	37	200	0	1	3	0	1	2
K09983	hypothetical protein	12	5	46	17	1067	21	0	170	237	0	1	1	2	1	1
K09982	hypothetical protein	23	69	150	80	86	73	6	893	69	3	6	2	3	10	5
K09985	hypothetical protein	47	19	191	90	100	97	7	811	78	3	8	4	6	10	7
K09984	hypothetical protein	12	5	43	25	19	21	1	173	15	1	2	1	1	2	5
K09987	hypothetical protein	47	18	191	90	97	97	7	811	78	2	8	4	6	10	7
K09986	hypothetical protein	216	17	156	92	5145	98	2821	817	3763	2	6	2	4	9	75
K09989	hypothetical protein	853	510	1579	618	5235	644	3068	1780	3947	652	599	3126	462	1644	646
K09988	hypothetical protein	359	249	534	130	256	1509	8	1129	386	95	121	169	109	139	90
K12583	phosphatidylinositol alpha 1,6-mannosyltransferase [EC:2.4.1.-]	15	6	33	22	15	42	16	50	29	3	4	1	2	5	5
K12582	TDP-Fuc4NAc transferase [EC:2.4.1.-]	13	1	22	3	1	3	0	1	1	0	0	2	0	0	1
K12589	exosome complex component RRP42	0	0	0	0	0	1	0	0	0	0	0	0	2	0	0
K11720	lipopolysaccharide export system permease protein	281	88	232	197	5156	115	2899	2192	3772	116	31	158	55	64	127
K09759	nondiscriminating aspartyl-tRNA synthetase [EC:6.1.1.23]	268	343	733	414	253	745	89	645	361	396	429	802	397	495	534
K10985	PTS system, galactosamine-specific IIC component	10	5	35	9	0	7	5	9	3	2	2	11	2	3	3
K10984	PTS system, galactosamine-specific IIB component [EC:2.7.1.69]	52	36	393	29	22	783	11	134	269	8	20	42	9	33	24
K07469	aldehyde dehydrogenase (FAD-independent) [EC:1.2.99.7]	7	18	42	7	4	87	0	23	28	7	7	11	2	11	3
K07464	putative RecB family exonuclease	1089	2264	4683	1064	842	6179	213	5039	2512	1128	1183	2742	1333	2153	1977
K07465	putative RecB family exonuclease	1925	25	1452	16	7	203	8	52	180	3	2	3	2	5	1
K07466	replication factor A1	5	3	3	1	1	2	2	2	2	8	6	32	17	4	18
K07467	phage replication initiation protein	752	715	2638	3252	1201	3678	2038	2026	1254	3928	5953	1948	4546	4587	1868
K07460	putative endonuclease	8234	9221	12010	8498	9915	11878	7023	9986	10141	5733	8634	8627	9745	8255	7831
K07461	putative endonuclease	2985	2157	5235	4073	2192	5431	1580	5203	2779	3151	4871	5813	3923	4977	3826
K07462	single-stranded-DNA-specific exonuclease [EC:3.1.-.-]	6285	5454	11716	4849	7196	11321	4805	10996	8979	5092	6167	9551	5657	7625	8136
K07463	archaea-specific RecJ-like exonuclease	5	3	3	1	2	4	2	2	2	9	6	32	20	4	20
K10679	nitroreductase / dihydropteridine reductase [EC:1.-.-.- 1.5.1.34]	183	173	78	277	429	13	248	3827	340	347	71	456	444	172	3027
K10678	nitroreductase [EC:1.-.-.-]	220	4	35	11	3853	16	2803	21	3482	2	1	4	1	1	20
K10670	glycine reductase [EC:1.21.4.2]	543	842	1410	1388	924	1167	674	1680	741	816	2407	2546	1067	1985	2013
K10673	streptomycin 3"-kinase [EC:2.7.1.87]	1	10	111	68	74	64	4	636	58	1	3	1	2	6	4
K10672	betaine reductase [EC:1.21.4.4]	97	257	323	281	231	393	74	655	217	128	191	433	128	279	171
K10674	ectoine hydroxylase [EC:1.14.11.-]	1	1	9	4	105	7	3	24	7	0	1	0	0	0	0
K10677	inulin fructotransferase (DFA-I-forming) [EC:4.2.2.17]	8	2	2	1	2	2	0	5	1	0	2	1	0	2	0
K10676	2,4-dichlorophenol 6-monooxygenase [EC:1.14.13.20]	1	2	23	11	15	17	0	117	13	1	1	1	0	1	1
K08724	penicillin-binding protein 2B	1342	581	2529	3175	828	3010	1355	883	1507	1779	2199	663	2043	2046	1336
K08722	5'-nucleotidase [EC:3.1.3.5]	835	1540	5152	630	567	5060	266	2922	2580	1069	916	4355	913	2717	964
K08723	5'-nucleotidase [EC:3.1.3.5]	11	1	22	1	1	3	0	0	1	0	0	2	0	0	1
K08720	outer membrane protein OmpU	0	0	1	0	0	1	1	3	0	0	0	0	0	0	0
K08721	multidrug resistance outer membrane protein OprJ	2	0	2	1	294	1	0	6	2	0	0	0	0	0	0
K08728	nucleoside deoxyribosyltransferase [EC:2.4.2.6]	1222	324	1530	1780	227	1989	124	99	1104	28	61	44	139	25	434
K00119	None	11	17	182	104	794	100	7	924	115	2	6	2	4	10	8
K00118	glucose-fructose oxidoreductase [EC:1.1.99.28]	11	7	40	25	16	36	9	131	20	3	5	4	6	11	3
K00449	protocatechuate 3,4-dioxygenase, beta subunit [EC:1.13.11.3]	25	19	170	96	996	106	16	782	128	4	7	3	4	11	30
K00448	protocatechuate 3,4-dioxygenase, alpha subunit [EC:1.13.11.3]	27	19	167	96	1148	106	16	773	157	4	7	3	4	11	29
K00446	catechol 2,3-dioxygenase [EC:1.13.11.2]	5	4	37	17	15	18	1	209	20	1	1	0	3	3	1
K00117	quinoprotein glucose dehydrogenase [EC:1.1.5.2]	136	22	191	106	4507	116	1323	972	3258	6	9	9	13	25	74
K00116	malate dehydrogenase (quinone) [EC:1.1.5.4]	1011	26	819	47	1788	161	19	209	199	8	7	9	8	17	537
K00111	glycerol-3-phosphate dehydrogenase [EC:1.1.5.3]	3565	4769	9657	3520	6659	8229	3159	12757	7405	4562	5517	8655	4334	7001	3997
K00442	coenzyme F420 hydrogenase delta subunit	0	0	0	0	0	1	0	0	0	0	0	0	2	0	0
K00113	glycerol-3-phosphate dehydrogenase subunit C [EC:1.1.5.3]	479	1562	215	6	9	77	1	1862	54	3	5	4	3	10	4
K00112	glycerol-3-phosphate dehydrogenase subunit B [EC:1.1.5.3]	479	1562	215	5	9	77	1	1860	54	3	5	5	3	11	4
K01531	Mg2+-importing ATPase [EC:3.6.3.2]	2271	2255	7570	1890	1984	8120	459	5317	3953	903	886	3582	729	2399	1189
K04720	threonine-phosphate decarboxylase [EC:4.1.1.81]	2237	2237	3634	1742	1126	4337	552	4833	1677	1737	3285	6295	1860	3872	3493
K01533	Cu2+-exporting ATPase [EC:3.6.3.4]	12016	9984	16435	12170	20602	15177	14391	13834	19080	7820	11087	9747	12414	10549	13034
K01534	Cd2+/Zn2+-exporting ATPase [EC:3.6.3.3 3.6.3.5]	8146	10984	20350	8248	10225	21694	7108	24561	13005	10152	14125	21637	11163	16788	19432
K01535	H+-transporting ATPase [EC:3.6.3.6]	2	5	11	3	2	5	0	16	2	0	0	0	0	0	1
K01537	Ca2+-transporting ATPase [EC:3.6.3.8]	6919	5439	12759	3814	2057	12159	1374	9130	5743	4129	4796	13119	3955	7811	5589
K14605	lycopene cyclase CruA	959	11	717	2	0	90	0	10	84	2	0	1	1	2	0
K14606	lycopene cyclase CruP	959	11	717	2	0	90	0	10	84	2	0	1	1	2	0
K00413	ubiquinol-cytochrome c reductase cytochrome c1 subunit [EC:1.10.2.2];ubiquinol-cytochrome c reductase cytochrome c1 subunit	262	23	215	97	5147	113	2820	899	3767	4	8	6	8	13	54
K10120	putative sugar transport system substrate-binding protein	1166	333	1480	961	191	1988	85	80	1077	30	70	42	111	35	432
K05600	anthranilate 1,2-dioxygenase (deaminating, decarboxylating) small subunit [EC:1.14.12.1]	5	1	4	0	586	2	0	2	34	0	0	0	0	1	23
K05777	putative thiamine transport system substrate-binding protein	49	75	155	268	205	348	68	157	169	44	129	290	56	205	145
K03972	phage shock protein E	8	5	34	10	4	12	0	75	148	0	0	3	0	0	2792
K03973	phage shock protein C	136	165	391	877	332	494	285	356	429	81	124	408	82	200	74
K03970	phage shock protein B	14	3	29	12	7	12	0	40	166	0	1	2	0	2	2
K03971	phage shock protein D	11	1	22	3	1	3	0	0	1	0	0	2	0	0	1
K03976	putative transcription regulator	3291	3199	9517	4144	2535	10551	1631	6110	4807	4861	5967	8982	5159	7257	5058
K03977	GTP-binding protein	9786	10066	14949	12005	11178	15130	8682	12603	11761	7785	11018	9724	12067	10498	9409
K03974	psp operon transcriptional activator	14	3	31	10	7	11	0	36	165	0	1	2	1	1	1
K03975	membrane-associated protein	6135	6204	9658	8972	5741	11166	3936	4861	6263	4123	5487	2733	7598	4554	5609
K03978	GTP-binding protein	4336	5397	10246	4844	7189	11113	4802	10902	8787	5005	6090	9413	5444	7570	8112
K03979	GTP-binding protein	9791	10042	14970	12020	11209	15163	8682	12570	11777	7710	10951	9609	11871	10463	9402
K13378	NADH dehydrogenase I subunit C/D [EC:1.6.5.3];NADH-quinone oxidoreductase subunit C/D [EC:1.6.5.3]	825	1628	229	15	5059	99	2834	1621	3581	900	221	1283	546	564	206
K02372	3R-hydroxymyristoyl ACP dehydrase [EC:4.2.1.-]	3981	3388	8755	2890	6658	8904	3722	8747	7636	2480	3858	7676	3259	5182	5092
K02371	enoyl-[acyl carrier protein] reductase II [EC:1.3.1.-]	1965	2701	7108	2123	1397	7771	801	5424	3403	2505	3428	7077	2602	4661	6537
K02377	GDP-L-fucose synthase [EC:1.1.1.271]	1699	1911	1417	125	170	618	39	3075	369	1086	456	1594	923	756	406
K02379	FdhD protein	566	733	542	537	5302	613	2978	3409	4154	170	130	477	153	266	676
K03396	S-(hydroxymethyl)glutathione synthase [EC:4.4.1.22]	0	1	12	4	5	4	1	37	3	0	1	0	0	0	0
K03394	precorrin-2 C20-methyltransferase / cobalt-factor-2 C20-methyltransferase [EC:2.1.1.130 2.1.1.151];precorrin-2/cobalt-factor-2 C20-methyltransferase [EC:2.1.1.130 2.1.1.151]	4446	3055	5490	2326	2968	4634	597	8292	2117	2097	3510	7528	2308	4507	4243
K03395	gentamicin 3'-N-acetyltransferase [EC:2.3.1.60]	0	0	2	0	1	1	0	2	0	0	0	0	0	0	0
K03392	aminocarboxymuconate-semialdehyde decarboxylase [EC:4.1.1.45]	1	2	11	8	8	16	0	53	8	1	1	0	1	2	7
K03390	heterodisulfide reductase subunit C [EC:1.8.98.1]	164	220	79	9	10	93	20	363	38	945	288	1323	710	540	181
K03391	pentachlorophenol monooxygenase [EC:1.14.13.50]	1	1	2	1	2	3	0	4	2	0	0	0	0	0	0
K03399	precorrin-6Y C5,15-methyltransferase [EC:2.1.1.132]	257	296	473	372	227	492	122	749	263	153	153	1077	79	461	168
K12136	hydrogenase-4 component A [EC:1.-.-.-]	1	0	1	0	0	0	0	0	0	0	0	0	0	0	0
K12137	hydrogenase-4 component B [EC:1.-.-.-]	11	58	19	2	3	0	0	168	2	3	5	1	4	4	14
K06610	MFS transporter, SP family, inositol transporter	590	247	1115	901	187	1300	80	67	839	21	57	27	106	18	421
K12138	hydrogenase-4 component C [EC:1.-.-.-]	1	0	0	0	0	0	0	0	0	0	0	0	0	0	0
K12139	hydrogenase-4 component D [EC:1.-.-.-]	0	1	0	0	3	0	0	0	0	1	0	0	0	0	0
K11444	two-component system, chemotaxis family, response regulator WspR [EC:2.7.7.65]	6	2	9	4	801	5	0	30	34	0	0	0	0	1	1
K11440	choline dehydrogenase [EC:1.1.1.1]	9	22	50	13	1	9	3	20	4	4	7	23	7	6	3
K11443	two-component system, cell cycle response regulator DivK	5	16	158	99	146	96	6	840	82	2	6	2	3	9	7
K11442	putative uridylyltransferase [EC:2.7.7.-]	0	0	2	1	0	1	0	2	1	0	0	0	0	0	0
K00612	carbamoyltransferase [EC:2.1.3.-]	43	47	64	26	1140	50	4	221	65	26	38	45	50	49	20
K00613	glycine amidinotransferase [EC:2.1.4.1]	10	17	12	3	4	17	2	15	10	17	13	25	60	16	25
K00610	aspartate carbamoyltransferase regulatory subunit	6436	7248	6748	7932	4428	6229	4038	5774	3886	4973	7848	6102	8565	6296	3892
K00611	ornithine carbamoyltransferase [EC:2.1.3.3]	9831	8381	16311	11798	7642	16399	5036	10943	9202	5606	9064	10589	9525	9403	7018
K00616	transaldolase [EC:2.2.1.2]	8101	7705	15377	8809	10828	16624	7027	6945	12009	3804	7749	3270	8217	6113	7374
K00614	None	4	1	12	14	4	4	21	31	4	21	5	1	97	3	46
K00615	transketolase [EC:2.2.1.1]	14104	17318	32964	21027	15359	32457	13321	28428	19913	18850	26401	23697	24715	26665	20933
K00619	amino-acid N-acetyltransferase [EC:2.3.1.1]	247	187	98	24	4267	44	2811	847	3708	9	13	5	12	13	42
K10240	cellobiose transport system substrate-binding protein	6	4	27	5	7	45	0	28	22	1	0	0	0	0	71
K10241	cellobiose transport system permease protein	6	4	27	5	7	45	0	29	22	1	0	0	0	0	68
K10242	cellobiose transport system permease protein	4144	4080	1963	6801	3441	1282	3629	577	913	2679	4782	135	6396	2751	1247
K10243	cellobiose transport system ATP-binding protein	4473	4555	3932	7001	3928	3934	3675	1575	2873	2684	4827	138	6400	2847	1258
K04110	benzoate-CoA ligase [EC:6.2.1.25]	1	1	7	2	2	2	0	18	2	0	0	0	0	0	1
K04117	cyclohexanecarboxyl-CoA dehydrogenase [EC:1.3.99.-]	0	0	0	0	1	3	0	3	1	0	0	0	0	0	0
K04116	cyclohexanecarboxylate-CoA ligase [EC:6.2.1.-]	0	0	1	0	2	3	0	3	1	0	0	0	0	0	0
K05517	nucleoside-specific channel-forming protein	18	2	25	3	800	5	0	5	195	0	0	3	0	1	1
K07705	two-component system, LytT family, response regulator LytT	18	13	35	24	40	48	56	70	30	11	5	8	7	6	84
K07704	two-component system, LytT family, sensor histidine kinase LytS [EC:2.7.13.3]	173	1011	3959	64	456	5102	72	1147	2149	41	135	42	78	577	589
K07707	two-component system, AgrA family, response regulator AgrA	1198	212	1011	163	46	1578	39	198	589	89	93	117	184	79	153
K07706	two-component system, AgrA family, sensor histidine kinase AgrC [EC:2.7.13.-]	652	191	689	95	47	988	33	446	397	484	293	1258	592	605	406
K07701	two-component system, CitB family, sensor histidine kinase DcuS [EC:2.7.13.3]	11	1	22	2	1	3	0	1	1	0	0	2	0	0	1
K07700	two-component system, CitB family, cit operon sensor histidine kinase CitA [EC:2.7.13.3]	17	2	22	3	1	3	0	1	1	0	0	2	0	0	1
K07703	two-component system, CitB family, response regulator DcuR	17	2	22	2	1	3	0	2	3	0	0	2	0	0	1
K07702	two-component system, CitB family, response regulator CitB	17	2	22	3	1	3	0	1	1	0	0	2	0	0	1
K07709	two-component system, NtrC family, sensor histidine kinase HydH [EC:2.7.13.3]	27	115	62	1	4	4	0	339	6	4	4	4	2	6	2
K07708	two-component system, NtrC family, nitrogen regulation sensor histidine kinase GlnL [EC:2.7.13.3]	275	69	201	195	5150	107	2899	2125	3768	114	29	153	53	61	125
K01955	carbamoyl-phosphate synthase large subunit [EC:6.3.5.5]	11247	12108	23497	14026	12320	26086	9421	15573	16171	10196	14242	11532	14929	14348	8531
K13042	dimethylglycine N-methyltransferase [EC:2.1.1.161]	1	0	0	0	0	0	0	0	0	0	0	0	0	0	0
K09934	hypothetical protein	4	0	23	0	463	5	0	3	32	0	0	3	0	0	1
K09935	hypothetical protein	1219	369	1765	1507	689	670	1007	967	386	2000	2327	940	2231	2209	724
K06216	putative ribose uptake protein	587	243	1054	902	182	1228	82	58	799	21	57	27	106	18	420
K09937	hypothetical protein	70	121	178	171	85	78	83	2148	232	114	29	152	53	62	54
K13745	L-2,4-diaminobutyrate decarboxylase [EC:4.1.1.86]	29	16	26	13	305	25	24	42	31	68	68	112	195	29	69
K13747	carboxynorspermidine decarboxylase [EC:4.1.1.-]	2082	2782	2456	1135	5474	2148	3184	5684	4490	2490	1737	6810	2132	3732	2648
K06211	HipB family transcriptional regulator, involved in the regulation of NAD biosynthesis	252	104	258	183	4254	216	3009	180	3718	54	81	89	55	71	116
K06212	formate transporter	28	34	31	14	9	21	3	9	170	41	45	85	87	64	38
K09933	hypothetical protein	228	4	45	13	4756	18	2803	74	3679	9	1	5	292	1	36
K02618	phenylacetic acid degradation protein	25	6	31	17	553	27	9	74	57	2	4	1	2	4	26
K02619	4-amino-4-deoxychorismate lyase [EC:4.1.3.38]	665	1058	405	135	5172	230	2869	1814	3850	925	273	1390	597	634	3484
K02968	small subunit ribosomal protein S20	9739	9988	14878	11799	11120	15145	8486	12492	11755	7619	10835	9458	11929	10389	9069
K02966	small subunit ribosomal protein S19e	0	0	0	0	0	1	0	0	0	0	0	0	2	0	0
K02967	small subunit ribosomal protein S2	9769	9977	14860	11839	11119	15134	8484	12452	11747	7772	10987	9686	12062	10458	9384
K02616	phenylacetic acid degradation operon negative regulatory protein	20	4	30	15	558	19	1	113	48	1	1	1	1	2	28
K02965	small subunit ribosomal protein S19	9782	9983	14877	11849	11119	15146	8487	12506	11758	7709	10930	9591	11871	10443	9389
K02962	small subunit ribosomal protein S17e	0	0	0	0	0	1	0	0	0	0	0	0	2	0	0
K02611	phenylacetic acid degradation protein	26	9	49	26	561	38	9	146	63	2	4	1	3	4	31
K02613	phenylacetic acid degradation NADH oxidoreductase	32	10	57	33	565	46	10	192	64	10	5	5	292	4	42
K03569	rod shape-determining protein MreB and related proteins	9277	7945	16298	7912	8255	15655	6072	15475	11142	7031	9437	16385	7655	11607	12291
K03568	TldD protein	2245	475	2971	2056	1693	1745	1296	2071	1094	1979	2472	1206	2318	2505	903
K03565	regulatory protein	8601	9671	13003	10131	10509	13937	7472	10710	11190	5934	8753	8963	9973	8290	8834
K06218	RelE protein	162	276	886	1770	1234	673	1089	1589	423	1839	2220	948	2128	2108	375
K03567	glycine cleavage system transcriptional repressor	74	110	55	95	903	9	78	1440	201	113	25	151	50	56	50
K03566	LysR family transcriptional regulator, glycine cleavage system transcriptional activator	76	68	656	381	3401	372	26	3323	640	6	21	11	13	33	28
K03561	biopolymer transport protein ExbB	5056	4328	3107	425	12454	686	5845	9786	8059	2408	947	3310	2521	1771	6887
K03560	biopolymer transport protein TolR	281	72	62	106	5406	23	2892	1378	3726	113	24	151	51	53	120
K03563	carbon storage regulator	1238	1055	2540	1112	6564	1486	3229	3143	4617	1541	1505	5468	1405	3052	2604
K03562	biopolymer transport protein TolQ	372	237	339	234	5518	131	2906	2696	3821	195	160	232	214	219	382
K01709	CDP-glucose 4,6-dehydratase [EC:4.2.1.45]	90	199	251	36	782	111	13	781	125	249	321	412	372	235	448
K01708	galactarate dehydratase [EC:4.2.1.42]	25	32	151	76	633	79	6	859	74	8	6	9	9	10	30
K01707	5-dehydro-4-deoxyglucarate dehydratase [EC:4.2.1.41]	6	6	44	19	570	26	3	164	22	2	1	1	0	3	25
K01706	glucarate dehydratase [EC:4.2.1.40]	35	40	171	23	926	74	2	346	96	86	115	75	96	102	159
K01704	3-isopropylmalate/(R)-2-methylmalate dehydratase small subunit [EC:4.2.1.33 4.2.1.35]	15601	14474	16504	17737	20137	14126	14258	19460	16023	12025	17592	17419	20031	15824	11649
K01703	3-isopropylmalate/(R)-2-methylmalate dehydratase large subunit [EC:4.2.1.33 4.2.1.35]	15619	14509	16505	17739	20138	14127	14259	19717	16029	12142	17731	17725	20140	15924	11955
K14165	dual specificity phosphatase [EC:3.1.3.16 3.1.3.48]	6	0	3	1	298	3	12	21	13	0	1	0	0	0	28
K14164	glycyl-tRNA synthetase [EC:6.1.1.14]	0	0	1	0	1	2	0	0	0	0	0	0	0	0	0
K14166	copper transport protein	0	2	16	6	7	7	0	55	4	0	0	0	0	1	4
K14161	protein ImuB	27	33	326	195	1096	197	20	1690	200	7	12	7	13	24	14
K14160	protein ImuA	50	81	308	280	190	181	90	2909	154	115	33	152	55	67	60
K14162	error-prone DNA polymerase [EC:2.7.7.7]	33	37	347	209	1106	225	28	1715	219	8	16	8	14	29	16
K05396	D-cysteine desulfhydrase [EC:4.4.1.15]	368	788	470	565	1502	441	355	2652	302	296	328	553	309	463	502
K03709	DtxR family transcriptional regulator, Mn-dependent transcriptional regulator	120	101	223	500	90	215	140	472	148	145	130	131	598	177	3122
K03708	transcriptional regulator CtsR	493	811	563	585	93	309	155	1907	209	568	300	1926	609	858	978
K08160	MFS transporter, DHA1 family, multidrug/chloramphenicol efflux transport protein	12	1	25	5	214	4	0	13	1	0	0	2	0	0	24
K03701	excinuclease ABC subunit A	16289	16835	20761	20250	16174	21295	12439	19055	15861	11846	16413	11799	19824	14320	14514
K03700	recombination protein U	2073	1167	3767	3603	1201	4795	1478	2107	2116	2565	4459	2086	3224	3392	3395
K03703	excinuclease ABC subunit C	9817	10031	14919	12099	11304	15331	8558	12563	11874	7664	10881	9740	11961	10530	9109
K03702	excinuclease ABC subunit B	9790	9997	14907	11851	11121	15153	8488	12530	11760	7778	10995	9707	12066	10470	9407
K03705	heat-inducible transcriptional repressor	8649	7180	10647	11699	5638	9978	5557	8159	5879	6564	10435	7999	10770	9088	6053
K03704	cold shock protein (beta-ribbon, CspA family)	13482	13166	19480	19900	28113	20150	18016	15526	22556	10056	15841	10434	18175	13687	9748
K03707	transcriptional activator TenA [EC:3.5.99.2];thiaminase (transcriptional activator TenA) [EC:3.5.99.2]	5208	5112	5643	8225	4260	4598	4033	5632	3397	3415	5413	3441	6869	4549	1959
K03706	transcriptional pleiotropic repressor	911	867	1595	724	593	2227	294	1951	840	854	2288	2303	1145	1652	2604
K06283	putative DeoR family transcriptional regulator, stage III sporulation protein D	1101	1088	2561	1083	465	1095	600	2667	789	1676	2914	6169	1794	3664	3144
K06282	hydrogenase small subunit [EC:1.12.99.6]	100	253	140	106	15	41	84	2037	30	138	49	197	120	87	108
K06281	hydrogenase large subunit [EC:1.12.99.6]	99	253	140	106	14	39	84	2035	30	138	49	197	126	87	107
K06287	septum formation protein	8629	9705	13539	10646	10986	13252	8393	14436	10731	7749	10868	9661	11662	10451	8868
K06286	septation ring formation regulator	1198	321	1521	1392	228	1983	180	96	1097	46	63	35	220	24	1004
K06285	transcription attenuation protein (tryptophan RNA-binding attenuator protein)	32	59	75	5	22	85	3	263	60	398	205	1146	418	532	778
K06284	transcriptional pleiotropic regulator of transition state genes	932	996	2200	1053	454	1110	422	2838	772	1512	1538	5709	1467	3133	2593
K08161	MFS transporter, DHA1 family, multidrug resistance protein	2376	646	3014	2337	422	3923	187	210	2175	45	116	66	230	46	860
K06438	similar to stage IV sporulation protein	1520	1252	2790	1042	537	2228	407	3100	1030	1810	2966	6351	1871	3650	3313
K06867	None	120	115	244	212	2016	154	111	2201	205	259	167	389	451	135	1024
K06866	autonomous glycyl radical cofactor	14	1	22	3	1	3	0	1	1	0	0	2	0	0	1
K06865	ATPase	0	0	0	0	0	1	0	0	0	0	0	0	2	0	0
K06864	None	2517	1740	3332	1459	618	2318	376	5850	1049	1557	2576	5108	1568	2927	2357
K06863	5-formaminoimidazole-4-carboxamide-1-(beta)-D-ribofuranosyl 5'-monophosphate synthetase [EC:6.3.4.-]	0	0	0	0	0	1	0	0	0	0	0	0	2	0	0
K06862	energy-converting hydrogenase B subunit Q	0	0	1	0	0	1	0	0	0	0	0	0	2	0	0
K06861	lipopolysaccharide export system ATP-binding protein [EC:3.6.3.-]	2138	2397	1302	284	5191	339	2930	5471	3961	1215	493	1716	1321	868	3380
K06860	None	968	16	747	24	12	124	8	116	101	3	2	2	2	4	2
K12659	N-acetyl-gamma-glutamyl-phosphate reductase / acetylglutamate kinase [EC:1.2.1.38 2.7.2.8]	0	0	0	0	0	0	0	1	0	0	0	0	0	0	0
K12658	4-hydroxyproline epimerase [EC:5.1.1.8]	15	13	117	76	879	73	6	676	96	3	5	3	7	16	5
K15023	5-methyltetrahydrofolate corrinoid/iron sulfur protein methyltransferase	0	1	0	0	3	0	0	0	0	1	0	0	0	0	0
K15022	formate dehydrogenase beta subunit [EC:1.2.1.43]	44	52	8	91	1	1	78	1259	1	112	23	148	48	52	48
K15024	propanediol utilization protein	1156	952	2330	1146	761	2446	340	2573	998	1110	2535	4214	1170	2537	3213
K08700	carbon dioxide concentrating mechanism protein CcmO	959	11	717	2	0	90	0	10	84	2	0	1	1	2	0
K08162	MFS transporter, DHA1 family, multidrug resistance protein	25	31	157	8	16	174	0	78	51	41	54	58	47	33	55
K00137	aminobutyraldehyde dehydrogenase [EC:1.2.1.19]	15	11	138	74	626	68	4	669	62	1	3	3	2	7	6
K00135	succinate-semialdehyde dehydrogenase (NADP+) [EC:1.2.1.16]	2490	499	3000	1805	6149	2560	3008	3232	5239	76	138	96	552	96	3516
K00134	glyceraldehyde 3-phosphate dehydrogenase [EC:1.2.1.12]	10068	10078	15030	11891	16261	15215	11324	12799	15807	7811	11037	9781	12401	10522	10084
K00133	aspartate-semialdehyde dehydrogenase [EC:1.2.1.11]	9061	8781	9945	10896	11355	8865	8390	11430	8872	7675	10759	9535	11755	9870	8923
K00132	acetaldehyde dehydrogenase (acetylating) [EC:1.2.1.10]	0	2	3	2	0	1	0	21	0	3	4	2	6	3	14
K00131	glyceraldehyde-3-phosphate dehydrogenase (NADP) [EC:1.2.1.9]	54	39	89	45	1063	32	35	106	86	47	42	67	136	42	178
K00130	betaine-aldehyde dehydrogenase [EC:1.2.1.8]	1258	101	1240	218	6760	515	2848	1699	3929	72	101	105	93	92	652
K00138	aldehyde dehydrogenase [EC:1.2.1.-]	5	0	22	3	1	3	0	0	0	0	0	2	0	0	1
K00429	catalase [EC:1.11.1.6]	7	4	23	10	809	12	1	87	202	1	1	1	1	2	69
K00428	cytochrome c peroxidase [EC:1.11.1.5]	272	316	215	178	887	89	108	2132	280	1064	368	1436	1292	716	468
K00421	None	0	1	0	0	3	0	0	0	0	1	0	0	0	0	0
K00423	L-ascorbate oxidase [EC:1.10.3.3]	0	0	4	0	2	2	0	18	3	0	0	0	0	0	0
K00425	cytochrome d ubiquinol oxidase subunit I [EC:1.10.3.-];cytochrome bd-I oxidase subunit I [EC:1.10.3.-]	3141	2219	2792	1646	6183	2359	3039	4569	5262	1101	402	1583	1156	731	4598
K00427	L-lactate permease	11	1	23	3	2	4	0	11	1	0	0	2	0	0	24
K00426	cytochrome d ubiquinol oxidase subunit II [EC:1.10.3.-];cytochrome bd-I oxidase subunit II [EC:1.10.3.-]	3134	2217	2785	1645	6183	2357	3037	4569	5260	1093	395	1551	1141	727	1792
K14375	dTDP-L-oleandrosyltransferase [EC:2.4.1.-]	0	0	0	0	0	1	0	0	0	0	0	0	0	0	0
K09845	methoxyneurosporene dehydrogenase [EC:1.14.99.-]	0	1	8	4	6	4	0	29	5	0	0	0	0	0	1
K14083	trimethylamine methyltransferase [EC:2.1.1.-]	46	62	169	49	32	59	8	290	30	18	49	154	35	47	141
K14081	methanol corrinoid protein	0	0	0	0	0	0	0	1	0	0	0	0	0	0	0
K14086	ech hydrogenase subunit A	20	30	166	8	15	196	0	75	67	43	56	61	49	40	57
K14087	ech hydrogenase subunit B	38	103	192	8	16	211	2	244	78	61	71	87	110	60	82
K14084	trimethylamine corrinoid protein	8	8	12	7	5	6	1	29	4	22	47	84	50	30	91
K14088	ech hydrogenase subunit C	38	103	192	8	16	211	2	244	78	61	71	87	110	60	82
K14089	ech hydrogenase subunit D	33	94	195	8	19	208	0	288	81	44	58	62	50	44	58
K01552	None	13056	10552	13227	16849	10736	14483	7742	7811	9017	6177	11813	1683	14035	6764	5286
K01551	arsenite-transporting ATPase [EC:3.6.3.16]	2407	638	1711	83	3886	310	2821	1226	3734	455	289	1337	507	596	980
K01556	kynureninase [EC:3.7.1.3]	11	7	42	25	606	32	2	175	51	3	5	1	1	5	509
K01557	acylpyruvate hydrolase [EC:3.7.1.5]	0	1	13	6	6	7	0	49	6	1	0	0	0	0	1
K01554	None	39	26	90	14	953	34	5	87	54	5	11	24	3	14	20
K01555	fumarylacetoacetase [EC:3.7.1.2]	216	6	36	15	4961	29	2815	126	3534	1	2	1	3	2	70
K04708	3-dehydrosphinganine reductase [EC:1.1.1.102]	1	0	0	0	0	0	0	0	0	0	0	0	0	0	0
K13688	cyclic beta-1,2-glucan synthetase [EC:2.4.1.-]	9	21	128	77	85	73	6	706	67	22	32	25	43	32	70
K13683	putative colanic acid biosynthesis glycosyltransferase [EC:2.4.-.-]	5	0	21	1	1	3	0	0	0	0	0	2	0	0	1
K13685	UDP-N-acetylglucosamine:undecaprenyl-P N-acetylglucosaminyl 1-P transferase [EC:2.7.8.-]	3296	2635	8436	3309	1336	8185	1477	4910	3998	2878	3126	5329	2955	4878	2208
K13684	putative colanic acid biosynthesis glycosyltransferase [EC:2.4.-.-]	5	0	21	1	1	3	0	0	0	0	0	2	0	0	1
K13687	arabinofuranosyltrasnferase [EC:2.4.2.-];arabinofuranosyltransferase [EC:2.4.2.-]	7	2	11	7	2	13	7	14	6	0	1	0	0	1	1
K13686	arabinofuranosyltransferase [EC:2.4.2.-]	7	2	12	9	3	16	10	8	8	1	2	0	0	2	1
K14159	ribonuclease HI / DNA polymerase III subunit epsilon [EC:3.1.26.4 2.7.7.7]	213	3	12	4	4447	10	2826	39	3504	1	1	0	0	1	119
K02399	flagella synthesis protein FlgN	15	2	37	11	905	10	0	40	198	0	0	3	0	1	2
K02398	negative regulator of flagellin synthesis FlgM	286	347	578	396	1157	552	89	1002	506	654	440	1738	787	810	1071
K02395	flagellar protein FlgJ	305	343	504	365	1141	584	76	751	527	620	425	1680	685	830	499
K02394	flagellar P-ring protein precursor FlgI	49	144	269	139	1022	116	14	1466	298	7	45	14	23	36	62
K02397	flagellar hook-associated protein 3 FlgL	315	398	859	494	1270	814	151	1876	633	705	529	1825	855	871	1282
K02396	flagellar hook-associated protein 1 FlgK	622	755	1625	794	1404	1261	244	2601	903	1147	1097	2784	1335	1604	2052
K02391	flagellar basal-body rod protein FlgF	19	17	194	105	1003	104	8	880	279	2	7	5	5	9	9
K02390	flagellar hook protein FlgE	385	609	1217	539	1315	1078	155	2642	775	939	869	2224	1113	1114	1815
K02393	flagellar L-ring protein precursor FlgH	41	138	237	111	1016	111	8	1442	288	6	13	8	7	18	13
K02392	flagellar basal-body rod protein FlgG	1571	1686	3716	1542	1683	2112	571	5614	1500	2387	3593	7497	2754	4299	4855
K13533	two-component system, sporulation sensor kinase E [EC:2.7.13.3]	0	0	1	0	0	0	0	0	0	0	0	0	0	0	0
K13532	two-component system, sporulation sensor kinase D [EC:2.7.13.3]	0	0	1	0	0	0	0	0	0	0	0	0	0	0	3
K13531	methylated-DNA-[protein]-cysteine S-methyltransferase [EC:2.1.1.63]	571	77	386	65	11	679	60	78	249	0	1	2	1	3	1011
K13530	AraC family transcriptional regulator, regulatory protein of adaptative response / methylphosphotriester-DNA alkyltransferase methyltransferase [EC:2.1.1.-]	10	5	15	10	1	4	6	10	3	2	2	9	2	3	505
K14054	protein MpaA	26	29	13	8	3	2	0	131	2	92	116	89	172	147	270
K02601	transcriptional antiterminator NusG	10040	10455	16129	13753	11882	16184	9512	14392	12219	10311	13814	12065	15321	13480	10339
K02970	small subunit ribosomal protein S21	5902	3957	7674	4764	6711	6214	4787	9124	6830	5065	6036	9530	5596	7051	8083
K05378	phycoerythrin-associated linker protein	1	0	0	0	0	0	0	0	0	0	0	0	0	0	0
K12339	cysteine synthase B [EC:2.5.1.47]	281	67	82	117	5066	40	2892	1440	3698	114	25	151	50	54	121
K14060	putative DNA-invertase from lambdoid prophage Rac	5	9	107	71	482	66	5	640	61	1	4	1	2	8	4
K11686	chromosome-anchoring protein RacA	0	0	1	1	0	0	0	0	0	0	0	0	0	0	7
K11685	DNA-binding protein StpA	11	1	21	1	1	3	0	0	0	0	0	2	0	0	1
K11689	C4-dicarboxylate transporter, DctQ subunit	20	45	127	5	720	55	3	111	246	88	120	76	113	90	640
K11688	C4-dicarboxylate-binding protein DctP	655	563	1584	597	865	506	257	1797	608	685	653	3148	487	1704	2016
K08939	light-harvesting protein B-800-850 beta chain	0	0	0	0	2	0	0	0	0	0	0	0	0	0	0
K03048	DNA-directed RNA polymerase subunit delta [EC:2.7.7.6];DNA-directed RNA polymerase subunit delta	1322	551	2157	3015	725	2237	1182	1051	1236	1792	2169	656	2139	2003	1325
K03049	DNA-directed RNA polymerase subunit E' [EC:2.7.7.6]	0	0	0	0	0	1	0	0	0	0	0	0	2	0	0
K13821	proline dehydrogenase / delta 1-pyrroline-5-carboxylate dehydrogenase [EC:1.5.99.8 1.5.1.12]	2427	90	1871	248	10297	463	5670	1906	7762	23	28	22	32	58	163
K13820	flagellar biosynthetic protein FliR/FlhB	42	31	74	30	12	25	12	92	18	8	13	44	6	22	21
K03042	DNA-directed RNA polymerase subunit A" [EC:2.7.7.6]	0	0	0	0	0	1	0	0	0	0	0	0	2	0	0
K03043	DNA-directed RNA polymerase subunit beta [EC:2.7.7.6]	9660	9774	13897	10242	10654	14130	7296	11924	11349	5875	8689	8794	9893	8400	8792
K03040	DNA-directed RNA polymerase subunit alpha [EC:2.7.7.6]	9739	10002	15332	13187	11455	15325	9478	12665	11843	9320	12950	10027	13670	12319	9537
K03041	DNA-directed RNA polymerase subunit A' [EC:2.7.7.6]	0	0	0	0	0	1	0	0	0	0	0	0	2	0	0
K03046	DNA-directed RNA polymerase subunit beta' [EC:2.7.7.6]	10765	10026	15632	11857	11121	15243	8489	12652	11843	7771	10969	9601	12141	10540	9341
K03047	DNA-directed RNA polymerase subunit D [EC:2.7.7.6]	0	0	0	0	0	1	0	0	0	0	0	0	2	0	0
K03044	DNA-directed RNA polymerase subunit B' [EC:2.7.7.6]	0	0	0	0	0	1	0	0	0	0	0	0	2	0	0
K03045	DNA-directed RNA polymerase subunit B" [EC:2.7.7.6]	0	0	0	0	0	1	0	0	0	0	0	0	2	0	0
K00348	Na+-transporting NADH:ubiquinone oxidoreductase subunit C [EC:1.6.5.-]	852	1665	212	6	4258	104	2834	1568	3879	930	252	1325	881	596	3006
K09847	spheroidene monooxygenase [EC:1.-.-.-]	0	0	0	0	0	0	0	1	0	0	0	0	0	0	0
K00692	levansucrase [EC:2.4.1.10]	573	81	385	59	348	676	5	35	253	18	25	20	35	20	71
K00638	chloramphenicol O-acetyltransferase [EC:2.3.1.28]	1448	1372	3227	2321	1230	2492	1358	3867	1170	3153	4963	5251	3696	5051	2908
K00639	glycine C-acetyltransferase [EC:2.3.1.29]	757	1876	567	484	349	581	289	2416	497	1466	697	2842	1778	1495	6835
K00634	phosphate butyryltransferase [EC:2.3.1.19]	930	2046	1059	832	551	1119	417	2201	558	1148	533	2773	721	1280	490
K00635	diacylglycerol O-acyltransferase [EC:2.3.1.20]	306	6	18	10	7456	21	4122	31	6625	2	2	0	1	5	87
K00631	glycerol-3-phosphate O-acyltransferase [EC:2.3.1.15]	233	19	38	8	5050	15	2814	61	3689	1	1	3	1	2	71
K00632	acetyl-CoA acyltransferase [EC:2.3.1.16]	1253	120	1083	184	5397	260	2836	1321	4053	96	148	106	192	177	1434
K00633	galactoside O-acetyltransferase [EC:2.3.1.18]	540	646	886	723	510	1794	89	1098	570	242	361	427	325	441	233
K00691	maltose phosphorylase [EC:2.4.1.8]	1199	330	1521	1385	236	1983	158	98	1097	28	61	50	126	29	511
K00696	sucrose-phosphate synthase [EC:2.4.1.14]	0	1	4	3	3	2	0	13	2	0	0	0	0	0	1
K00694	cellulose synthase (UDP-forming) [EC:2.4.1.12]	1999	94	1608	150	94	281	140	1536	244	157	100	263	134	115	269
K00695	sucrose synthase [EC:2.4.1.13]	958	11	717	2	0	90	0	10	84	2	0	1	1	2	0
K10854	acetone carboxylase, alpha subunit [EC:6.4.1.6]	0	0	2	0	0	0	1	1	0	0	0	0	0	0	0
K07811	trimethylamine-N-oxide reductase (cytochrome c) 1 [EC:1.7.2.3]	1	0	22	2	0	3	0	1	159	0	0	2	0	0	1
K07810	Cu(I)/Ag(I) efflux system periplasmic protein CusF	60	54	32	97	298	6	78	1285	5	112	23	150	48	53	49
K07813	accessory gene regulator B	1619	1321	3153	1472	561	1370	443	3571	941	2232	3276	6968	2274	3937	3660
K07812	trimethylamine-N-oxide reductase (cytochrome c) 2 [EC:1.7.2.3]	100	106	65	203	19	22	156	2631	17	225	46	301	98	109	98
K07814	putative two-component system response regulator	235	453	611	339	897	646	76	1391	790	306	334	696	459	437	353
K07816	putative GTP pyrophosphokinase [EC:2.7.6.5]	1653	727	2174	1913	693	3667	462	881	1583	141	254	567	296	321	1178
K00090	gluconate 2-dehydrogenase [EC:1.1.1.215]	20	4	39	12	998	14	5	61	40	0	2	3	2	1	95
K00091	dihydroflavonol-4-reductase [EC:1.1.1.219]	1972	100	1633	44	370	393	5	214	255	123	166	253	174	162	190
K00094	galactitol-1-phosphate 5-dehydrogenase [EC:1.1.1.251]	13	3	22	5	1	3	0	1	0	13	9	22	17	4	5
K00096	glycerol-1-phosphate dehydrogenase [NAD(P)] [EC:1.1.1.261]	238	337	637	325	137	326	216	700	157	229	219	398	219	186	352
K00097	4-hydroxythreonine-4-phosphate dehydrogenase [EC:1.1.1.262]	2588	2372	2910	927	5420	898	3189	6582	4423	1854	1099	4859	1706	2488	3929
K00098	L-idonate 5-dehydrogenase [EC:1.1.1.264]	15	28	167	90	95	88	5	806	81	4	5	4	3	7	7
K00099	1-deoxy-D-xylulose-5-phosphate reductoisomerase [EC:1.1.1.267]	8400	9492	12879	10274	10708	12662	8293	11060	10354	7645	10808	9470	11771	10363	5821
K10228	sorbitol/mannitol transport system permease protein	11	15	141	81	987	85	6	751	107	4	8	3	4	11	8
K10229	sorbitol/mannitol transport system permease protein	11	15	141	80	987	84	6	749	107	4	8	3	4	11	8
K10220	4-oxalmesaconate hydratase [EC:4.2.1.83]	2	2	11	4	6	7	0	52	7	0	1	0	1	0	1
K10221	2-pyrone-4,6-dicarboxylate lactonase [EC:3.1.1.57]	2	1	7	2	4	4	0	39	6	0	1	0	1	0	1
K10227	sorbitol/mannitol transport system substrate-binding protein	11	15	144	82	987	85	6	768	107	4	8	4	5	12	8
K05822	tetrahydrodipicolinate N-acetyltransferase [EC:2.3.1.89]	587	76	428	450	12	712	73	20	276	2	1	2	16	3	85
K01945	phosphoribosylamine--glycine ligase [EC:6.3.4.13]	8535	9535	13239	10466	10645	12893	8139	12221	10534	7653	10787	9282	11730	10249	8907
K01947	biotin-[acetyl-CoA-carboxylase] ligase / type III pantothenate kinase [EC:6.3.4.15 2.7.1.33]	0	1	2	0	0	1	0	14	1	0	0	0	0	0	0
K01941	urea carboxylase [EC:6.3.4.6]	91	97	139	50	130	64	5	291	62	81	53	110	61	61	115
K01940	argininosuccinate synthase [EC:6.3.4.5]	8208	8604	12296	9266	10459	12194	7204	10966	10279	5874	8700	8760	9770	8332	5792
K07729	putative transcriptional regulator	5010	4688	13690	4992	3292	13583	2392	10378	5922	6198	9078	17083	6506	11981	11480
K07728	putative transcriptional regulator	0	0	0	0	0	1	0	0	0	0	0	0	2	0	0
K07727	putative transcriptional regulator	5463	3600	11437	3892	6824	9723	5177	7696	8103	4619	6122	10834	5057	8292	5278
K07726	putative transcriptional regulator	2388	1283	3389	1172	1514	2758	406	4846	1191	1340	2508	4982	1276	2742	2290
K07724	Ner family transcriptional regulator	14	17	43	3	0	6	0	25	3	0	1	5	0	0	3
K07723	CopG family transcriptional regulator	81	99	181	40	33	119	20	366	86	412	251	1249	442	584	455
K07722	CopG family transcriptional regulator, nickel-responsive regulator	107	171	100	105	14	52	83	1549	36	164	79	254	178	117	136
K07721	ArsR family transcriptional regulator	0	0	0	0	0	1	0	0	0	0	0	0	2	0	0
K07720	two-component system, response regulator YesN	4079	3796	9036	2832	1766	9283	1031	9307	3803	5653	8342	16368	6458	9957	8625
K00899	5-methylthioribose kinase [EC:2.7.1.100]	74	119	274	336	279	416	72	834	231	56	111	343	79	180	198
K05824	homoisocitrate dehydrogenase [EC:1.1.1.87]	0	1	1	0	0	0	0	24	1	0	0	0	0	0	0
K00891	shikimate kinase [EC:2.7.1.71]	4774	5962	9517	2611	6906	9985	3681	11168	7936	3682	5828	9620	4132	6308	8934
K00892	inosine kinase [EC:2.7.1.73]	14	1	22	3	1	3	0	1	161	0	0	2	0	0	1
K00895	pyrophosphate--fructose-6-phosphate 1-phosphotransferase [EC:2.7.1.90]	538	1643	240	16	16	108	3	1809	75	240	234	367	474	305	267
K00897	aminoglycoside 3'-phosphotransferase [EC:2.7.1.95]	132	311	655	272	549	503	147	882	357	181	456	472	267	705	489
K08151	MFS transporter, DHA1 family, tetracycline resistance protein	1025	149	1007	246	168	240	89	3074	220	117	33	158	61	75	59
K08153	MFS transporter, DHA1 family, multidrug resistance protein	30	70	82	572	92	28	212	95	27	11	24	23	19	30	1521
K08154	MFS transporter, DHA1 family, 2-module integral membrane pump EmrD	14	1	23	3	1	3	0	1	161	0	0	2	0	0	1
K02948	small subunit ribosomal protein S11	9790	9997	14906	11850	11120	15153	8488	12530	11760	7777	10994	9705	12066	10470	9406
K02944	large subunit ribosomal protein LX	0	0	0	0	0	1	0	0	0	0	0	0	2	0	0
K02946	small subunit ribosomal protein S10	9099	9638	13690	10900	10919	13855	8400	12189	10910	7622	10838	9459	11740	10377	8928
K13793	secreted effector OspE	0	0	21	0	0	3	0	0	0	0	0	2	0	0	1
K01769	guanylate cyclase, other [EC:4.6.1.2]	1	0	3	0	2	2	0	14	2	0	0	0	0	0	0
K01768	adenylate cyclase [EC:4.6.1.1]	4001	328	3251	270	146	579	114	3008	650	427	381	621	826	346	392
K01761	methionine-gamma-lyase [EC:4.4.1.11]	271	649	436	553	678	484	274	1745	484	34	99	308	29	198	553
K01760	cystathionine beta-lyase [EC:4.4.1.8]	1004	876	3153	2276	1130	3715	575	4298	2879	383	317	490	717	435	1555
K01762	1-aminocyclopropane-1-carboxylate synthase [EC:4.4.1.14]	0	0	0	1	0	0	0	0	0	2	3	0	0	3	1
K01766	cysteine sulfinate desulfinase [EC:4.4.1.-]	19	2	25	3	901	5	0	5	36	0	0	3	0	1	1
K08164	MFS transporter, DHA1 family, chloramphenicol resistance protein	1	9	108	67	76	64	6	633	61	1	3	1	2	6	506
K02493	methyltransferase [EC:2.1.1.-]	9609	8983	10918	11796	10707	10087	8465	11376	9625	7680	10752	9495	11992	9842	9080
K08166	MFS transporter, DHA2 family, methylenomycin A resistance protein	2	1	8	3	1	4	0	13	2	0	0	1	0	0	0
K08167	MFS transporter, DHA2 family, methyl viologen resistance protein SmvA	29	15	142	89	229	107	17	672	90	3	7	2	4	10	31
K02496	uroporphyrin-III C-methyltransferase [EC:2.1.1.107]	26	19	43	10	904	12	0	96	202	1	1	3	2	1	4
K02497	HemX protein	0	0	3	3	1	2	1	3	1	0	0	0	0	0	506
K02494	outer membrane lipoprotein LolB	234	21	54	15	5054	22	2814	129	3693	1	2	3	3	2	72
K02495	oxygen-independent coproporphyrinogen III oxidase [EC:1.3.99.22]	12287	13452	17837	12264	17131	16280	11877	23732	15907	10207	14442	17353	14618	14836	15772
K02498	HemY protein	29	32	184	94	995	94	7	863	274	2	5	5	5	8	9
K02499	tetrapyrrole methylase family protein / MazG family protein	1270	2256	5920	1037	802	6049	397	4192	2777	1171	1000	5332	882	3180	1484
K08168	MFS transporter, DHA2 family, metal-tetracycline-proton antiporter	0	0	0	0	0	0	0	0	0	0	0	0	0	0	3
K08169	MFS transporter, DHA2 family, multidrug resistance protein	49	53	164	84	128	96	5	716	81	30	37	52	55	44	25
K14415	tRNA-splicing ligase RtcB [EC:6.5.1.3];protein RtcB	119	33	171	10	4271	182	1317	116	3227	48	57	64	52	51	100
K14414	transcriptional regulatory protein RtcR	18	2	32	4	762	6	1	22	34	2	1	5	5	8	2
K06881	None	5101	5579	10926	4872	2153	11168	2114	9305	5170	5059	6192	9550	5646	7637	8071
K00436	hydrogen dehydrogenase [EC:1.12.1.2]	1	1	9	5	1	1	1	23	0	0	0	0	1	2	0
K06332	spore coat protein JA	0	0	1	1	0	1	1	0	0	0	0	0	0	0	436
K06885	None	2373	705	3403	3459	1029	3462	1447	1115	1763	1904	2308	1090	2559	2286	4662
K00437	cytochrome-c3 hydrogenase [EC:1.12.2.1]	40	32	84	27	13	31	10	84	22	8	17	81	5	39	22
K06335	spore coat protein M	0	0	0	0	0	0	0	0	0	0	0	0	0	0	3
K06334	spore coat protein JC	1516	1406	2997	1356	802	2496	610	3452	1121	1934	3231	6670	2002	3981	3549
K03547	exonuclease SbcD	3144	2212	4436	2208	6096	3748	3650	6441	5383	1822	3242	6201	2049	3900	6452
K03546	exonuclease SbcC	4029	2131	4590	2163	6063	2917	3651	6321	5168	2104	3332	7219	2390	4327	6569
K03545	trigger factor	10919	10809	17053	12763	11673	17099	8751	14902	12542	8817	13293	13414	13151	12722	11304
K03544	ATP-dependent Clp protease ATP-binding subunit ClpX	10252	10311	14911	10430	10921	15784	7502	13142	11875	6501	10680	9793	10729	9184	10538
K03543	multidrug resistance protein A	249	345	477	241	2639	249	50	2366	611	870	267	1234	538	555	248
K06888	None	1011	152	1122	322	223	392	218	1044	258	71	132	100	88	130	143
K10941	sigma-54 specific transcriptional regulator, flagellar regulatory protein A	6	2	4	0	903	3	0	12	197	1	0	0	1	1	0
K03549	KUP system potassium uptake protein	6646	6782	10072	8585	5757	11732	3870	4620	6462	2728	5017	226	6542	3464	1871
K03548	putative permease	24	17	27	3	901	5	0	29	196	0	0	3	0	1	2
K02236	leader peptidase (prepilin peptidase) / N-methyltransferase [EC:3.4.23.43 2.1.1.-]	2387	725	3099	2560	544	3965	535	286	2207	118	217	148	463	136	2078
K02237	competence protein ComEA	7328	7499	11728	9448	10369	14150	7125	6458	11023	4238	7919	4256	8496	6116	5401
K02234	cobalamin biosynthesis protein CobW	968	25	864	87	890	171	7	770	190	3	5	3	4	10	6
K02232	adenosylcobyric acid synthase [EC:6.3.5.10]	2833	2063	4137	1502	1766	2943	505	5521	1631	1526	3011	5612	1617	3527	3260
K02233	adenosylcobinamide-GDP ribazoletransferase [EC:2.7.8.26]	3090	2166	4336	1505	5944	3191	3319	5824	5222	2008	3284	6936	2122	4118	3617
K02230	cobaltochelatase CobN [EC:6.6.1.2]	1019	128	930	105	1013	216	16	1263	226	29	26	128	35	41	38
K02231	adenosylcobinamide kinase / adenosylcobinamide-phosphate guanylyltransferase [EC:2.7.1.156 2.7.7.62]	5395	3885	7870	3077	3634	6167	892	10892	3160	3044	4262	10992	3318	6434	5279
K02238	competence protein ComEC	10354	9352	11436	10806	10472	10391	7662	10535	9632	6525	9357	12055	10367	9666	7470
K02239	competence protein ComER	0	0	1	1	0	0	0	0	0	0	0	0	0	0	7
K03723	transcription-repair coupling factor (superfamily II helicase) [EC:3.6.4.-];transcription-repair coupling factor (superfamily II helicase) [EC:3.6.1.-]	9614	9882	14685	11766	11113	15092	8480	12347	11715	7615	10847	9463	11917	10341	8762
K03722	ATP-dependent DNA helicase DinG [EC:3.6.4.12];ATP-dependent DNA helicase DinG [EC:3.6.1.-]	3165	2055	7890	2252	1758	7734	562	4717	4131	1056	1092	3783	1046	2593	2819
K03721	transcriptional regulator of aroF, aroG, tyrA and aromatic amino acid transport	54	62	142	257	1096	343	67	104	354	22	59	237	22	138	25
K03720	TrpR family transcriptional regulator, trp operon repressor	226	28	26	5	3852	8	2803	55	3639	77	69	122	198	35	35
K03727	ATP-dependent RNA helicase HelY [EC:3.6.1.-];ATP-dependent RNA helicase HelY [EC:3.6.4.-]	4474	4556	3937	7004	3925	3946	3683	1529	2885	2685	4829	138	6401	2851	1260
K03726	helicase [EC:3.6.1.-];helicase [EC:3.6.4.-]	0	1	0	0	4	1	0	0	0	2	0	0	2	0	0
K03725	archaea-specific helicase [EC:3.6.1.-]	0	0	0	0	0	1	0	0	0	0	0	0	2	0	0
K03724	ATP-dependent helicase Lhr and Lhr-like helicase [EC:3.6.1.-];ATP-dependent helicase Lhr and Lhr-like helicase [EC:3.6.4.-]	5090	4683	4600	7164	5156	4767	3698	2648	3293	2776	4955	245	6523	2967	1424
K12678	AIDA-I adhesin-like protein	1	0	1	1	0	0	0	0	0	0	0	0	0	0	0
K06410	dipicolinate synthase subunit A	923	926	2032	1020	357	741	540	2415	589	1440	1336	5189	1306	2929	2199
K11898	type VI secretion system protein ImpE	5	0	1	2	2	2	0	9	0	0	0	0	0	0	0
K11899	type VI secretion system protein ImpD	0	0	0	0	0	1	0	3	0	0	0	0	0	0	0
K11896	type VI secretion system protein ImpG	63	77	49	19	1416	14	1	274	44	2	3	1	1	5	25
K11897	type VI secretion system protein ImpF	12	3	25	14	594	12	1	76	37	0	0	0	0	1	24
K11894	type VI secretion system protein ImpI	16	58	40	13	659	8	1	237	8	2	2	1	1	4	1
K11895	type VI secretion system protein ImpH	57	63	48	19	1416	14	1	252	44	2	3	1	1	5	25
K11892	type VI secretion system protein ImpK	49	63	55	23	1126	15	1	281	41	2	3	1	1	5	25
K11893	type VI secretion system protein ImpJ	66	86	58	24	1418	15	2	376	43	76	94	71	140	136	231
K11890	type VI secretion system protein ImpM	12	3	22	12	594	11	1	74	37	0	0	0	0	1	24
K11891	type VI secretion system protein ImpL	50	63	55	24	1420	15	1	283	44	2	2	1	1	5	25
K08762	diazepam-binding inhibitor (GABA receptor modulator, acyl-CoA-binding protein)	0	2	8	8	3	8	0	67	3	0	0	0	0	0	0
K11325	L-cysteine/cystine lyase	959	11	718	2	0	92	0	11	86	2	0	1	1	3	0
K11329	two-component system, OmpR family, response regulator RpaB	1917	23	1437	5	0	182	0	28	170	3	1	2	2	4	0
K00151	5-carboxymethyl-2-hydroxymuconic-semialdehyde dehydrogenase [EC:1.2.1.60]	25	8	41	24	601	36	9	157	64	2	4	1	3	5	12
K00150	glyceraldehyde-3-phosphate dehydrogenase (NAD(P)) [EC:1.2.1.59]	959	11	717	2	0	92	0	11	84	2	0	1	2	2	0
K00153	NAD/factor-dependent formaldehyde dehydrogenase [EC:1.2.1.66];S-(hydroxymethyl)mycothiol dehydrogenase [EC:1.1.1.306]	12	6	30	16	12	42	14	29	26	2	4	1	2	4	5
K00400	methyl coenzyme M reductase system, component A2	0	0	0	0	1	2	0	0	0	1	0	0	3	0	1
K00407	cytochrome c oxidase cb-type subunit IV;cb-type cytochrome c oxidase subunit IV [EC:1.9.3.1]	224	19	171	96	5901	99	2821	863	3797	3	6	3	5	11	53
K00406	cb-type cytochrome c oxidase subunit III [EC:1.9.3.1];cytochrome c oxidase cb-type subunit III	233	24	197	112	5915	119	2822	993	3804	5	8	6	10	19	2846
K00405	cb-type cytochrome c oxidase subunit II [EC:1.9.3.1];cytochrome c oxidase cb-type subunit II	239	27	200	112	6012	117	2822	1025	3806	13	8	9	299	19	2860
K00404	cb-type cytochrome c oxidase subunit I [EC:1.9.3.1];cytochrome c oxidase cb-type subunit I [EC:1.9.3.1]	236	25	191	104	6514	110	2822	955	3835	5	7	6	10	19	54
K00158	pyruvate oxidase [EC:1.2.3.3]	593	77	447	85	42	741	66	36	289	2	1	8	2	5	83
K01342	subtilisin [EC:3.4.21.62]	0	0	1	1	0	0	1	0	0	0	0	0	0	0	75
K09388	hypothetical protein	0	0	1	1	0	0	1	0	0	0	0	0	0	0	71
K09386	hypothetical protein	6	16	145	83	96	87	6	774	79	1	5	2	2	10	7
K09384	hypothetical protein	1425	766	2260	2110	868	2774	435	1003	1591	87	233	96	216	190	596
K04094	methylenetetrahydrofolate--tRNA-(uracil-5-)-methyltransferase [EC:2.1.1.74];glucose inhibited division protein Gid	3535	2986	9173	3660	1508	8864	1692	6479	4289	3221	3495	6193	3453	5391	2986
K04095	cell filamentation protein	1175	2321	2586	527	1267	3857	317	4702	2249	305	257	479	236	405	304
K04096	DNA processing protein	9787	10081	15512	13314	11533	15410	9490	13474	11919	9454	13041	10140	14022	12460	9609
K04097	glutathione S-transferase [EC:2.5.1.18]	14	9	86	47	1194	48	14	339	238	1	4	1	4	4	32
K04090	indolepyruvate ferredoxin oxidoreductase [EC:1.2.7.8]	6	6	48	22	331	27	4	184	13	0	3	0	1	2	2
K04091	alkanesulfonate monooxygenase [EC:1.14.14.5]	69	26	204	93	3939	126	30	546	283	7	10	9	9	20	139
K04092	chorismate mutase [EC:5.4.99.5]	4468	4565	4059	7080	4051	4010	3682	2249	2946	2686	4834	140	6404	2856	1265
K04093	chorismate mutase [EC:5.4.99.5]	6	1	0	0	0	1	0	2	0	0	0	0	2	0	0
K04098	hydroxyquinol 1,2-dioxygenase [EC:1.13.11.37]	3	2	19	9	9	13	2	61	10	1	0	1	0	0	1
K04099	protocatechuate 4,5-dioxygenase [EC:1.13.11.8]	0	0	4	1	3	2	0	16	2	0	0	0	0	0	0
K01578	malonyl-CoA decarboxylase [EC:4.1.1.9]	2	1	21	7	9	7	1	62	6	0	2	0	0	0	1
K01579	aspartate 1-decarboxylase [EC:4.1.1.11]	2118	2130	1528	242	5012	548	2874	3256	3887	1672	849	3041	1688	1563	4354
K01574	acetoacetate decarboxylase [EC:4.1.1.4]	587	246	1113	910	192	1270	80	137	827	21	58	27	106	19	422
K01575	acetolactate decarboxylase [EC:4.1.1.5]	312	673	186	557	22	68	173	2849	55	138	34	152	163	60	121
K01576	benzoylformate decarboxylase [EC:4.1.1.7]	209	3	32	13	4408	22	2803	99	3525	2	1	1	1	1	20
K01577	oxalyl-CoA decarboxylase [EC:4.1.1.8]	4158	4085	2010	6821	3477	1324	3630	611	933	2679	4784	142	6397	2753	1252
K01571	oxaloacetate decarboxylase, alpha subunit [EC:4.1.1.3]	1666	1816	2857	1221	841	2677	477	4534	1375	1869	3193	6077	2228	3743	3035
K01572	oxaloacetate decarboxylase, beta subunit [EC:4.1.1.3]	1616	1538	3006	1170	854	2837	495	3475	1435	2723	3712	6932	2892	4178	3602
K01573	oxaloacetate decarboxylase, gamma subunit [EC:4.1.1.3]	44	52	17	0	102	20	0	39	177	27	34	58	49	37	20
K02009	cobalt transport protein	112	186	402	319	229	558	81	340	240	131	179	483	142	255	579
K02008	cobalt/nickel transport system permease protein	16730	20865	58087	17045	11561	67541	7371	29406	30721	11411	18839	23345	16576	22955	14576
K02005	HlyD family secretion protein	7593	3997	7497	2990	1215	3467	1616	8269	2026	5183	4128	8734	5172	6346	5398
K02004	None	39727	35788	70599	44221	31580	74501	24477	49202	45243	37434	49565	57954	50850	51951	39809
K02007	cobalt/nickel transport system permease protein	2382	1685	3364	1398	654	1559	487	5282	980	1612	2531	6011	1504	3182	2669
K02006	cobalt/nickel transport system ATP-binding protein	34319	37856	75329	42672	24850	83609	20215	40885	40852	23459	39021	31881	40177	38127	23217
K02001	glycine betaine/proline transport system permease protein	293	219	464	524	5873	226	3265	1832	3763	54	98	100	68	116	649
K02000	glycine betaine/proline transport system ATP-binding protein [EC:3.6.3.32]	97	217	471	531	2019	223	462	1809	286	53	95	100	65	115	631
K02003	None	44900	42571	85065	54607	37709	89200	29507	57939	50894	41853	64015	66218	60485	63106	48845
K02002	glycine betaine/proline transport system substrate-binding protein	127	238	716	675	6564	373	474	3109	615	51	103	102	72	128	1086
K03060	DNA-directed RNA polymerase subunit omega [EC:2.7.7.6]	8913	8002	13593	10160	10575	13963	7456	9816	11249	4795	8309	7259	8819	7595	5575
K10948	hemolysin	1	0	0	0	0	0	0	0	0	0	0	0	0	0	0
K09607	immune inhibitor A [EC:3.4.24.-]	2	1	4	1	1	6	1	4	162	0	1	0	0	0	4
K04337	curli production assembly/transport component CsgE	5	0	22	3	1	3	0	0	161	0	0	2	0	0	1
K06120	glycerol dehydratase large subunit [EC:4.2.1.30]	2	2	1	4	0	0	0	1	0	13	8	19	17	3	4
K04336	curli production protein	5	0	22	3	1	3	0	0	0	0	0	2	0	0	1
K09703	hypothetical protein	13	22	49	32	33	44	5	159	30	21	20	29	60	25	529
K00004	(R,R)-butanediol dehydrogenase / diacetyl reductase [EC:1.1.1.4 1.1.1.303]	224	10	79	33	4173	67	2835	129	3538	5	8	3	4	7	98
K14699	ATP-binding cassette, subfamily B, bacterial IrtB [EC:3.6.3.-]	0	0	0	1	0	1	0	2	0	0	0	0	0	0	0
K09702	hypothetical protein	137	176	229	75	71	103	9	447	68	184	183	310	238	232	332
K14698	ATP-binding cassette, subfamily B, bacterial IrtA [EC:3.6.3.-]	0	0	0	1	0	1	0	2	0	0	0	0	0	0	0
K05311	central glycolytic genes regulator	1610	1057	2007	1368	414	2416	272	1372	1321	168	183	1049	169	471	1087
K13829	shikimate kinase / 3-dehydroquinate synthase [EC:2.7.1.71 4.2.3.4]	8935	9123	7827	13973	7826	7809	7332	3120	5708	5438	9741	345	12937	5822	2718
K10943	two component system, response regulator FlrC	6	3	11	7	909	10	1	39	200	1	1	0	1	2	1
K07291	None	0	0	1	0	0	0	0	0	0	0	0	0	0	0	0
K07290	hypothetical protein	12	2	39	15	808	20	1	86	39	0	1	3	2	2	2
K10206	LL-diaminopimelate aminotransferase [EC:2.6.1.83]	4272	4061	9521	2803	1513	8733	1428	7599	3838	3927	5676	7612	4287	6813	3887
K10202	N-acetylglucosamine transport system permease protein	5	12	33	5	2	86	0	11	27	7	7	12	2	12	2
K10208	dehydrosqualene synthase [EC:2.5.1.-]	0	0	0	1	0	1	0	2	0	0	0	0	0	0	0
K10209	dehydrosqualene desaturase [EC:1.14.99.-]	23	23	55	13	2	24	59	82	14	6	8	25	3	13	92
K01966	propionyl-CoA carboxylase beta chain [EC:6.4.1.3]	550	1539	452	138	129	248	33	2469	176	137	139	190	226	236	679
K01965	propionyl-CoA carboxylase alpha chain [EC:6.4.1.3]	49	23	213	105	104	113	10	909	86	2	7	3	4	9	8
K01964	acetyl-CoA/propionyl-CoA carboxylase [EC:6.4.1.2 6.4.1.3]	0	5	1	1	0	1	0	7	1	17	24	19	33	17	64
K01963	acetyl-CoA carboxylase carboxyl transferase subunit beta [EC:6.4.1.2]	2939	1633	4109	2362	6164	2881	3689	5964	4966	1766	3190	6111	2152	3733	7042
K01962	acetyl-CoA carboxylase carboxyl transferase subunit alpha [EC:6.4.1.2]	2334	1178	3317	2148	5871	1413	3656	4886	4508	1260	1307	5319	1112	2897	5567
K01961	acetyl-CoA carboxylase, biotin carboxylase subunit [EC:6.4.1.2];acetyl-CoA carboxylase, biotin carboxylase subunit [EC:6.4.1.2 6.3.4.14]	7406	5054	16814	5794	17734	17499	10069	14458	18472	4719	7123	13895	5630	9176	14907
K01960	pyruvate carboxylase subunit B [EC:6.4.1.1]	647	1683	220	7	911	103	20	1683	103	1002	345	1408	735	732	362
K01969	3-methylcrotonyl-CoA carboxylase beta subunit [EC:6.4.1.4]	228	23	195	115	5158	136	2832	908	3791	5	10	4	7	13	78
K01968	3-methylcrotonyl-CoA carboxylase alpha subunit [EC:6.4.1.4]	220	18	168	96	5146	104	2821	858	3765	2	6	2	5	9	76
K07749	formyl-CoA transferase [EC:2.8.3.16]	4416	4178	2477	6935	8303	1666	6447	1374	4621	2822	4981	347	6551	2922	1904
K07748	sterol-4alpha-carboxylate 3-dehydrogenase (decarboxylating) [EC:1.1.1.170]	0	0	1	0	0	0	0	1	0	0	0	0	0	0	0
K07741	anti-repressor protein	667	375	1282	1568	384	1622	167	361	998	72	141	352	163	190	459
K07740	regulator of sigma D	18	2	25	3	901	5	0	7	196	0	0	3	0	1	1
K07742	hypothetical protein	4180	2611	6712	4697	1714	6058	1889	6451	3013	3879	5607	7858	4366	6238	4794
K07744	hypothetical protein	0	0	0	0	0	1	0	0	0	0	0	0	2	0	0
K07746	hypothetical protein	965	24	783	47	385	142	3	352	144	2	4	3	2	5	4
K01299	carboxypeptidase Taq [EC:3.4.17.19]	442	1296	5329	1567	855	6356	1025	2145	2819	1951	2426	844	2093	2705	1087
K01295	glutamate carboxypeptidase [EC:3.4.17.11]	159	297	227	225	609	93	160	3581	89	346	185	399	246	240	250
K01297	muramoyltetrapeptide carboxypeptidase [EC:3.4.17.13]	2501	1733	2828	931	4859	890	3203	5069	4121	953	805	4119	942	2181	5194
K02922	large subunit ribosomal protein L37e	0	0	0	0	0	1	0	0	0	0	0	0	2	0	0
K05603	formimidoylglutamate deiminase [EC:3.5.3.13]	13	2	8	2	799	4	1	20	34	0	1	0	0	1	1
K02921	large subunit ribosomal protein L37Ae	0	0	0	0	0	1	0	0	0	0	0	0	2	0	0
K02926	large subunit ribosomal protein L4	9791	9998	14908	11851	11120	15155	8488	12529	11761	7777	10995	9707	12064	10470	9406
K02924	large subunit ribosomal protein L39e	0	0	0	0	0	1	0	0	0	0	0	0	2	0	0
K02929	large subunit ribosomal protein L44e	0	0	0	0	0	1	0	0	0	0	0	0	2	0	0
K00216	2,3-dihydro-2,3-dihydroxybenzoate dehydrogenase [EC:1.3.1.28]	12	2	42	8	8	16	1	56	10	1	1	3	0	1	28
K00217	maleylacetate reductase [EC:1.3.1.32]	3	3	28	14	15	19	2	109	14	1	0	1	0	1	1
K00214	biliverdin reductase [EC:1.3.1.24]	1	0	0	0	0	0	0	0	0	0	0	0	0	0	0
K00215	dihydrodipicolinate reductase [EC:1.3.1.26]	13149	12998	11092	16834	13905	9124	11427	12047	9378	8763	13666	9427	16546	10917	9994
K00210	prephenate dehydrogenase [EC:1.3.1.12]	965	32	929	135	397	220	9	1266	236	4	7	4	7	15	9
K00218	protochlorophyllide reductase [EC:1.3.1.33]	960	11	719	3	0	93	0	12	85	2	1	1	1	2	0
K00219	2,4-dienoyl-CoA reductase (NADPH2) [EC:1.3.1.34]	332	143	680	1447	5413	294	3825	455	3846	1762	2106	625	1970	1952	420
K01035	acetate CoA-transferase beta subunit [EC:2.8.3.8]	2	2	25	11	11	3	2	2	2	0	2	3	0	2	3
K01034	acetate CoA-transferase alpha subunit [EC:2.8.3.8]	91	224	320	455	303	384	269	378	201	64	124	315	82	213	144
K04517	prephenate dehydrogenase [EC:1.3.1.12]	6814	8009	12255	10679	5795	12895	5497	8880	6756	7521	10814	9232	11464	10217	8765
K01740	O-acetylhomoserine (thiol)-lyase [EC:2.5.1.49]	13583	15516	19595	19717	15012	19167	13079	15968	14357	14563	21159	16321	22676	19024	10906
K01031	3-oxoadipate CoA-transferase, alpha subunit [EC:2.8.3.6]	19	16	145	87	385	96	25	726	97	4	7	2	4	10	79
K01746	formiminotetrahydrofolate cyclodeaminase [EC:4.3.1.4]	268	669	285	460	288	360	265	1176	185	47	102	315	54	197	43
K01745	histidine ammonia-lyase [EC:4.3.1.3]	447	373	604	657	7220	588	3177	2939	4278	376	384	717	719	576	3859
K01744	aspartate ammonia-lyase [EC:4.3.1.1]	5802	7385	4350	7398	9044	3882	6870	7728	6404	4303	5454	2992	7597	4222	5444
K01749	hydroxymethylbilane synthase [EC:2.5.1.61]	2347	1400	2372	838	5701	2266	3072	5323	4635	1176	2224	3066	1402	1822	5443
K01039	glutaconate CoA-transferase, subunit A [EC:2.8.3.12]	55	102	144	263	1005	355	67	334	198	37	70	248	51	151	30
K04518	prephenate dehydratase [EC:4.2.1.51]	1456	1034	1137	149	149	422	67	2474	329	1443	576	2558	1603	1286	3982
K14128	F420-non-reducing hydrogenase subunit G [EC:1.12.99.-]	0	1	0	0	4	1	0	1	0	2	0	0	2	0	0
K14121	energy-converting hydrogenase B subunit L	0	0	0	0	0	1	0	0	0	0	0	0	2	0	0
K14120	energy-converting hydrogenase B subunit K	0	0	0	0	0	1	0	0	0	0	0	0	2	0	0
K14123	energy-converting hydrogenase B subunit N	0	0	0	0	0	1	0	0	0	0	0	0	2	0	0
K14122	energy-converting hydrogenase B subunit M	0	0	0	0	0	1	0	0	0	0	0	0	2	0	0
K14125	energy-converting hydrogenase B subunit P	0	0	0	0	0	1	0	0	0	0	0	0	2	0	0
K14124	energy-converting hydrogenase B subunit O	0	0	0	0	0	1	0	0	0	0	0	0	2	0	0
K14127	F420-non-reducing hydrogenase iron-sulfur subunit D [EC:1.12.99.-]	0	1	0	0	4	2	0	1	0	2	0	0	3	0	2
K14126	F420-non-reducing hydrogenase subunit A [EC:1.12.99.-]	0	1	0	0	4	1	0	1	0	2	0	0	2	0	0
K03521	electron transfer flavoprotein beta subunit	3715	5087	6727	4162	7396	3503	5142	11800	5862	5241	6225	11994	5206	8274	7750
K03520	carbon-monoxide dehydrogenase large subunit [EC:1.2.99.2]	4	6	61	27	35	39	2	226	28	1	3	1	0	3	3
K03523	putative biotin biosynthesis protein BioY	7813	8348	11984	9590	5580	11365	4496	10499	6334	5068	8553	7722	9103	7796	6489
K03522	electron transfer flavoprotein alpha subunit	3726	5123	6730	4165	7397	3502	5143	11925	5863	5262	6249	12020	5234	8287	7756
K03525	type III pantothenate kinase [EC:2.7.1.33]	8223	9192	16934	10401	10956	18044	8302	11350	12460	7756	11055	9668	11901	10999	8962
K03524	BirA family transcriptional regulator, biotin operon repressor / biotin-[acetyl-CoA-carboxylase] ligase [EC:6.3.4.15]	9045	10717	16459	9648	11143	18051	7500	14599	12602	6244	9119	9435	10195	9179	9078
K03527	4-hydroxy-3-methylbut-2-enyl diphosphate reductase [EC:1.17.1.2]	8396	9445	12994	10350	10788	12734	8296	11381	10414	7659	10814	9458	11784	10377	5815
K03526	(E)-4-hydroxy-3-methylbut-2-enyl-diphosphate synthase [EC:1.17.7.1]	8308	9355	12820	10134	10677	12668	8099	11435	10362	7651	10875	9530	11803	10361	6059
K03529	chromosome segregation protein	4944	4187	12651	5036	7669	13757	4836	10202	10773	4155	5947	8218	4775	7111	5189
K03528	cell division protein ZipA	233	19	35	6	5050	13	2814	55	3688	1	1	3	1	1	71
K06338	spore coat protein SA	1	0	0	0	0	0	0	0	0	0	0	0	0	0	0
K02217	ferritin [EC:1.16.3.1]	3242	4238	7617	2666	5119	6553	4419	6359	6759	3992	3530	7624	3935	5861	4940
K03299	gluconate:H+ symporter, GntP family	173	138	380	581	2009	266	46	932	276	115	86	187	100	131	524
K03298	drug/metabolite transporter, DME family	154	70	172	268	4098	363	1384	222	3344	40	84	257	54	155	569
K13472	sulfotransferase	2	0	1	0	294	0	0	2	2	0	0	0	0	0	0
K03293	amino acid transporter, AAT family	15218	12695	15989	21256	14314	16543	8366	8936	10924	6075	10475	3554	13700	7468	6562
K03292	glycoside/pentoside/hexuronide:cation symporter, GPH family	3897	3285	5423	1706	1102	4553	694	6266	2087	2537	6521	6967	3027	4751	5428
K03291	MFS transporter, SET family, sugar efflux transporter	23	6	52	18	15	17	1	105	13	1	1	3	0	1	2
K03290	MFS transporter, SHS family, sialic acid transporter	7	2	23	5	1	8	0	5	2	1	0	2	0	1	2
K03297	small multidrug resistance protein, SMR family	869	332	1410	1018	5368	1554	2917	1089	4485	145	217	164	306	210	2635
K03296	hydrophobic/amphiphilic exporter-1 (mainly G- bacteria), HAE1 family	4526	4959	4208	1702	8585	1813	3552	14979	5843	3189	1873	5635	3661	3198	6250
K03295	cation efflux system protein, CDF family	5957	5006	5517	8738	9159	5672	6900	4037	7418	3682	5160	1525	7353	3452	5806
K03294	basic amino acid/polyamine antiporter, APA family	12526	9407	15348	14308	6009	15581	4813	10412	10153	4343	8003	5954	8683	6583	6011
K13009	O-antigen polymerase	7	2	0	5	3	0	0	1	0	1	0	0	0	0	0
K07190	phosphorylase kinase alpha/beta subunit	958	11	717	2	0	90	0	12	84	2	0	1	1	2	0
K06021	phosphate-transporting ATPase [EC:3.6.3.27]	0	0	0	0	1	0	0	0	0	0	0	0	0	0	0
K07192	flotillin	1313	1322	4757	572	702	5019	348	2001	2458	350	493	750	410	984	1269
K06020	sulfate-transporting ATPase [EC:3.6.3.25]	46	55	30	100	6	12	78	1345	6	112	23	148	50	52	49
K06027	vesicle-fusing ATPase [EC:3.6.4.6]	0	0	4	1	2	2	0	16	2	0	0	0	0	0	0
K09744	hypothetical protein	959	12	719	2	0	90	0	22	85	2	0	1	1	2	0
K07991	archaeal preflagellin peptidase FlaK	8	1	31	2	0	26	0	2	17	2	2	6	4	8	4
K09835	carotenoid isomerase [EC:5.-.-.-]	961	11	718	3	294	91	0	11	87	2	0	1	1	2	0
K09834	tocopherol cyclase	959	11	717	2	0	90	0	10	84	2	0	1	1	2	0
K10439	ribose transport system substrate-binding protein	4838	4879	14784	6370	5368	18069	2063	14482	9025	5522	10529	10884	7092	9878	8836
K06351	inhibitor of KinA	23	20	48	14	2	20	5	78	13	7	11	21	3	15	92
K09833	homogenitisate phytyltransferase	959	11	717	2	0	90	0	10	84	2	0	1	1	2	0
K10925	MSHA pilin protein MshB	0	0	0	0	0	0	0	0	160	0	0	0	0	0	0
K10924	MSHA pilin protein MshA	1	1	7	3	2	2	0	24	322	0	0	0	0	0	1
K10927	MSHA pilin protein MshD	1	1	4	1	0	1	0	15	162	0	0	0	0	0	0
K10926	MSHA pilin protein MshC	1	1	4	1	0	1	0	14	162	0	0	0	0	0	0
K10697	two-component system, OmpR family, response regulator RpaA	959	11	717	2	0	90	0	10	84	2	0	1	1	2	0
K00179	indolepyruvate ferredoxin oxidoreductase, alpha subunit [EC:1.2.7.8]	913	1016	1495	703	670	2116	227	2852	886	1500	2915	4071	2085	2602	3145
K00172	pyruvate ferredoxin oxidoreductase, gamma subunit [EC:1.2.7.1]	246	359	413	401	247	509	156	1916	286	706	434	1819	727	858	610
K00171	pyruvate ferredoxin oxidoreductase, delta subunit [EC:1.2.7.1]	111	186	237	268	222	437	73	440	232	509	358	1537	576	746	446
K00170	pyruvate ferredoxin oxidoreductase, beta subunit [EC:1.2.7.1]	164	257	258	360	231	454	152	1715	244	633	384	1704	684	813	520
K00177	2-oxoglutarate ferredoxin oxidoreductase subunit gamma [EC:1.2.7.3]	1020	2240	987	860	572	1029	423	2832	578	1709	984	4239	1441	1965	1187
K00176	2-oxoglutarate ferredoxin oxidoreductase subunit delta [EC:1.2.7.3]	1017	2237	987	860	572	1029	423	2828	578	1705	977	4223	1439	1961	1183
K00175	2-oxoglutarate ferredoxin oxidoreductase subunit beta [EC:1.2.7.3]	1711	3958	1373	917	608	1194	458	4684	692	2702	1306	5798	2378	2622	4727
K00174	2-oxoglutarate ferredoxin oxidoreductase subunit alpha [EC:1.2.7.3]	1666	3904	1266	884	592	1171	452	4581	674	2646	1239	5659	2326	2546	4606
K14338	cytochrome P450 / NADPH-cytochrome P450 reductase [EC:1.14.14.1 1.6.2.4]	0	1	9	3	4	6	1	35	4	0	0	0	0	0	3
K14339	alpha-1,6-mannosyltransferase [EC:2.4.1.-]	8	2	13	9	6	18	7	14	9	1	1	0	1	2	1
K14335	alpha-1,6-mannosyltransferase [EC:2.4.1.-]	3	2	14	11	516	15	0	70	9	0	1	1	1	3	1
K14337	alpha-1,6-mannosyltransferase [EC:2.4.1.-]	7	1	13	9	3	15	7	13	7	1	1	0	1	2	1
K14330	fatty aldehyde-generating acyl-ACP reductase	959	11	717	2	0	90	0	10	84	2	0	1	1	2	0
K14331	fatty aldehyde decarbonylase	959	11	717	2	0	90	0	10	84	2	0	1	1	2	0
K14333	2,3-dihydroxybenzoate decarboxylase [EC:4.1.1.46]	1	0	7	4	4	4	0	24	3	0	0	1	0	2	0
K13479	xanthine dehydrogenase FAD-binding subunit [EC:1.17.1.4]	180	1059	3834	71	405	4625	22	1129	2051	150	253	172	168	654	186
K04078	chaperonin GroES	9794	9998	14961	11876	11151	15181	8486	12732	11777	7692	10878	9509	11994	10405	9119
K04079	molecular chaperone HtpG	4101	5073	9306	3376	6873	9135	4620	9911	7695	5015	6051	9453	5392	7562	4228
K04076	Lon-like ATP-dependent protease [EC:3.4.21.-]	73	92	147	34	33	111	15	357	77	407	218	1193	425	555	300
K04077	chaperonin GroEL	10766	10021	15720	11906	11165	15322	8503	12849	11891	7775	11000	9684	12061	10473	9401
K04074	cell division initiation protein	1742	1207	2229	1835	485	2578	317	1788	1434	791	659	2646	1045	1294	1880
K04075	tRNA(Ile)-lysidine synthase [EC:6.3.4.-]	9505	9323	14753	11363	10681	15124	8207	10144	11735	7566	10803	9352	11944	10282	9077
K04072	acetaldehyde dehydrogenase / alcohol dehydrogenase [EC:1.2.1.10 1.1.1.1]	14812	13505	23515	18498	10107	24870	8396	9904	13913	8092	13778	9500	15982	11940	7570
K04073	acetaldehyde dehydrogenase [EC:1.2.1.10]	9	5	19	11	26	17	3	94	7	0	2	0	3	3	9
K04070	putative pyruvate formate lyase activating enzyme [EC:1.97.1.4]	1925	2848	6851	1169	950	7405	494	6682	3175	1718	3080	5675	1844	3915	2936
K04071	6-pyruvoyltetrahydropterin 2'-reductase [EC:1.1.1.220]	0	0	0	0	0	0	0	1	0	0	1	1	0	2	0
K08280	lipopolysaccharide O-acetyltransferase [EC:2.3.1.-]	3	0	2	0	250	1	0	1	31	0	0	1	0	0	0
K13641	IclR family transcriptional regulator, acetate operon repressor	42	43	183	101	103	113	18	825	93	36	62	99	79	56	88
K13640	MerR family transcriptional regulator, heat shock protein HspR	4628	5554	7861	7044	4344	9000	3698	2641	5005	2712	4956	170	6466	3421	1319
K13643	Rrf2 family transcriptional regulator, iron-sulfur cluster assembly transcription factor	295	87	77	118	5063	30	2894	1536	3696	209	160	303	236	214	403
K13642	CRP/FNR family transcriptional regulator, transcriptional activator FtrB	1	10	103	65	73	64	5	632	59	1	3	2	2	6	4
K02027	multiple sugar transport system substrate-binding protein	24575	19990	42926	26218	17650	48220	10806	36567	26801	17790	29191	27672	28537	25652	22942
K02026	multiple sugar transport system permease protein	25752	24867	54581	27172	19761	61209	12720	47371	30865	24350	41377	45862	36313	37890	34815
K02025	multiple sugar transport system permease protein	26409	25292	54646	27471	19946	62679	12910	48673	30129	24728	41934	46388	36435	38484	35379
K02024	maltoporin	54	7	58	8	692	10	0	35	38	0	0	5	0	1	3
K02023	multiple sugar transport system ATP-binding protein	2293	722	4251	2266	3683	3241	446	10738	2225	372	395	478	450	403	861
K02022	None	2342	254	2105	376	5779	510	2844	3025	4163	108	120	152	154	114	228
K02021	putative ABC transport system ATP-binding protein	29	76	105	197	356	49	210	192	70	10	27	24	5	31	37
K02020	molybdate transport system substrate-binding protein	3033	3299	11179	2767	6642	10273	4359	9531	8548	3665	5044	6856	3747	6044	3512
K02029	polar amino acid transport system permease protein	19787	15817	26716	29672	33692	23968	21687	36462	25490	15974	23591	20809	24537	22203	15651
K02028	polar amino acid transport system ATP-binding protein [EC:3.6.3.21]	13851	12836	28634	20984	21961	30979	14789	24240	23727	12009	18128	15342	17045	18145	11670
K03886	menaquinol-cytochrome c reductase iron-sulfur subunit [EC:1.10.2.-]	0	2	10	9	4	9	1	70	3	0	0	0	0	0	502
K03887	menaquinol-cytochrome c reductase cytochrome b subunit;menaquinol-cytochrome c reductase cytochrome b subunit [EC:1.10.2.-]	0	1	3	2	3	1	1	2	1	1	0	0	0	0	506
K03885	NADH dehydrogenase [EC:1.6.99.3]	3836	2207	3603	1832	1498	2778	283	3722	1822	970	407	1581	1020	741	4643
K03888	menaquinol-cytochrome c reductase cytochrome b/c subunit [EC:1.10.2.-];menaquinol-cytochrome c reductase cytochrome b/c subunit	0	0	1	2	0	1	1	1	1	0	0	0	0	0	506
K03889	ubiquinol-cytochrome c reductase cytochrome c subunit	15	7	40	23	16	47	17	56	34	3	5	1	2	5	5
K12999	glucosyltransferase [EC:2.4.1.-]	11	11	4	14	3	1	22	14	1	87	68	111	290	27	15
K12992	rhamnosyltransferase [EC:2.4.1.-]	4629	4493	2565	6913	4225	2699	3640	1644	1333	2927	5076	527	6614	3044	1510
K12993	alpha-1,2-rhamnosyltransferase [EC:2.4.1.-]	2	0	2	0	507	1	0	4	2	0	0	0	0	1	0
K12990	rhamnosyltransferase [EC:2.4.1.-]	4191	4217	2195	7373	3590	1469	3837	830	993	2772	4882	295	6507	2843	1324
K12991	rhamnosyltransferase [EC:2.4.1.-]	2	0	2	0	507	1	0	4	2	0	0	0	0	1	0
K12996	rhamnosyltransferase [EC:2.4.1.-]	24	30	99	29	9	93	25	33	41	25	14	26	104	9	4
K12997	rhamnosyltransferase [EC:2.4.1.-]	86	38	100	80	7	66	27	123	35	96	44	110	173	33	84
K12994	alpha-1,3-rhamnosyltransferase [EC:2.4.1.-]	3	0	2	1	507	2	0	11	3	0	0	0	0	1	0
K12995	rhamnosyltransferase [EC:2.4.1.-]	19	26	11	3	509	5	0	24	9	34	30	52	50	33	40
K08979	putative membrane protein	0	0	0	0	0	1	0	0	0	0	0	0	2	0	0
K08978	putative membrane protein	1721	2544	7123	2619	1899	7595	1384	6094	3300	4364	4095	7442	4253	6289	2610
K03088	RNA polymerase sigma-70 factor, ECF subfamily	30188	34510	50929	21535	26607	38851	9563	64077	21832	30024	33690	82398	35848	50816	53444
K03089	RNA polymerase sigma-32 factor	345	165	431	304	5242	198	2911	3094	3851	119	71	164	76	92	182
K03086	RNA polymerase primary sigma factor	10897	13304	15786	12216	11257	15579	8784	17254	12010	8388	11623	10630	12916	11211	10205
K03087	RNA polymerase nonessential primary-like sigma factor	4833	81	3675	64	916	488	14	188	641	10	36	13	23	31	52
K08971	putative membrane protein	0	0	0	0	0	1	0	0	0	0	0	0	2	0	0
K08970	nickel/cobalt exporter	18	13	157	84	93	82	6	737	73	3	5	6	7	15	7
K03082	hexulose-6-phosphate isomerase [EC:5.-.-.-]	27	4	32	18	4	8	22	9	4	32	16	14	102	11	3
K03080	L-ribulose-5-phosphate 4-epimerase [EC:5.1.3.4]	7	1	22	2	0	3	0	1	1	0	0	2	0	0	1
K08974	putative membrane protein	791	893	1537	1019	4531	1492	3607	1806	4306	1530	1135	2539	1848	1597	4002
K00918	ADP-specific phosphofructokinase [EC:2.7.1.146];ADP-dependent phosphofructokinase/glucokinase [EC:2.7.1.146 2.7.1.147]	4	3	2	12	0	0	0	4	1	36	23	51	34	16	17
K12214	intracellular multiplication protein IcmL	0	0	2	0	0	0	0	0	0	0	0	0	0	0	0
K11646	dehydroquinate synthase II [EC:1.4.1.-]	11	57	19	0	1	2	0	173	3	2	2	1	2	3	1
K11641	two-component system, LytT family, response regulator NatR	0	0	1	1	0	0	0	0	0	0	0	0	0	0	4
K11640	two-component system, LytT family, sensor histidine kinase NatK [EC:2.7.13.3]	0	0	1	1	0	0	0	0	0	0	0	0	0	0	4
K07507	putative Mg2+ transporter-C (MgtC) family protein	4492	4712	9139	2431	7118	8535	3597	8454	7862	2387	1635	7106	2281	4081	2563
K07506	AraC family transcriptional regulator	1956	54	1510	39	1225	217	3	388	245	78	96	73	141	139	299
K07505	hypothetical protein	0	1	23	1	0	4	0	10	0	1	0	3	1	2	3
K07504	hypothetical protein	47	63	142	266	537	363	77	107	178	23	61	235	22	141	26
K07503	hypothetical protein	4474	4555	3935	7003	3925	3947	3682	1529	2882	2685	4829	138	6403	2850	1261
K07502	hypothetical protein	504	389	825	392	395	1890	78	794	567	307	384	666	310	437	933
K07501	hypothetical protein	215	6	27	14	4155	18	2814	120	3497	10	2	5	290	3	2876
K07508	acetyl-CoA acyltransferase 2 [EC:2.3.1.16]	0	0	0	0	0	0	0	1	0	0	0	0	0	0	0
K08698	carbon dioxide concentrating mechanism protein CcmM	959	11	717	2	0	90	0	10	84	2	0	1	1	2	0
K10773	endonuclease III [EC:4.2.99.18]	9776	10053	15026	11447	11088	15159	8526	12611	11783	7882	11131	9816	12167	10584	9603
K14286	alanine-glyoxylate aminotransferase 2-like [EC:2.6.1.-]	0	0	1	0	0	0	0	1	0	0	0	0	0	0	0
K10778	AraC family transcriptional regulator, regulatory protein of adaptative response / methylated-DNA-[protein]-cysteine methyltransferase [EC:2.1.1.63]	34	29	320	177	1839	178	13	1551	233	4	10	7	7	17	36
K14287	methionine aminotransferase [EC:2.6.1.-]	21	6	50	16	907	20	0	133	42	0	1	3	2	1	25
K00140	malonate-semialdehyde dehydrogenase (acetylating) / methylmalonate-semialdehyde dehydrogenase [EC:1.2.1.18 1.2.1.27];methylmalonate-semialdehyde dehydrogenase [EC:1.2.1.27]	566	269	585	305	12231	351	5682	2680	8017	109	195	137	214	215	4236
K05501	TetR/AcrR family transcriptional regulator	59	56	45	103	6	11	78	1322	165	112	23	150	49	52	50
K01903	succinyl-CoA synthetase beta subunit [EC:6.2.1.5]	5101	6016	4118	7047	8994	3734	6504	3809	6487	2713	4888	195	6742	2900	4737
K01902	succinyl-CoA synthetase alpha subunit [EC:6.2.1.5]	5101	6017	4118	7047	8994	3734	6504	3809	6487	2713	4888	195	6742	2900	4737
K01905	acetyl-CoA synthetase (ADP-forming) [EC:6.2.1.13]	2	2	7	11	10	0	2	7	2	2	6	2	0	6	3
K01904	4-coumarate--CoA ligase [EC:6.2.1.12]	1	0	3	4	2	2	0	20	4	1	0	0	0	0	0
K01907	acetoacetyl-CoA synthetase [EC:6.2.1.16]	14	16	155	87	991	97	13	724	118	3	7	4	5	11	8
K01906	6-carboxyhexanoate--CoA ligase [EC:6.2.1.14]	21	34	40	12	16	26	3	251	20	80	92	72	142	134	208
K01909	long-chain-fatty-acid--[acyl-carrier-protein] ligase [EC:6.2.1.20]	0	0	1	0	0	0	0	2	0	0	0	0	0	0	0
K01908	propionyl-CoA synthetase [EC:6.2.1.17]	217	17	188	98	3948	113	2819	799	3728	3	9	5	8	12	27
K14534	4-hydroxybutyryl-CoA dehydratase / vinylacetyl-CoA-Delta-isomerase [EC:4.2.1.120 5.3.3.3]	1873	2204	3327	1352	314	1029	559	5136	811	1429	1225	7095	999	3598	1234
K00147	glutamate-5-semialdehyde dehydrogenase [EC:1.2.1.41]	8976	8385	12537	8877	10328	11479	7122	10222	10104	5821	8622	8465	9664	8158	5811
K07769	two-component system, OmpR family, sensor histidine kinase NblS [EC:2.7.13.3]	959	11	717	2	0	90	0	10	84	2	0	1	1	2	0
K07768	two-component system, OmpR family, sensor histidine kinase SenX3 [EC:2.7.13.3]	4330	4396	3601	6893	3815	3516	3673	831	2640	2684	4827	138	6401	2840	1259
K06203	CysZ protein	45	55	181	101	994	94	7	959	272	77	98	74	142	138	214
K06202	CyaY protein	64	56	51	103	906	14	78	1336	202	112	23	151	50	53	51
K09921	hypothetical protein	21	5	47	13	907	18	1	102	202	0	0	3	2	1	3
K09920	hypothetical protein	18	2	26	3	901	6	0	13	197	0	0	3	1	1	1
K09927	hypothetical protein	51	44	228	38	841	210	7	282	266	47	59	73	54	45	62
K09024	putative flavin reductase RutF [EC:1.5.1.-]	17	5	52	17	313	21	13	118	25	1	2	3	0	2	53
K09022	UPF0076 protein YjgF	156	124	209	95	20	65	6	261	48	147	90	182	140	70	218
K09023	protein RutD	16	4	43	12	13	14	1	79	8	3	2	5	4	8	26
K09020	putative isochorismatase family protein RutB [EC:3.-.-.-]	11	10	52	19	16	22	1	128	10	2	4	5	3	3	27
K09021	UPF0076 protein RutC	11	4	42	12	11	14	0	80	8	1	1	3	0	0	25
K02908	large subunit ribosomal protein L30e	0	0	0	0	0	1	0	0	0	0	0	0	2	0	0
K02909	large subunit ribosomal protein L31	9844	10224	15215	12057	11938	15439	8734	12642	11975	7827	11152	9718	12128	10614	9513
K08218	MFS transporter, PAT family, beta-lactamase induction signal transducer AmpG	2809	4673	1484	193	5158	444	2918	6368	4008	1081	305	1556	976	695	3096
K08219	MFS transporter, UMF2 family, putative MFS family transporter protein	11	1	22	3	1	3	0	1	1	0	0	2	0	0	1
K02904	large subunit ribosomal protein L29	9785	9997	14906	11851	11118	15153	8488	12529	11760	7768	10983	9696	12060	10459	9405
K02906	large subunit ribosomal protein L3	9769	9977	14861	11839	11119	15134	8484	12453	11747	7772	10987	9686	12062	10458	9390
K02907	large subunit ribosomal protein L30	8667	9840	13186	10404	10737	14038	7489	11959	11280	6023	8886	9072	10137	8492	9075
K02902	large subunit ribosomal protein L28	9667	9834	14730	11785	11093	15075	8479	12220	11698	7572	10779	9310	11896	10278	9037
K00230	protoporphyrinogen oxidase [EC:1.3.3.4]	78	151	116	276	107	23	275	1407	505	138	74	196	88	100	130
K00231	protoporphyrinogen oxidase [EC:1.3.3.4]	1469	1590	965	33	25	235	20	1638	186	66	61	112	91	78	976
K00232	acyl-CoA oxidase [EC:1.3.3.6]	9	6	29	17	54	34	13	41	25	3	4	1	2	4	5
K08976	putative membrane protein	7	5	17	12	7	12	2	100	6	2	2	2	5	9	510
K00239	succinate dehydrogenase flavoprotein subunit [EC:1.3.99.1]	7034	7217	5784	7410	9356	5708	6630	6099	7236	4043	5746	2375	8066	4388	5624
K06209	chorismate mutase [EC:5.4.99.5]	1914	2050	4102	2759	1125	3784	1474	5135	1663	3629	5184	7283	3890	5858	3807
K09928	hypothetical protein	983	38	896	121	999	184	14	827	363	8	42	11	29	38	92
K01014	aryl sulfotransferase [EC:2.8.2.1]	1	0	1	0	0	0	0	3	0	0	0	0	0	0	0
K01012	biotin synthetase [EC:2.8.1.6]	4003	3594	5591	3562	6622	3638	4534	12079	5571	5852	7814	11245	6492	8126	9054
K01011	thiosulfate/3-mercaptopyruvate sulfurtransferase [EC:2.8.1.1 2.8.1.2];3-mercaptopyruvate sulfurtransferase [EC:2.8.1.2]	3487	682	3578	1385	3826	1564	656	5698	1488	783	821	2131	1119	1410	5085
K14103	energy-converting hydrogenase A subunit L	0	0	0	0	0	1	0	0	0	0	0	0	2	0	0
K14102	energy-converting hydrogenase A subunit K	0	0	0	0	0	1	0	0	0	0	0	0	2	0	0
K14101	energy-converting hydrogenase A subunit J	0	0	0	0	0	1	0	0	0	0	0	0	2	0	0
K14100	energy-converting hydrogenase A subunit I	0	0	0	0	0	1	0	0	0	0	0	0	2	0	0
K14105	energy-converting hydrogenase A subunit N	0	0	0	0	0	1	0	0	0	0	0	0	2	0	0
K14104	energy-converting hydrogenase A subunit M	0	0	0	0	0	1	0	0	0	0	0	0	2	0	0
K14109	energy-converting hydrogenase A subunit R	0	0	0	0	0	1	0	0	0	0	0	0	2	0	0
K14108	energy-converting hydrogenase A subunit Q	0	0	0	0	0	1	0	0	0	0	0	0	2	0	0
K06401	stage IV sporulation protein FA	0	0	1	2	0	0	0	0	1	0	0	0	0	0	7
K03503	DNA polymerase V [EC:3.4.21.-]	1268	359	1156	145	816	558	29	1234	559	862	204	1206	506	543	153
K03502	DNA polymerase V	8833	8441	14550	12944	6633	14916	6546	9693	8069	8709	12421	7722	12664	11268	6330
K03501	glucose inhibited division protein B [EC:2.1.-.-];ribosomal RNA small subunit methyltransferase G [EC:2.1.1.170]	9744	10052	14923	12020	11207	15155	8682	12601	11776	7714	10952	9613	11869	10464	9401
K03500	ribosomal RNA small subunit methyltransferase B [EC:2.1.1.-]	4705	3839	10921	5046	7304	11234	4885	11528	9237	4201	5876	8251	4633	7051	8006
K02278	prepilin peptidase CpaA [EC:3.4.23.43]	494	384	647	279	1102	1527	92	2955	501	593	289	1424	500	685	358
K02279	pilus assembly protein CpaB	963	1758	5797	905	1520	5764	366	5543	2730	1442	1292	4831	1280	3135	1528
K02276	cytochrome c oxidase subunit III [EC:1.9.3.1]	1048	58	1067	199	1344	292	32	1318	426	16	48	16	317	39	586
K02277	cytochrome c oxidase subunit IV [EC:1.9.3.1]	0	1	1	2	0	1	1	1	1	0	0	0	0	0	506
K02274	cytochrome c oxidase subunit I [EC:1.9.3.1]	1055	66	1112	221	1081	325	40	1486	452	20	58	49	48	56	1028
K02275	cytochrome c oxidase subunit II [EC:1.9.3.1]	1053	64	1104	215	1076	315	36	1463	446	19	57	48	48	55	1027
K12508	feruloyl-CoA synthase [EC:6.2.1.34]	4	3	22	6	344	12	1	98	13	0	1	2	0	1	528
K12507	acyl-CoA synthetase [EC:6.2.1.-]	45	52	30	92	1	5	78	1262	1	115	24	153	51	54	49
K12506	2-C-methyl-D-erythritol 4-phosphate cytidylyltransferase / 2-C-methyl-D-erythritol 2,4-cyclodiphosphate synthase [EC:2.7.7.60 4.6.1.12]	529	1303	575	357	226	230	99	5394	214	419	378	758	610	307	509
K12500	thioesterase III [EC:3.1.2.-]	13	2	24	4	1	4	0	13	2	0	0	3	0	0	1
K12503	short-chain Z-isoprenyl diphosphate synthase [EC:2.5.1.68];short-chain Z-isoprenyl diphosphate synthetase [EC:2.5.1.68]	16	8	41	23	16	48	17	79	35	3	5	1	2	6	5
K09728	hypothetical protein	0	0	0	0	0	1	0	0	0	0	0	0	2	0	0
K14587	protein sgcE [EC:5.1.3.-]	0	5	1	0	0	0	0	2	0	2	2	2	3	2	1
K06597	chemosensory pili system protein ChpB (putative protein-glutamate methylesterase)	1	0	1	0	143	1	0	7	2	0	0	0	0	0	0
K06596	chemosensory pili system protein ChpA (sensor histidine kinase/response regulator)	1929	26	1458	14	1205	193	12	110	222	4	2	2	4	5	52
K06595	heam-based aerotactic trancducer	0	0	1	1	0	1	1	1	1	0	0	0	0	0	938
K06599	AraC family transcriptional regulator, chemosensory pili system protein ChpD	0	0	2	0	42	0	0	5	0	0	0	0	0	0	0
K06598	chemosensory pili system protein ChpC	6	1	5	1	900	4	0	13	36	0	0	0	1	1	0
K07978	GntR family transcriptional regulator	959	12	722	4	2	90	0	21	84	2	0	1	1	2	0
K07979	GntR family transcriptional regulator	8973	8775	16552	12400	6589	17779	5713	9644	9061	8208	13782	13296	12530	13246	11001
K14585	trans-o-hydroxybenzylidenepyruvate hydratase-aldolase [EC:4.1.2.45]	1	0	1	1	0	1	0	8	1	0	1	0	0	0	0
K10907	aminotransferase [EC:2.6.1.-]	6776	7235	8061	11630	4864	4365	6377	9671	2717	9061	12919	11500	13143	12366	5968
K10906	exodeoxyribonuclease VIII [EC:3.1.11.-]	10	1	0	1	1	0	0	0	0	0	0	0	0	0	0
K10908	DNA-directed RNA polymerase, mitochondrial [EC:2.7.7.6]	10	56	19	0	0	1	0	167	3	1	2	1	1	3	0
K09819	manganese/iron transport system permease protein	1297	1320	5994	142	768	6811	60	1425	3790	20	143	11	16	610	115
K09818	manganese/iron transport system substrate-binding protein	1102	955	4354	59	402	4601	28	1005	2079	12	100	6	7	514	106
K09817	zinc transport system ATP-binding protein [EC:3.6.3.-]	2186	3222	7482	1708	7018	7434	3688	8111	7037	3234	3912	8728	3412	5447	4484
K09816	zinc transport system permease protein	2186	3219	7482	1707	7018	7433	3688	8100	7036	3232	3911	8727	3411	5446	4052
K09815	zinc transport system substrate-binding protein	2294	4370	11348	1710	7596	12226	3802	9251	9182	3192	4056	8626	3348	6014	4509
K06374	spore maturation protein B	1513	1397	2881	1345	779	2329	604	3425	1075	1915	3218	6708	2001	3955	3162
K06373	spore maturation protein A	1229	1267	2706	1327	623	1165	611	3136	844	1915	3215	6720	2006	3939	3171
K09812	cell division transport system ATP-binding protein	8290	9528	13365	10278	6653	13308	5414	12097	7190	7675	10857	9439	11726	10349	8922
K09811	cell division transport system permease protein	8412	9670	14277	11718	7026	14284	6357	12595	7564	9438	12974	10084	13663	12321	9207
K09810	lipoprotein-releasing system ATP-binding protein [EC:3.6.3.-]	1085	1994	839	524	5401	770	2999	4665	4079	1418	756	2200	1716	1194	3682
K09724	hypothetical protein	0	0	0	0	0	1	0	0	0	0	0	0	2	0	0
K09721	hypothetical protein	0	0	0	0	0	1	0	0	0	0	0	0	2	0	0
K04058	type III secretion protein SctW	8	0	4	0	216	1	0	4	1	2	1	2	4	8	0
K04059	type III secretion protein SctX	1	0	1	0	0	1	0	1	1	0	0	0	0	0	0
K04050	type III secretion protein SctE	1	0	0	0	0	0	0	0	0	0	0	0	0	0	0
K04051	type III secretion protein SctG	1	0	0	0	0	0	0	0	0	0	0	0	0	0	0
K04052	type III secretion protein SctH	1	0	0	0	0	0	0	0	0	0	0	0	0	0	0
K04053	type III secretion protein SctI	1	0	0	0	0	0	0	0	0	0	0	0	0	0	0
K04054	type III secretion protein SctK	1	0	0	0	0	0	0	0	0	0	0	0	0	0	0
K04056	type III secretion protein SctO	6	0	3	0	2	1	0	1	1	2	1	2	4	8	0
K04057	type III secretion protein SctP	1	0	0	0	0	0	0	0	0	0	0	0	0	0	0
K10015	histidine transport system permease protein	17	2	26	4	803	6	0	5	35	0	0	3	0	1	1
K10014	histidine transport system substrate-binding protein	24	57	42	2	296	4	0	168	6	2	2	3	1	4	1
K10017	histidine transport system ATP-binding protein [EC:3.6.3.21]	18	4	43	13	812	15	1	78	41	1	1	3	0	2	2
K10016	histidine transport system permease protein	17	2	26	4	803	6	0	5	35	0	0	3	0	1	1
K10011	UDP-GlcUA decarboxylase/UDP-L-Ara4N formyltransferase [EC:1.1.1.- 2.1.2.-];UDP-4-amino-4-deoxy-L-arabinose formyltransferase / UDP-glucuronic acid dehydrogenase (UDP-4-keto-hexauronic acid decarboxylating) [EC:2.1.2.13 1.1.1.305]	39	19	50	6	1538	10	0	34	69	0	1	5	1	2	3
K10010	cystine transport system ATP-binding protein [EC:3.6.3.-]	607	1316	4295	180	1491	6268	26	1775	2419	460	601	780	700	995	778
K10013	lysine/arginine/ornithine transport system substrate-binding protein	28	3	26	5	801	6	0	6	35	0	0	3	0	1	1
K10012	undecaprenyl-phosphate 4-deoxy-4-formamido-L-arabinose transferase [EC:2.7.8.-];undecaprenyl-phosphate 4-deoxy-4-formamido-L-arabinose transferase [EC:2.7.8.30]	658	1732	7622	386	1732	10606	90	2312	4158	277	508	605	477	1146	445
K10019	octopine/nopaline transport system permease protein	3	10	110	70	76	66	5	647	60	1	3	1	2	7	4
K10018	octopine/nopaline transport system substrate-binding protein	3	10	105	67	74	66	5	630	61	1	3	1	2	6	4
K13665	pyruvyltransferase	8	1	31	2	0	24	0	2	17	2	2	6	2	8	3
K13663	acyltransferase [EC:2.3.1.-]	0	0	0	0	0	0	0	1	0	0	0	0	0	0	0
K13662	putative polymerase	0	0	0	0	0	0	0	2	0	0	0	0	0	0	0
K13660	beta-1,4-glucosyltransferase [EC:2.4.1.-]	0	0	0	0	0	0	0	1	0	0	0	0	0	0	0
K13669	alpha-1,2-mannosyltransferase [EC:2.4.1.-]	0	0	2	0	0	1	0	2	0	0	0	0	0	0	0
K13668	phosphatidylinositol alpha-1,6-mannosyltransferase [EC:2.4.1.-]	8	2	19	9	5	20	7	16	8	0	1	0	0	1	1
K07641	two-component system, OmpR family, sensor histidine kinase CreC [EC:2.7.13.3]	122	3	36	6	4300	10	1317	39	3176	3	2	5	6	8	46
K01466	allantoinase [EC:3.5.2.5]	66	73	174	122	26	83	90	1354	74	216	157	242	154	172	195
K13590	diguanylate cyclase	969	21	798	45	1433	135	2	318	475	2	5	2	4	5	6
K01464	dihydropyrimidinase [EC:3.5.2.2]	1419	2476	6570	1092	1662	6046	425	4956	2920	1384	2944	5182	1424	3775	3157
K01465	dihydroorotase [EC:3.5.2.3]	10351	9763	14905	10904	16583	14250	10963	13197	14793	7750	11023	9509	12134	10588	6314
K01462	peptide deformylase [EC:3.5.1.88]	22745	22211	32562	30011	21369	33101	17517	22492	22389	16579	25904	16316	28667	22128	16574
K01463	None	685	539	1851	771	1146	679	277	3406	612	668	649	3144	453	1716	1179
K01460	glutathionylspermidine amidase/synthetase [EC:3.5.1.78 6.3.1.8]	23	2	43	5	2	6	0	0	1	0	0	5	0	0	2
K01461	N-acyl-D-glutamate deacylase [EC:3.5.1.82]	3	0	10	3	254	4	0	26	34	0	0	0	0	0	0
K13599	two-component system, NtrC family, nitrogen regulation response regulator NtrX	66	56	210	99	104	103	9	972	84	81	111	78	149	156	223
K13598	two-component system, NtrC family, nitrogen regulation sensor histidine kinase NtrY [EC:2.7.13.3]	47	20	192	90	100	97	7	815	78	3	8	5	6	10	7
K01468	imidazolonepropionase [EC:3.5.2.7]	350	251	416	536	5340	509	3095	1258	3981	94	142	385	405	249	641
K01469	5-oxoprolinase (ATP-hydrolysing) [EC:3.5.2.9]	969	22	854	84	86	167	6	744	150	4	7	4	9	17	6
K09251	putrescine aminotransferase [EC:2.6.1.82]	34	27	74	18	6	27	4	129	17	23	33	42	36	29	81
K09252	feruloyl esterase [EC:3.1.1.73]	2	4	26	13	113	19	0	138	16	0	1	1	1	0	24
K02041	phosphonate transport system ATP-binding protein	1537	1189	2494	1674	1176	3039	744	2478	1548	161	239	261	205	219	653
K02040	phosphate transport system substrate-binding protein	14629	9522	15953	13405	12388	11689	9617	12154	10591	9666	13193	10470	14190	12092	7540
K02043	GntR family transcriptional regulator, phosphonate transport system regulatory protein	14	14	163	87	233	82	6	768	75	1	4	4	3	7	8
K02045	sulfate transport system ATP-binding protein [EC:3.6.3.25]	1628	764	1304	344	5180	382	2911	3474	3945	353	221	454	313	284	945
K02044	phosphonate transport system substrate-binding protein	3686	1594	4752	2679	1385	5072	838	3073	2722	195	342	336	350	277	1156
K02047	sulfate transport system permease protein	1633	773	1405	407	5255	443	2916	4085	4004	356	225	457	319	298	945
K02046	sulfate transport system permease protein	1634	773	1405	407	5255	443	2916	4085	4004	356	225	457	319	298	945
K02049	sulfonate/nitrate/taurine transport system ATP-binding protein	13006	10202	20815	13792	17270	17769	10116	23841	12976	11129	16378	17033	15480	16624	10474
K02048	sulfate transport system substrate-binding protein	1876	856	1459	420	10171	459	5731	4539	7533	359	229	460	323	302	1041
K05549	benzoate 1,2-dioxygenase alpha subunit [EC:1.14.12.10]	13	2	13	6	847	10	17	18	52	0	1	0	1	1	50
K05548	MFS transporter, AAHS family, benzoate transport protein	17	13	123	77	674	83	26	657	85	1	4	2	3	7	100
K06046	long-chain-fatty-acid---luciferin-component ligase [EC:6.2.1.19]	7	1	0	0	212	0	0	2	0	0	0	0	0	0	0
K03319	divalent anion:Na+ symporter, DASS family	2838	1418	3748	2917	4747	4460	3149	2678	6202	178	204	240	371	120	1369
K03316	monovalent cation:H+ antiporter, CPA1 family	6345	4719	5315	7980	10295	4925	6619	2171	7079	2739	4861	199	6597	2892	1587
K03317	concentrative nucleoside transporter, CNT family	1108	118	1014	496	75	284	101	347	385	38	63	177	72	95	209
K03314	Na+:H+ antiporter, NhaB family	24	18	25	4	758	5	1	29	195	1	3	3	3	1	15
K03315	Na+:H+ antiporter, NhaC family	3193	2769	8512	4354	9719	8559	7356	5843	11306	4380	4043	8358	4024	6528	3755
K03312	glutamate:Na+ symporter, ESS family	2595	1756	3401	1339	4859	1061	3501	5951	4542	1496	1500	5320	1191	3029	2422
K03313	Na+:H+ antiporter, NhaA family	5181	6235	8336	7263	9671	9230	6538	5137	8877	2877	5134	466	7007	3674	4452
K03310	alanine or glycine:cation symporter, AGCS family	6899	7193	11447	6500	12196	8934	8586	20092	11744	7696	11763	21938	8239	14387	11037
K03311	branched-chain amino acid:cation transporter, LIVCS family	7955	8372	12180	9836	9361	13318	5653	8889	10343	4032	7333	5587	7760	6252	5213
K02945	small subunit ribosomal protein S1	9820	8901	13375	9644	10451	13883	7235	9368	11099	4977	8043	4686	9226	6287	7951
K06162	PhnM protein	54	86	394	418	516	489	83	1510	298	24	68	241	27	154	37
K06163	PhnJ protein	17	16	167	96	244	82	8	769	76	1	6	6	3	10	9
K06160	putative ATP-binding cassette transporter	964	13	726	6	803	97	1	35	119	3	1	1	1	3	1
K06166	PhnG protein	17	16	166	96	244	82	8	769	76	1	6	5	3	9	9
K00359	NADH oxidase [EC:1.6.-.-]	312	370	687	414	272	629	190	858	367	638	449	2332	585	1101	1016
K06164	PhnI protein	17	16	167	96	244	82	8	769	76	1	6	6	3	10	9
K06165	PhnH protein	17	16	167	96	244	82	8	769	76	1	6	6	3	10	9
K06168	bifunctional enzyme involved in thiolation and methylation of tRNA	8560	9646	13306	10429	10880	13119	8292	12298	10622	7638	10800	9449	11769	10362	8532
K06169	tRNA-(ms[2]io[6]A)-hydroxylase [EC:1.-.-.-]	1189	19	738	16	5055	110	2815	121	3774	10	1	4	291	3	84
K13020	UDP-D-GlcNAcA oxidase [EC:1.1.1.-]	29	44	28	9	4	29	0	113	19	24	32	43	46	33	19
K07158	None	0	0	0	0	0	1	0	0	0	0	0	0	2	0	0
K07159	None	0	0	0	0	0	1	0	0	0	0	0	0	2	0	0
K04835	methylaspartate ammonia-lyase [EC:4.3.1.2]	21	85	76	178	94	17	196	143	22	12	36	26	8	44	21
K11991	tRNA-specific adenosine deaminase [EC:3.5.4.-]	19	16	26	6	1	5	0	44	161	0	1	2	2	0	2
K11622	lia operon protein LiaF	0	0	5	3	0	3	2	1	2	0	0	0	0	0	510
K11996	adenylyltransferase and sulfurtransferase;adenylyltransferase and sulfurtransferase MOCS3/UBA4 [EC:2.7.7.- 2.8.1.-]	1263	71	867	474	5087	182	2853	375	3830	97	133	105	188	174	3563
K11626	putative sodium/glutamine symporter	0	0	1	0	0	0	0	1	0	0	0	0	0	0	0
K11629	two-component system, OmpR family, bacitracin resistance sensor histidine kinase BceS [EC:2.7.13.3]	0	0	3	2	0	2	1	3	1	0	0	0	0	0	436
K11628	mycocerosic acid synthase [EC:2.3.1.111]	0	0	0	0	0	0	0	1	0	0	0	0	0	0	0
K07561	diphthamide synthase subunit DPH2	0	0	0	0	0	1	0	0	0	0	0	0	2	0	0
K07560	D-tyrosyl-tRNA(Tyr) deacylase [EC:3.1.-.-]	9628	9867	14548	11690	10969	14976	8471	11394	11615	7630	10884	9435	11815	10377	9314
K07562	nonsense-mediated mRNA decay protein 3	0	0	0	0	0	1	0	0	0	0	0	0	2	0	0
K07567	TdcF protein	9059	11262	17416	11818	15869	17555	12244	14922	16179	9681	13241	10399	13915	13025	9389
K07566	tRNA threonylcarbamoyladenosine biosynthesis protein;putative translation factor	6532	4931	8876	3580	11906	8111	6850	10356	12041	4084	4085	9871	4479	5723	10633
K07569	RNA-binding protein	0	0	0	0	0	1	0	0	0	0	0	0	2	0	0
K07568	S-adenosylmethionine:tRNA ribosyltransferase-isomerase [EC:5.-.-.-]	4599	6627	8735	2055	6609	8360	3727	12050	7484	4159	4127	10046	4434	6168	7281
K09925	hypothetical protein	10	62	11	1	4	2	0	372	4	1	3	1	1	2	2
K11192	PTS system, N-acetylmuramic acid-specific IIC component	9	1	22	2	0	3	0	0	1	0	0	2	0	0	1
K11196	PTS system, fructose-specific IIC component	6	1	0	0	0	0	0	0	0	0	0	0	0	0	0
K11195	PTS system, fructose-specific IIB component [EC:2.7.1.69]	6	1	0	0	0	0	0	0	0	0	0	0	0	0	0
K02492	glutamyl-tRNA reductase [EC:1.2.1.70]	2201	1363	2059	671	5520	2249	3059	4331	4503	924	698	2822	1196	1412	4315
K10713	formaldehyde-activating enzyme [EC:4.3.-.-]	2	2	16	13	220	8	1	74	6	0	0	0	1	1	1
K10710	fructoselysine 6-kinase [EC:2.7.1.-]	38	81	124	261	195	339	67	115	163	144	256	486	139	282	348
K10711	GntR family transcriptional regulator, frlABCD operon transcriptional regulator	92	129	644	1434	359	324	997	392	158	1748	2093	606	1909	1944	302
K10716	voltage-gated potassium channel	2	0	23	2	0	3	0	0	0	0	0	2	0	0	1
K02490	two-component system, response regulator, stage 0 sporulation protein F	1	3	1	2	0	1	2	4	1	2	5	1	6	1	533
K10714	methylene-tetrahydromethanopterin dehydrogenase [EC:1.5.1.-]	1	2	17	12	7	8	0	71	6	0	0	0	1	0	1
K10715	two-component system, sensor histidine kinase [EC:2.7.13.3];two-component system, sensor histidine kinase RpfC [EC:2.7.13.3]	0	0	3	3	2	2	0	15	3	0	0	0	0	0	0
K01929	UDP-N-acetylmuramoylalanyl-D-glutamyl-2,6-diaminopimelate--D-alanyl- D-alanine ligase [EC:6.3.2.10];UDP-N-acetylmuramoylalanyl-D-glutamyl-2,6-diaminopimelate--D-alanyl-D-alanine ligase [EC:6.3.2.10]	9790	9987	14893	11849	11120	15143	8487	12422	11754	7775	10991	9696	12059	10470	9395
K01928	UDP-N-acetylmuramoylalanyl-D-glutamate--2,6-diaminopimelate ligase [EC:6.3.2.13]	11084	10451	16883	14010	11626	18007	8918	12718	13176	7755	11005	9644	12183	10550	9750
K01923	phosphoribosylaminoimidazole-succinocarboxamide synthase [EC:6.3.2.6]	8630	9633	13562	10746	10874	13422	8208	12516	10754	7700	10849	9516	11919	10383	9168
K01922	phosphopantothenate-cysteine ligase [EC:6.3.2.5]	10	5	10	17	5	3	22	18	2	40	30	22	136	25	64
K01921	D-alanine-D-alanine ligase [EC:6.3.2.4]	10576	10664	16600	12550	11862	15738	8792	14333	12235	8531	11608	13533	12567	12391	10421
K01920	glutathione synthase [EC:6.3.2.3]	1197	48	933	114	5259	210	2822	1001	4006	6	10	9	10	14	79
K01926	AT-rich DNA-binding protein	3247	2695	5715	4635	1674	5799	2125	5412	2792	4567	5614	8761	4790	6586	4471
K01925	UDP-N-acetylmuramoylalanine--D-glutamate ligase [EC:6.3.2.9]	9868	10084	15014	11885	11138	15201	8487	12714	11796	7841	11021	9770	12088	10518	9421
K01924	UDP-N-acetylmuramate--alanine ligase [EC:6.3.2.8]	9799	10021	14911	11858	11125	15158	8486	12670	11763	7845	11084	9748	12194	10588	9600
K07789	RND superfamily, multidrug transport protein MdtC	37	59	62	13	1125	16	1	236	44	4	4	5	6	12	3
K07788	RND superfamily, multidrug transport protein MdtB	32	59	61	13	1122	16	1	240	45	2	3	3	2	4	26
K07785	MFS transporter, NRE family, putaive nickel resistance protein	964	11	726	6	301	93	12	60	99	2	1	1	1	3	28
K07784	MFS transporter, OPA family, hexose phosphate transport protein UhpT	35	22	69	13	2	23	4	79	13	5	8	23	3	12	17
K07787	Cu(I)/Ag(I) efflux system membrane protein CusA	116	138	96	119	416	48	79	1502	196	184	78	279	433	123	95
K07786	MFS transporter, multidrug resistance protein Y	1	0	21	0	0	3	0	0	0	0	0	2	0	0	1
K07781	LuxR family transcriptional regulator, capsular biosynthesis positive transcription factor	11	1	22	2	1	3	0	0	1	0	0	2	0	0	1
K07783	MFS transporter, OPA family, sugar phosphate sensor protein UhpC	34	14	26	4	1	6	0	18	144	11	2	23	12	8	4
K07782	LuxR family transcriptional regulator	31	18	179	91	1186	91	8	825	111	2	6	4	4	9	8
K05835	threonine efflux protein	31	4	38	10	1100	16	15	53	50	1	0	3	0	2	75
K14661	nodulation protein F [EC:2.3.1.-]	0	2	14	8	6	6	0	54	2	0	0	0	0	0	0
K09844	hydroxyneurosporene dehydrogenase	0	1	9	4	6	4	0	29	5	0	0	0	0	0	1
K00782	hypothetical protein	728	2139	413	76	789	189	14	2937	461	67	67	117	96	78	3275
K00783	hypothetical protein	8487	8900	9957	11854	10666	9555	8643	10722	9303	7691	10829	9592	11848	9895	9346
K00784	ribonuclease Z [EC:3.1.26.11]	4429	3690	4528	2460	5384	5538	3536	5094	5776	2000	2953	3342	2619	2472	6338
K00785	beta-galactosamide-alpha-2,3-sialyltransferase [EC:2.4.99.-]	0	0	1	0	0	0	0	3	0	0	0	0	0	0	0
K00786	None	738	615	1540	1677	667	1818	1025	1577	620	2359	3953	1592	2873	2708	1767
K00039	ribitol 2-dehydrogenase [EC:1.1.1.56]	8	12	123	75	84	74	6	707	69	1	3	1	2	7	4
K00036	glucose-6-phosphate 1-dehydrogenase [EC:1.1.1.49]	6768	5126	6999	8739	6170	7148	4061	3079	4763	2815	5067	344	6664	3066	1938
K00037	3-alpha-hydroxysteroid dehydrogenase [EC:1.1.1.50]	0	1	3	2	42	2	0	2	0	0	0	0	0	1	1
K00034	glucose 1-dehydrogenase [EC:1.1.1.47]	968	31	805	27	522	153	56	188	152	15	36	21	27	36	160
K00035	D-galactose 1-dehydrogenase [EC:1.1.1.48]	3	13	134	83	301	81	6	749	73	1	5	2	3	8	5
K00032	phosphogluconate 2-dehydrogenase [EC:1.1.1.43]	5	1	3	0	604	2	0	3	34	0	0	0	0	0	0
K00033	6-phosphogluconate dehydrogenase [EC:1.1.1.44]	7118	6601	10982	8801	5617	12211	4121	4922	6846	2822	5178	350	6666	3615	2545
K00030	isocitrate dehydrogenase (NAD+) [EC:1.1.1.41]	1370	867	1625	1930	705	709	1078	2097	566	1833	2253	1035	2065	2221	511
K00031	isocitrate dehydrogenase [EC:1.1.1.42]	7790	7493	11140	8484	14968	10707	9753	7286	13308	5568	8458	7513	9574	7675	8309
K01259	proline iminopeptidase [EC:3.4.11.5]	5075	1608	8665	3245	5622	7912	2527	4592	7261	1975	2404	879	2254	2696	1549
K01258	tripeptide aminopeptidase [EC:3.4.11.4]	5352	6482	15464	7218	2963	17398	3139	12398	8064	6265	7830	8467	6770	9284	8058
K01255	leucyl aminopeptidase [EC:3.4.11.1]	1852	1092	2544	2278	5961	1269	4176	3876	4759	2048	2457	1808	2233	2632	1333
K01256	aminopeptidase N [EC:3.4.11.2]	6960	5023	6427	8610	9318	6190	6715	3940	8034	2880	4960	377	7018	2981	4648
K01251	adenosylhomocysteinase [EC:3.3.1.1]	1746	1084	1387	308	5235	597	2940	4567	3901	1711	877	2962	1799	1526	1388
K01250	pyrimidine-specific ribonucleoside hydrolase [EC:3.2.-.-]	88	108	166	445	63	141	20	391	251	435	222	1203	474	552	350
K01253	microsomal epoxide hydrolase [EC:3.3.2.9]	7	11	13	5	9	12	1	87	8	66	64	112	193	26	16
K01252	enterobactin isochorismatase [EC:3.3.2.1]	14	3	42	8	302	14	0	53	12	1	1	3	0	1	25
K09008	hypothetical protein	5	16	162	96	100	95	7	850	80	3	6	2	4	8	8
K09009	hypothetical protein	4331	4398	3609	6893	3817	3519	3673	841	2641	2686	4827	138	6401	2842	1261
K09000	hypothetical protein	972	34	770	16	6	100	4	33	89	9	9	26	12	16	4
K09001	anhydro-N-acetylmuramic acid kinase [EC:2.7.1.-];anhydro-N-acetylmuramic acid kinase [EC:2.7.1.170]	1281	198	1069	399	5259	284	3154	2478	3910	130	69	202	65	117	235
K09002	hypothetical protein	440	879	1050	1518	417	627	1004	2223	309	2326	2471	1965	2536	2677	850
K09003	hypothetical protein	8	14	19	13	12	15	1	128	6	68	65	111	194	26	16
K09004	hypothetical protein	46	110	178	62	27	70	7	512	43	29	43	65	45	39	87
K09005	hypothetical protein	1138	1047	4842	172	625	5248	32	2042	2300	110	238	186	308	629	2953
K09006	hypothetical protein	0	1	0	0	3	0	0	0	0	1	0	0	0	0	0
K09007	hypothetical protein	91	198	80	104	815	19	82	2042	53	129	37	188	78	73	73
K09846	hydroxyneurosporene methyltransferase [EC:2.1.1.-]	0	1	8	5	6	4	1	29	5	0	0	0	0	0	1
K08234	glyoxylase I family protein	1581	512	2216	1637	645	2026	1090	1397	852	2247	3977	1506	2765	2620	4880
K00258	None	1	2	10	9	3	9	0	69	3	0	0	0	0	0	0
K00259	alanine dehydrogenase [EC:1.4.1.1]	1098	281	1242	601	408	639	344	1253	576	142	205	450	464	293	3541
K00252	glutaryl-CoA dehydrogenase [EC:1.3.99.7]	254	35	257	145	5178	194	2909	1035	3674	16	16	7	299	19	2967
K00253	isovaleryl-CoA dehydrogenase [EC:1.3.99.10]	222	20	179	101	5402	111	2821	917	3803	2	6	3	5	9	76
K00256	isoquinoline 1-oxidoreductase [EC:1.3.99.16]	3	1	20	5	305	11	0	92	14	0	0	0	0	1	0
K00257	None	1831	2338	963	359	22050	605	11347	5247	15201	1449	649	2632	1523	1360	5573
K00254	dihydroorotate dehydrogenase [EC:1.3.5.2]	0	0	0	0	0	1	0	1	0	0	0	0	0	0	0
K00255	long-chain-acyl-CoA dehydrogenase [EC:1.3.99.13]	210	3	13	8	4157	21	2815	52	3496	1	1	1	0	4	93
K01079	phosphoserine phosphatase [EC:3.1.3.3]	5892	5330	4715	7130	8979	3830	6614	4172	6568	2874	4913	420	6636	2970	1437
K01078	acid phosphatase [EC:3.1.3.2]	7	9	23	17	54	20	0	179	8	3	2	3	5	8	2
K01071	oleoyl-[acyl-carrier-protein] hydrolase [EC:3.1.2.14]	1212	377	1542	1391	478	1987	178	270	1130	47	65	36	221	27	502
K01070	S-formylglutathione hydrolase [EC:3.1.2.12]	1192	30	905	101	5149	197	2877	881	3850	4	7	6	5	11	214
K01073	acyl-CoA hydrolase [EC:3.1.2.20]	37	61	160	259	198	372	69	125	183	22	58	234	21	138	27
K01077	alkaline phosphatase [EC:3.1.3.1]	1195	1413	1977	995	384	1116	428	4442	1145	1793	1021	4972	1613	2501	1440
K01076	None	477	146	155	39	9245	136	5636	915	7104	422	245	1173	454	576	500
K14470	mesaconyl-CoA C1-C4 CoA transferase	1	0	4	3	2	4	3	5	2	0	1	0	0	1	0
K14475	inhibitor of cysteine peptidase	23	26	24	3	902	20	3	18	47	36	38	59	94	41	90
K02788	PTS system, lactose-specific IIC component	715	452	1985	2535	693	2030	1104	746	1070	1785	2181	625	2114	2034	727
K02782	PTS system, glucitol/sorbitol-specific IIB component [EC:2.7.1.69]	14	33	195	88	84	102	10	629	85	5	12	26	9	14	9
K02783	PTS system, glucitol/sorbitol-specific IIC component	385	481	1409	412	258	1192	155	1983	554	226	234	1253	157	500	307
K02781	PTS system, glucitol/sorbitol-specific IIA component [EC:2.7.1.69]	701	302	933	228	127	899	90	947	401	95	127	306	101	131	190
K02786	PTS system, lactose-specific IIA component [EC:2.7.1.69]	702	412	1675	2532	671	1471	1103	648	931	1784	2163	624	2113	1990	721
K02787	PTS system, lactose-specific IIB component [EC:2.7.1.69]	0	0	0	0	0	1	0	1	0	0	0	0	0	0	0
K02784	phosphocarrier protein HPr	28	38	74	16	2	12	3	43	165	4	8	25	7	6	5
K01060	cephalosporin-C deacetylase [EC:3.1.1.41]	93	102	194	73	43	138	94	555	99	450	249	1218	557	586	418
K01787	N-acylglucosamine 2-epimerase [EC:5.1.3.8]	498	1533	187	1	6	95	2	1411	61	119	107	190	267	95	2837
K01786	L-ribulose-5-phosphate 4-epimerase [EC:5.1.3.4]	5073	5933	9077	7792	4536	10058	3909	3010	5612	3648	7352	2513	7675	5080	3671
K01785	aldose 1-epimerase [EC:5.1.3.3]	4183	5535	9803	4453	2470	10111	1909	8956	5072	5751	6117	10220	5712	7747	7332
K01784	UDP-glucose 4-epimerase [EC:5.1.3.2]	13961	13564	21371	14788	17961	20176	12636	19810	18814	10561	13918	13000	15519	13907	14168
K01783	ribulose-phosphate 3-epimerase [EC:5.1.3.1]	10637	11293	19605	12228	11718	21258	8530	14581	14370	7957	11348	10046	12277	11247	9739
K01782	3-hydroxyacyl-CoA dehydrogenase / enoyl-CoA hydratase / 3-hydroxybutyryl-CoA epimerase [EC:1.1.1.35 4.2.1.17 5.1.2.3]	739	105	603	320	14814	324	8479	2648	11310	96	151	128	191	196	504
K01781	mandelate racemase [EC:5.1.2.2]	1	0	7	2	4	4	0	28	3	2	0	2	2	1	0
K01780	None	0	2	17	9	8	10	1	69	6	1	0	0	0	0	1
K01789	UDP-glucuronate 5'-epimerase [EC:5.1.3.12]	0	2	17	9	7	8	1	53	149	1	1	1	0	0	1
K01788	N-acylglucosamine-6-phosphate 2-epimerase [EC:5.1.3.9]	2793	2493	9422	4281	1922	9525	2698	5146	4043	4780	6958	6075	5195	7572	3065
K02526	2-keto-3-deoxygluconate permease	289	1450	7205	96	573	8861	26	1672	3682	120	288	133	120	815	218
K02527	3-deoxy-D-manno-octulosonic-acid transferase [EC:2.-.-.-]	1146	2270	559	269	5179	237	2927	4819	3863	1126	411	1559	1096	820	3342
K02525	LacI family transcriptional regulator, kdg operon repressor	90	30	134	820	841	157	34	111	113	11	10	27	34	15	89
K02250	competence protein ComK	0	0	4	3	1	3	1	3	1	0	0	0	0	0	942
K02523	octaprenyl-diphosphate synthase [EC:2.5.1.-];octaprenyl-diphosphate synthase [EC:2.5.1.90];octaprenyl diphosphate synthase [EC:2.5.1.-]	1008	1860	541	244	5179	239	2930	4224	3861	1208	486	1711	1311	861	3376
K02520	translation initiation factor IF-3	9759	9965	14858	11840	10613	15132	8484	12436	11744	7639	10828	9417	11836	10379	9167
K02521	LysR family transcriptional regulator, positive regulator for ilvC	18	16	23	3	2	3	0	25	161	0	1	2	0	0	2
K02258	cytochrome c oxidase assembly protein subunit 11;cytochrome c oxidase subunit XI assembly protein	54	20	209	97	1000	107	7	879	278	2	8	4	8	11	9
K02259	cytochrome c oxidase assembly protein subunit 15;cytochrome c oxidase subunit XV assembly protein	1037	44	987	138	1023	257	26	1043	402	9	15	10	16	27	519
K02528	16S rRNA (adenine1518-N6/adenine1519-N6)-dimethyltransferase [EC:2.1.1.182];dimethyladenosine transferase [EC:2.1.1.-]	9794	10000	14925	11851	11121	15164	8489	12526	11767	7766	10988	9697	12063	10468	9409
K02529	LacI family transcriptional regulator	34990	33839	48192	48886	25161	49052	21784	39388	29033	27439	43812	34803	45567	37517	27329
K03781	catalase [EC:1.11.1.6]	652	283	549	232	10676	443	5693	2063	7490	994	342	1379	1024	581	2749
K03780	L(+)-tartrate dehydratase beta subunit [EC:4.2.1.32]	200	217	256	194	22	150	84	1686	78	284	167	387	208	184	259
K03783	purine-nucleoside phosphorylase [EC:2.4.2.1]	2437	4169	7630	1574	1267	8365	749	6833	3606	2909	3617	7824	3112	5214	6288
K03782	catalase/peroxidase [EC:1.11.1.6 1.11.1.7]	1043	68	950	126	1503	199	19	744	825	99	144	167	475	190	371
K03785	3-dehydroquinate dehydratase I [EC:4.2.1.10]	2413	2128	4718	3883	1398	4664	1668	7196	2266	3281	4773	5247	3515	4768	3141
K03784	purine-nucleoside phosphorylase [EC:2.4.2.1]	2021	3058	8253	4520	2020	8789	2768	6232	3918	4856	5836	6727	5310	7568	2914
K03787	5'-nucleotidase [EC:3.1.3.5]	2120	2695	1845	780	1961	970	412	5979	798	1356	683	2187	1422	1157	3510
K03786	3-dehydroquinate dehydratase II [EC:4.2.1.10]	7477	8379	11335	8237	10681	10320	7135	8267	9671	5175	6732	7539	8757	7342	6824
K03789	ribosomal-protein-alanine N-acetyltransferase [EC:2.3.1.128]	8355	7035	9599	10880	10510	8747	8429	9654	8762	6719	10428	8127	10913	9145	5955
K03788	acid phosphatase (class B) [EC:3.1.3.2]	13	1	22	3	1	3	0	1	1	0	0	2	0	0	1
K10700	ethylbenzene hydroxylase [EC:1.17.99.2]	0	0	1	0	0	0	0	0	0	0	0	0	0	0	0
K00342	NADH-quinone oxidoreductase subunit M [EC:1.6.5.3];NADH dehydrogenase I subunit M [EC:1.6.5.3]	941	1779	539	176	5197	245	2855	3299	3696	1067	461	1470	873	874	718
K03124	transcription initiation factor TFIIB	5	3	3	1	2	3	2	2	2	8	6	32	18	4	19
K03120	transcription initiation factor TFIID TATA-box-binding protein	0	0	0	0	0	1	0	0	0	0	0	0	2	0	0
K12527	putative selenate reductase [EC:1.97.1.9]	192	1080	4056	76	423	5142	22	1181	2148	74	166	119	82	618	64
K12526	bifunctional diaminopimelate decarboxylase/aspartate kinase [EC:4.1.1.20 2.7.2.4];bifunctional diaminopimelate decarboxylase / aspartate kinase [EC:4.1.1.20 2.7.2.4]	1	0	1	0	0	2	0	10	2	0	0	0	1	0	0
K12525	bifunctional aspartokinase/homoserine dehydrogenase 2 [EC:2.7.2.4 1.1.1.3];bifunctional aspartokinase / homoserine dehydrogenase 2 [EC:2.7.2.4 1.1.1.3]	30	17	44	6	2	6	0	25	322	0	1	5	0	0	3
K12524	bifunctional aspartokinase/homoserine dehydrogenase 1 [EC:2.7.2.4 1.1.1.3];bifunctional aspartokinase / homoserine dehydrogenase 1 [EC:2.7.2.4 1.1.1.3]	1305	3364	477	30	22	219	41	3438	459	2012	696	2840	1920	1300	539
K09789	hypothetical protein	155	163	36	1	4	25	19	189	18	857	216	1201	504	502	129
K09788	hypothetical protein	257	47	80	22	6075	38	2817	428	3770	19	14	16	17	28	76
K09787	hypothetical protein	3118	2487	5675	4519	1582	5770	1857	5480	2772	3796	5527	7740	4261	6153	4686
K09786	hypothetical protein	92	101	211	49	939	133	13	531	286	424	242	1215	458	572	798
K09785	hypothetical protein	0	1	1	0	0	0	0	24	1	0	0	0	0	0	0
K09781	hypothetical protein	247	24	211	112	5154	136	2837	856	3793	5	10	7	7	13	80
K09780	hypothetical protein	1237	97	1061	373	5350	574	2905	1011	4038	28	69	242	29	154	106
K10960	geranylgeranyl reductase [EC:1.3.1.83]	959	13	728	8	9	95	0	56	90	2	1	1	2	2	1
K09879	isorenieratene synthase	2	0	4	2	3	6	0	13	3	0	0	0	0	1	1
K06318	forespore regulator of the sigma-K checkpoint	0	0	1	1	0	0	0	0	0	0	0	0	0	0	7
K06311	spore germination protein	0	1	5	2	0	1	1	1	1	0	0	3	0	0	440
K06310	spore germination protein	193	202	333	130	31	174	13	363	85	210	180	383	174	165	730
K06312	spore germination protein	0	0	1	1	0	1	0	1	0	0	0	0	0	0	439
K06314	prespore-specific regulator	0	0	1	2	0	1	1	1	1	0	0	0	0	0	443
K06317	inhibitor of the pro-sigma K processing machinery	94	204	164	27	27	113	13	918	83	441	251	1226	477	587	808
K11386	arabinosyltransferase B [EC:2.4.2.-]	1	0	3	3	1	4	3	3	2	0	1	0	0	1	0
K11387	arabinosyltransferase C [EC:2.4.2.-]	8	2	14	10	4	19	10	11	9	1	2	0	0	2	1
K11384	two-component system, NtrC family, response regulator AlgB	23	60	25	0	903	3	1	180	38	4	3	3	6	11	1
K11385	arabinosyltransferase A [EC:2.4.2.-]	0	0	2	1	0	1	0	2	0	0	0	0	0	0	0
K11382	MFS transporter, OPA family, phosphoglycerate transporter protein	0	0	0	0	0	0	0	1	0	0	0	0	0	0	0
K11383	two-component system, NtrC family, sensor histidine kinase KinB [EC:2.7.13.3]	6	1	3	0	900	2	0	3	35	0	0	0	0	1	0
K11381	2-oxoisovalerate dehydrogenase E1 component [EC:1.2.4.4]	57	92	51	18	11	42	2	302	20	116	130	135	481	176	242
K11949	4-(2-carboxyphenyl)-2-oxobut-3-enoate aldolase [EC:4.1.2.34]	1	0	2	1	2	2	0	11	0	0	0	0	0	0	1
K04032	ethanolamine utilization cobalamin adenosyltransferase [EC:2.5.1.17]	53	105	156	262	207	343	69	143	161	44	71	259	58	155	39
K04033	AraC family transcriptional regulator, ethanolamine operon transcriptional activator	13	4	44	8	804	12	0	71	41	0	0	3	1	1	3
K04030	ethanolamine utilization protein EutQ	64	135	206	277	210	354	72	174	166	55	88	300	73	167	57
K04031	ethanolamine utilization protein EutS	1143	934	2364	946	625	2450	330	2440	992	1033	2381	3961	1117	2373	2437
K04036	divinyl protochlorophyllide a 8-vinyl-reductase [EC:1.-.-.-]	0	0	3	1	2	2	0	16	2	0	0	0	0	0	0
K04037	light-independent protochlorophyllide reductase subunit L [EC:1.3.7.7];light-independent protochlorophyllide reductase subunit L [EC:1.18.-.-]	959	12	725	6	6	94	0	39	90	2	1	1	1	2	1
K04034	anaerobic magnesium-protoporphyrin IX monomethyl ester cyclase [EC:4.-.-.-]	40	106	130	192	100	39	201	248	39	18	47	48	14	56	55
K04035	magnesium-protoporphyrin IX monomethyl ester (oxidative) cyclase [EC:1.14.13.81]	1933	52	1457	14	9	189	0	191	176	80	95	74	146	136	208
K04038	light-independent protochlorophyllide reductase subunit N [EC:1.18.-.-];light-independent protochlorophyllide reductase subunit N [EC:1.3.7.7]	959	12	726	6	6	94	0	40	90	2	1	1	1	2	1
K04039	light-independent protochlorophyllide reductase subunit B [EC:1.18.-.-];light-independent protochlorophyllide reductase subunit B [EC:1.3.7.7]	959	12	726	6	6	94	0	40	90	2	1	1	1	2	1
K07046	None	32	34	251	153	904	170	19	1194	164	12	17	9	12	43	443
K07047	None	1636	2311	7475	3565	7968	7473	4604	7288	7113	2939	3357	5355	2962	5231	2675
K07044	None	17	3	31	11	1394	20	36	113	79	0	2	1	0	3	176
K07045	None	1267	1735	2881	2312	1475	1132	1368	4843	855	3618	5271	6565	4210	5518	3572
K07042	probable rRNA maturation factor	9148	8347	14673	11825	11080	15013	8467	10915	11675	6847	10742	8377	11183	9873	6444
K07043	None	8227	8138	12919	10517	18281	12855	12612	10798	17140	7289	10540	9036	10958	10131	7750
K07040	uncharacterized protein	8911	8065	13706	10267	10630	14608	7453	9353	11404	4865	8411	7331	8949	7756	5783
K07041	None	0	0	4	2	2	4	0	21	0	0	0	0	2	0	0
K07048	phosphotriesterase-related protein	41	56	105	36	5	28	11	107	16	23	16	45	23	21	24
K02584	Nif-specific regulatory protein	61	131	110	59	29	30	10	599	29	157	231	151	299	299	473
K10039	putative glutamine transport system substrate-binding protein	6446	4484	4207	7506	5155	3602	3828	2374	1892	3033	5113	674	6807	3094	2795
K10038	glutamine transport system ATP-binding protein [EC:3.6.3.-]	21	16	40	12	7	8	2	52	6	4	12	7	4	15	10
K10037	glutamine transport system permease protein	221	495	102	38	4	5	1	824	3	0	2	2	0	1	1
K10036	glutamine transport system substrate-binding protein	1032	2326	458	433	33	64	241	8184	63	399	135	624	214	231	198
K04788	mycobactin phenyloxazoline synthetase	0	0	2	0	0	1	0	2	0	0	0	0	0	0	0
K04789	mycobactin peptide synthetase MbtE	0	0	2	0	0	0	0	2	0	0	0	0	0	0	0
K04784	yersiniabactin nonribosomal peptide synthetase	6	1	0	0	0	0	0	0	0	2	2	2	0	2	0
K04785	yersiniabactin synthetase, thiazolinyl reductase component	6	1	0	0	0	0	0	0	0	0	0	0	0	0	0
K04787	mycobactin salicyl-AMP ligase [EC:6.3.2.-]	0	0	2	0	0	0	0	2	0	0	0	0	0	0	0
K04780	nonribosomal peptide synthetase DhbF	0	0	1	0	0	1	0	0	0	0	0	0	0	0	3
K04781	salicylate synthetase [EC:5.4.4.2 4.2.99.21];salicylate synthetase [EC:5.4.4.2 4.1.3.-]	13	7	3	2	1	2	0	10	1	17	24	19	33	18	64
K04782	isochorismate pyruvate-lyase [EC:4.1.3.-];isochorismate pyruvate lyase [EC:4.2.99.21]	13	2	16	10	552	13	2	60	40	0	2	1	0	1	1
K04783	yersiniabactin salicyl-AMP ligase [EC:6.3.2.-]	6	1	0	0	0	0	0	0	0	0	0	0	0	0	0
K13607	cinnamoyl-CoA:phenyllactate CoA-transferase [EC:2.8.3.17]	0	0	0	0	0	1	0	0	0	0	0	0	1	2	1
[truncated: 3,947 more rows]
