# Supplementary material for: Characterization of the bacterial microbiota composition and evolution at different intestinal tract in wild pigs (Sus scrofa ussuricus)
Source: PeerJ. 2020 May 26;8:e9124. doi: 10.7717/peerj.9124 (PMC7258971; doi:10.7717/peerj.9124)
Supplement: Table S8 [file peerj-08-9124-s008.xlsx]

## Sheet: 工作表1
Table S8 Predicted KEEG pathway of the microbiota in five gut segements in wild pigs
KEEG pathway A	KEEG pathway B	KEEG pathway C	DU1	DU2	DU3	JE1	JE2	JE3	IL1	IL2	IL3	CE1	CE2	CE3	CO1	CO2	CO3
Cellular Processes	Cell Communication	Adherens junction	0	0	0	0	0	0	0	1	0	0	0	0	0	0	0
Cellular Processes	Cell Communication	Focal adhesion	0	0	0	0	0	0	0	1	0	0	0	0	0	0	0
Cellular Processes	Cell Communication	Tight junction	0	0	0	0	0	0	0	1	0	0	0	0	0	0	0
Cellular Processes	Cell Growth and Death	Apoptosis	490	41	434	617	8762	262	5672	1779	7198	30	20	8	122	22	102
Cellular Processes	Cell Growth and Death	Cell cycle	0	0	0	0	0	1	0	0	0	0	0	0	2	0	0
Cellular Processes	Cell Growth and Death	Cell cycle - Caulobacter	101505	99872	150169	111598	119407	147922	83070	148432	120087	75527	108407	103316	115627	103450	102962
Cellular Processes	Cell Growth and Death	Meiosis - yeast	4024	355	3287	293	159	608	123	3186	675	504	476	692	968	480	599
Cellular Processes	Cell Growth and Death	p53 signaling pathway	257	37	371	201	4565	212	2818	1740	3676	5	15	7	10	20	32
Cellular Processes	Cell Motility	Bacterial chemotaxis	44576	42012	91398	45503	75447	65044	23175	122133	54317	52655	59405	157100	59947	92047	81247
Cellular Processes	Cell Motility	Bacterial motility proteins	112401	84418	197962	89551	250851	131673	99429	250825	177246	104079	110473	305898	119545	177057	158977
Cellular Processes	Cell Motility	Cytoskeleton proteins	61808	57611	102814	66862	65274	97004	48416	93269	73834	51785	73398	86104	69744	76943	62766
Cellular Processes	Cell Motility	Flagellar assembly	25113	27499	61818	27948	47834	39595	9615	102971	30175	38650	36594	126399	39590	65212	64594
Cellular Processes	Cell Motility	Regulation of actin cytoskeleton	0	0	0	0	0	0	0	1	0	0	0	0	0	0	0
Cellular Processes	Transport and Catabolism	Endocytosis	208	2	7	3	4149	7	2814	17	3491	1	0	0	0	1	46
Cellular Processes	Transport and Catabolism	Lysosome	9487	13180	11500	10936	6036	12754	5403	13413	7585	12910	10496	13753	15869	11049	15862
Cellular Processes	Transport and Catabolism	Peroxisome	45379	42029	51257	51762	89517	45819	60063	49769	72512	31698	43080	34916	54775	38501	44567
Cellular Processes	Transport and Catabolism	Phagosome	0	0	0	0	0	1	0	1	0	0	0	0	2	0	0
Environmental Information Processing	Membrane Transport	ABC transporters	658723	604674	1128353	765028	910182	1117244	572020	1099144	854845	484538	728440	706634	747952	719533	581145
Environmental Information Processing	Membrane Transport	Bacterial secretion system	97996	99138	160446	108542	170403	156421	96011	182140	144134	78662	105834	111103	114173	107973	110319
Environmental Information Processing	Membrane Transport	Phosphotransferase system (PTS)	67967	75188	270873	119262	58711	318139	56898	137036	144744	97208	138869	100327	110999	148462	73550
Environmental Information Processing	Membrane Transport	Secretion system	213750	185503	343380	221374	412038	322052	223356	346369	343562	160711	211711	260224	228450	230864	214290
Environmental Information Processing	Membrane Transport	Transporters	1198658	1112504	2267840	1432118	1464157	2339211	949201	1969424	1571043	955834	1427459	1379651	1415246	1420811	1114582
Environmental Information Processing	Signal Transduction	Calcium signaling pathway	958	11	717	2	0	90	0	12	84	2	0	1	1	2	0
Environmental Information Processing	Signal Transduction	MAPK signaling pathway - yeast	3941	4620	12084	2271	7100	12913	3729	10248	9261	3863	4115	9666	3811	6239	4957
Environmental Information Processing	Signal Transduction	Phosphatidylinositol signaling system	19035	17163	28421	23202	27963	27483	19727	26484	26079	14671	20787	15562	23423	18633	17662
Environmental Information Processing	Signal Transduction	Two-component system	225688	166220	331059	209487	396948	264151	189395	422341	298786	169545	206388	334864	219560	249745	235060
Environmental Information Processing	Signal Transduction	VEGF signaling pathway	0	0	1	0	0	0	0	0	0	0	0	0	0	0	0
Environmental Information Processing	Signal Transduction	mTOR signaling pathway	0	0	0	0	0	1	0	0	0	0	0	0	2	0	0
Environmental Information Processing	Signaling Molecules and Interaction	Bacterial toxins	30283	30669	49470	42721	28419	50075	20805	31999	27993	23872	35269	26547	39228	33128	22977
Environmental Information Processing	Signaling Molecules and Interaction	Cellular antigens	14465	14935	10783	17991	20246	7941	15826	13363	13047	11264	14791	5241	19237	11424	13162
Environmental Information Processing	Signaling Molecules and Interaction	G protein-coupled receptors	11	70	64	170	89	10	195	90	17	8	24	22	4	29	12
Environmental Information Processing	Signaling Molecules and Interaction	Ion channels	12241	11359	14804	18307	10570	14493	8940	6400	8653	7474	12191	2184	15325	8726	4110
Genetic Information Processing	Folding, Sorting and Degradation	Chaperones and folding catalysts	177952	172537	257989	176154	273338	247550	177894	269984	258053	130999	173107	188361	187701	176224	169254
Genetic Information Processing	Folding, Sorting and Degradation	Proteasome	12771	13874	16514	17161	14735	16186	11966	11589	12976	10394	15711	9761	18214	13250	6768
Genetic Information Processing	Folding, Sorting and Degradation	Protein export	114080	115320	181643	128586	154799	183325	112386	162625	162046	91417	125820	121111	136181	124253	122533
Genetic Information Processing	Folding, Sorting and Degradation	Protein processing in endoplasmic reticulum	8903	8464	13120	4498	8022	10736	4979	17777	8757	6666	6950	12543	7388	9149	5400
Genetic Information Processing	Folding, Sorting and Degradation	RNA degradation	101427	96691	147514	110962	123478	142526	87330	127353	121490	72742	101794	95830	114204	99173	91165
Genetic Information Processing	Folding, Sorting and Degradation	Sulfur relay system	35982	24295	67847	28853	85930	60823	48092	66796	80018	25968	35612	55389	28692	43263	49070
Genetic Information Processing	Folding, Sorting and Degradation	Ubiquitin system	5593	4467	4463	7361	8898	3697	6525	1182	6465	2780	4959	243	6588	3014	4822
Genetic Information Processing	Replication and Repair	Base excision repair	77199	73755	120451	93234	101128	117929	73119	116850	99966	66922	89895	90213	94526	91186	78916
Genetic Information Processing	Replication and Repair	Chromosome	283987	273813	440927	307913	370549	428555	257992	423551	378633	224037	305902	332381	318404	312598	300341
Genetic Information Processing	Replication and Repair	DNA repair and recombination proteins	589342	575977	867515	693139	701734	859053	512254	785563	705458	457195	646674	603517	697847	625040	558689
Genetic Information Processing	Replication and Repair	DNA replication	139049	140247	206892	171730	160793	206980	121154	180039	164009	111865	156625	141668	172018	150497	138048
Genetic Information Processing	Replication and Repair	DNA replication proteins	238800	238376	355862	285516	273645	346417	206186	324847	281336	195697	268885	271495	289711	267813	242039
Genetic Information Processing	Replication and Repair	Homologous recombination	192370	193770	296548	225606	234132	302352	171628	258742	246892	151068	210170	201496	229327	206478	188564
Genetic Information Processing	Replication and Repair	Mismatch repair	159985	156670	234853	186131	178085	228846	132173	214879	183069	127989	178265	181209	189657	176161	161474
Genetic Information Processing	Replication and Repair	Non-homologous end-joining	124	256	943	860	2599	576	436	4208	637	104	235	265	191	229	1236
Genetic Information Processing	Replication and Repair	Nucleotide excision repair	90139	92162	131180	110034	95662	133239	72124	110404	98542	67854	98535	84126	109648	91383	80993
Genetic Information Processing	Transcription	Basal transcription factors	95	130	190	284	211	381	85	360	183	183	229	479	382	317	274
Genetic Information Processing	Transcription	RNA polymerase	40399	38355	60611	48461	44530	60911	33901	48114	47520	29553	43086	36337	46688	40857	34570
Genetic Information Processing	Transcription	Transcription factors	247632	236479	453917	292035	331074	444641	201695	416649	324452	207587	307454	372509	293378	325727	271296
Genetic Information Processing	Transcription	Transcription machinery	149155	150132	233206	153424	173853	217066	112978	233170	171820	122318	163559	227240	171830	183789	173991
Genetic Information Processing	Translation	Aminoacyl-tRNA biosynthesis	263901	261626	397794	322024	311456	401767	234931	338379	321440	205045	292326	252540	321849	276738	242607
Genetic Information Processing	Translation	RNA transport	15743	10798	22534	15933	26418	23516	17729	24516	25794	14787	19958	26054	17331	21183	24395
Genetic Information Processing	Translation	Ribosome	520174	528276	784864	625666	592380	798300	451702	660630	624589	406219	574006	508813	631615	548487	497238
Genetic Information Processing	Translation	Ribosome Biogenesis	272038	267393	404362	323508	393727	405138	275844	376017	379512	224210	312908	299008	334561	304706	275033
Genetic Information Processing	Translation	Ribosome biogenesis in eukaryotes	14566	14652	18938	18975	21014	19140	15066	15606	18539	10649	15942	10068	18671	13505	10996
Genetic Information Processing	Translation	Translation factors	109418	111077	170561	126477	125889	173307	93264	147716	135660	86408	119824	115607	129786	118377	108420
Genetic Information Processing	Translation	mRNA surveillance pathway	0	1	0	0	4	3	0	3	1	2	0	0	4	2	0
Human Diseases	Cancers	Prostate cancer	4132	5122	9323	3376	6873	9155	4620	9940	7710	5042	6085	9509	5441	7598	4248
Human Diseases	Cancers	Renal cell carcinoma	2984	2204	6946	2915	7013	6995	4217	5378	7025	2031	2447	1003	2668	2679	4326
Human Diseases	Cancers	Small cell lung cancer	257	37	372	201	4565	212	2818	1740	3676	5	15	7	10	20	32
Human Diseases	Infectious Diseases	Leishmaniasis	0	0	1	0	0	0	0	0	0	0	0	0	0	0	0
Human Diseases	Infectious Diseases	Measles	0	0	0	0	0	1	0	0	0	0	0	0	2	0	0
Human Diseases	Infectious Diseases	Shigellosis	0	0	42	0	0	6	0	1	0	0	0	4	0	0	2
Human Diseases	Cancers	Bladder cancer	228	502	168	70	32	55	12	1008	203	4	7	5	3	7	8
Human Diseases	Cancers	Colorectal cancer	257	37	371	201	4565	212	2818	1740	3676	5	15	7	10	20	32
Human Diseases	Cancers	Pathways in cancer	7342	7314	16624	6492	18451	16342	11655	17029	18396	7051	8513	10463	8070	10261	8586
Human Diseases	Cardiovascular Diseases	Arrhythmogenic right ventricular cardiomyopathy (ARVC)	0	0	0	0	0	0	0	1	0	0	0	0	0	0	0
Human Diseases	Cardiovascular Diseases	Dilated cardiomyopathy (DCM)	0	0	0	0	0	0	0	1	0	0	0	0	0	0	0
Human Diseases	Cardiovascular Diseases	Hypertrophic cardiomyopathy (HCM)	0	1	6	2	3	4	0	31	161	0	0	0	1	0	0
Human Diseases	Cardiovascular Diseases	Viral myocarditis	257	37	371	201	4565	212	2818	1741	3676	5	15	7	10	20	32
Human Diseases	Immune System Diseases	Primary immunodeficiency	10291	8666	11872	12436	12106	12763	8590	9761	11034	7178	10484	6395	11614	8318	9285
Human Diseases	Immune System Diseases	Systemic lupus erythematosus	12	1	10	2	761	3	1	15	34	2	1	2	5	8	0
Human Diseases	Infectious Diseases	African trypanosomiasis	4435	4445	3858	6998	5719	3642	3683	1719	2967	2732	4871	206	6795	2897	4168
Human Diseases	Infectious Diseases	Amoebiasis	1119	327	1290	157	195	623	21	1647	361	600	417	1497	795	716	1355
Human Diseases	Infectious Diseases	Bacterial invasion of epithelial cells	967	26	761	5	0	96	0	35	85	2	0	6	7	2	6
Human Diseases	Infectious Diseases	Chagas disease (American trypanosomiasis)	4410	4419	3827	6987	4817	3620	3680	1667	3075	2695	4833	147	6699	2856	4074
Human Diseases	Infectious Diseases	Epithelial cell signaling in Helicobacter pylori infection	12463	13723	19030	13649	18274	17674	12664	21368	16626	12681	16900	19054	16985	17435	15903
Human Diseases	Infectious Diseases	Hepatitis C	0	0	0	0	0	1	0	0	0	0	0	0	2	0	0
Human Diseases	Infectious Diseases	Influenza A	257	37	371	201	4565	213	2818	1741	3676	5	15	7	12	20	32
Human Diseases	Infectious Diseases	Pathogenic Escherichia coli infection	0	0	105	0	0	15	0	1	0	0	0	10	0	0	5
Human Diseases	Infectious Diseases	Pertussis	2043	1107	1388	209	17776	408	4162	2509	7880	1040	390	1483	1082	785	3391
Human Diseases	Infectious Diseases	Staphylococcus aureus infection	5770	6363	25138	6479	3906	31304	717	6943	14861	425	1006	758	1339	3041	5364
Human Diseases	Infectious Diseases	Toxoplasmosis	257	37	371	201	4565	212	2818	1740	3676	5	15	7	10	20	32
Human Diseases	Infectious Diseases	Tuberculosis	38114	30231	49946	38222	39582	43076	29687	41374	38481	25982	35872	33133	38910	34811	27088
Human Diseases	Infectious Diseases	Vibrio cholerae infection	1	0	0	0	0	2	0	8	158	0	0	0	2	0	0
Human Diseases	Infectious Diseases	Vibrio cholerae pathogenic cycle	15236	12764	21112	12869	17922	16513	9167	18383	15091	9673	12833	17487	13564	14781	15460
Human Diseases	Metabolic Diseases	Type I diabetes mellitus	10936	10197	15841	11919	11390	15402	8522	13089	12095	8656	11240	10915	12604	10997	9599
Human Diseases	Metabolic Diseases	Type II diabetes mellitus	12147	11675	16739	12272	8043	15384	5831	14446	8529	7648	11000	9677	11949	10440	9218
Human Diseases	Neurodegenerative Diseases	Alzheimer's disease	11118	10192	16077	12404	36577	15783	22607	17376	30798	7829	11079	9806	12436	10582	10280
Human Diseases	Neurodegenerative Diseases	Amyotrophic lateral sclerosis (ALS)	1251	612	1364	997	19823	962	11617	6379	14961	1223	535	1740	1214	833	3563
Human Diseases	Neurodegenerative Diseases	Huntington's disease	4811	1660	5673	2773	31491	2399	18194	12855	23627	2208	1461	6179	1957	3328	8523
Human Diseases	Neurodegenerative Diseases	Parkinson's disease	1049	114	1045	511	20315	565	11280	4575	14989	18	41	25	35	59	196
Human Diseases	Neurodegenerative Diseases	Prion diseases	342	292	444	564	4582	307	3106	2576	3795	224	178	354	180	232	782
Metabolism	Amino Acid Metabolism	Alanine, aspartate and glutamate metabolism	206144	213435	325460	240085	278724	326413	194437	295541	276309	167932	236741	218455	255677	229360	180160
Metabolism	Amino Acid Metabolism	Amino acid related enzymes	302946	315055	462552	359773	402160	462141	287623	417074	394927	240067	340639	309358	372777	328111	303775
Metabolism	Amino Acid Metabolism	Arginine and proline metabolism	205862	193332	305742	219420	321951	279382	192499	324452	273836	164021	224142	260909	236803	233766	210854
Metabolism	Amino Acid Metabolism	Cysteine and methionine metabolism	194133	200636	284814	237685	216296	270725	159112	266196	206349	159852	226421	216736	246515	221875	172271
Metabolism	Amino Acid Metabolism	Glycine, serine and threonine metabolism	155054	160570	221981	179768	243625	210726	157282	232284	208620	124070	175314	167308	191285	168594	162586
Metabolism	Amino Acid Metabolism	Histidine metabolism	103943	108598	170974	135920	183049	169135	127390	164667	164929	103579	140971	132651	148162	139755	107650
Metabolism	Amino Acid Metabolism	Lysine biosynthesis	155683	154744	208446	182259	184372	204268	132344	200715	169806	119714	174279	167532	188391	164904	141384
Metabolism	Amino Acid Metabolism	Lysine degradation	19269	12613	30677	17713	145638	23347	81215	54227	110496	15723	19263	28072	18060	24396	40674
Metabolism	Amino Acid Metabolism	Phenylalanine metabolism	27688	27735	45861	32055	71293	39559	41576	67517	54858	27074	34874	37558	37004	36903	31960
Metabolism	Amino Acid Metabolism	Phenylalanine, tyrosine and tryptophan biosynthesis	157503	167149	219720	185559	215498	210998	153125	226717	193159	132741	191789	168632	208171	176672	167925
Metabolism	Amino Acid Metabolism	Tryptophan metabolism	27958	20153	45025	25510	170738	39912	93321	61467	130678	20250	25695	28671	27093	27975	39784
Metabolism	Amino Acid Metabolism	Tyrosine metabolism	73927	70623	118510	88172	128526	117314	79790	104530	114055	50205	73003	65318	79699	71518	66357
Metabolism	Amino Acid Metabolism	Valine, leucine and isoleucine biosynthesis	145859	139026	182419	162882	190409	165561	132440	183600	165430	106676	157342	150793	177192	144323	136133
Metabolism	Amino Acid Metabolism	Valine, leucine and isoleucine degradation	43094	36244	63847	41697	232440	52020	125448	100065	176182	29197	38356	44655	40462	41962	66677
Metabolism	Biosynthesis of Other Secondary Metabolites	Betalain biosynthesis	4	2	13	6	297	6	1	40	4	0	0	0	0	0	0
Metabolism	Biosynthesis of Other Secondary Metabolites	Butirosin and neomycin biosynthesis	7854	9754	19457	5315	4241	19171	2300	17063	9519	7361	8191	15415	7558	11671	9481
Metabolism	Biosynthesis of Other Secondary Metabolites	Caffeine metabolism	13	6	41	18	19	30	9	80	24	3	5	3	6	11	3
Metabolism	Biosynthesis of Other Secondary Metabolites	Clavulanic acid biosynthesis	0	0	0	0	1	2	0	0	0	0	0	0	0	0	0
Metabolism	Biosynthesis of Other Secondary Metabolites	Flavone and flavonol biosynthesis	716	424	1517	992	244	1681	166	528	968	222	233	305	359	186	654
Metabolism	Biosynthesis of Other Secondary Metabolites	Flavonoid biosynthesis	3073	299	3140	1772	1200	1122	1083	935	696	1891	2318	1087	2110	2245	3743
Metabolism	Biosynthesis of Other Secondary Metabolites	Indole alkaloid biosynthesis	2	2	10	6	3	4	1	37	2	0	0	0	0	0	0
Metabolism	Biosynthesis of Other Secondary Metabolites	Isoflavonoid biosynthesis	16	24	11	5	2	2	0	126	1	74	92	70	139	130	213
Metabolism	Biosynthesis of Other Secondary Metabolites	Isoquinoline alkaloid biosynthesis	10384	12766	15676	11596	18251	14271	11520	19235	15153	8253	11412	13023	12306	12311	12082
Metabolism	Biosynthesis of Other Secondary Metabolites	Novobiocin biosynthesis	26906	30635	42694	33536	35455	40861	25362	46594	33361	23967	33465	32432	36315	33363	27948
Metabolism	Biosynthesis of Other Secondary Metabolites	Penicillin and cephalosporin biosynthesis	2687	1850	6945	1342	3171	7584	281	4666	4182	1545	897	2641	1800	1983	5297
Metabolism	Biosynthesis of Other Secondary Metabolites	Phenylpropanoid biosynthesis	21791	23799	37040	21639	15835	38196	10833	28633	20292	17668	23695	25077	25619	23173	17369
Metabolism	Biosynthesis of Other Secondary Metabolites	Stilbenoid, diarylheptanoid and gingerol biosynthesis	2080	237	2442	1831	650	964	1096	1217	576	1771	2188	848	1949	2121	3189
Metabolism	Biosynthesis of Other Secondary Metabolites	Streptomycin biosynthesis	60629	60728	93525	65570	49880	89460	35214	80516	53309	47180	63049	58383	71563	62328	49488
Metabolism	Biosynthesis of Other Secondary Metabolites	Tropane, piperidine and pyridine alkaloid biosynthesis	21414	24192	32503	24038	33303	28634	20482	39890	27148	17547	23855	28173	25727	25831	24076
Metabolism	Biosynthesis of Other Secondary Metabolites	beta-Lactam resistance	2948	1932	6914	1382	2161	8627	187	4173	4089	1121	610	1630	1181	1332	4184
Metabolism	Carbohydrate Metabolism	Amino sugar and nucleotide sugar metabolism	261012	270844	469836	317868	264181	485567	202494	359569	308896	234031	320747	285425	334320	321114	243282
Metabolism	Carbohydrate Metabolism	Ascorbate and aldarate metabolism	14544	17976	38020	12854	39174	43313	20613	34083	40424	10144	14612	12511	15307	15026	18553
Metabolism	Carbohydrate Metabolism	Butanoate metabolism	103371	102132	179806	116642	248145	166091	148643	237360	221099	83792	110635	147972	113874	123655	118902
Metabolism	Carbohydrate Metabolism	C5-Branched dibasic acid metabolism	60716	59914	62282	69409	80254	52123	56768	75479	62739	43598	66011	59527	76203	57003	53861
Metabolism	Carbohydrate Metabolism	Citrate cycle (TCA cycle)	93690	98147	116475	99166	166657	110039	109575	186715	144390	72724	84720	104010	106093	88254	128777
Metabolism	Carbohydrate Metabolism	Fructose and mannose metabolism	128158	135540	301744	150061	121883	317302	90810	224079	172436	129624	181192	180260	165542	190857	135751
Metabolism	Carbohydrate Metabolism	Galactose metabolism	118211	124020	213613	148048	96153	224032	78781	154755	126853	108297	150415	139079	155632	146336	117134
Metabolism	Carbohydrate Metabolism	Glycolysis / Gluconeogenesis	224320	208033	343508	256776	260830	347744	181928	280476	271360	159020	228540	211094	247422	220161	208426
Metabolism	Carbohydrate Metabolism	Glyoxylate and dicarboxylate metabolism	71549	73789	131295	73090	153427	120704	88379	158687	133537	64432	88421	93871	84461	91385	83990
Metabolism	Carbohydrate Metabolism	Inositol phosphate metabolism	22221	20460	26728	28561	41422	24217	24809	30864	29599	15450	22182	14176	27324	18389	20893
Metabolism	Carbohydrate Metabolism	Pentose and glucuronate interconversions	71941	77361	129932	86991	86650	126569	62542	119672	89264	65668	90219	94746	95473	92784	74185
Metabolism	Carbohydrate Metabolism	Pentose phosphate pathway	154378	151157	277195	180606	159912	281539	112892	215142	182170	122777	182241	166535	182770	178412	153428
Metabolism	Carbohydrate Metabolism	Propanoate metabolism	89522	83609	150522	104429	266066	144800	158455	157521	226006	69566	98999	108714	102720	103174	117197
Metabolism	Carbohydrate Metabolism	Pyruvate metabolism	165193	151360	288723	172639	269145	281415	169049	257828	265543	125914	176795	212528	178231	187782	197175
Metabolism	Carbohydrate Metabolism	Starch and sucrose metabolism	191281	192439	306784	207978	154943	314095	115551	219884	187333	134607	194954	184633	212476	187922	148558
Metabolism	Energy Metabolism	Carbon fixation in photosynthetic organisms	119906	123708	210334	128684	124845	210845	91171	171639	145320	91976	132487	121758	137384	130228	125095
Metabolism	Energy Metabolism	Carbon fixation pathways in prokaryotes	163080	166984	233339	173181	296561	224107	194466	293883	269082	129690	166510	207241	183337	176971	192507
Metabolism	Energy Metabolism	Methane metabolism	196505	182508	306890	208181	262454	310697	176370	282174	264585	160899	222205	257648	226845	227702	198586
Metabolism	Energy Metabolism	Nitrogen metabolism	121482	123603	186919	136312	202488	177948	127023	209831	179346	100287	137693	143578	148388	137975	121331
Metabolism	Energy Metabolism	Oxidative phosphorylation	191151	168169	258675	186117	291720	233231	188623	316178	258493	148971	190361	223779	201467	197838	192474
Metabolism	Energy Metabolism	Photosynthesis	136131	81913	168036	105763	91744	129683	74955	104788	100663	73101	101109	78844	106263	95387	74970
Metabolism	Energy Metabolism	Photosynthesis - antenna proteins	16311	187	12189	38	0	1534	0	174	1432	30	4	17	17	34	0
Metabolism	Energy Metabolism	Photosynthesis proteins	153727	82335	181458	106085	96421	131650	77865	107656	106018	73319	101254	79152	106423	95562	75730
Metabolism	Energy Metabolism	Sulfur metabolism	47579	45439	67929	48885	68853	61101	43003	72779	60558	34765	48527	46243	53250	47616	54343
Metabolism	Enzyme Families	Cytochrome P450	1	1	4	2	2	4	3	5	3	0	1	0	0	1	0
Metabolism	Enzyme Families	Peptidases	374519	361614	579463	426209	410441	560850	302564	505578	432429	302902	416884	397768	439869	414147	345627
Metabolism	Enzyme Families	Protein kinases	63840	43595	78129	56974	99150	64995	53107	72376	76011	38818	54701	56470	60248	53119	55655
Metabolism	Glycan Biosynthesis and Metabolism	Glycosaminoglycan degradation	3976	7531	4579	2611	1638	4794	605	8770	3360	5887	2090	8956	4649	4297	10094
Metabolism	Glycan Biosynthesis and Metabolism	Glycosphingolipid biosynthesis - ganglio series	2498	5777	2560	562	720	2816	151	6216	2207	4598	1409	6544	3589	2994	3625
Metabolism	Glycan Biosynthesis and Metabolism	Glycosphingolipid biosynthesis - globo series	14611	18493	13902	16703	9167	12942	8313	16011	8131	14754	16022	17932	21253	14985	14370
Metabolism	Glycan Biosynthesis and Metabolism	Glycosphingolipid biosynthesis - lacto and neolacto series	0	1	2	0	0	0	0	6	0	0	0	1	0	0	0
Metabolism	Glycan Biosynthesis and Metabolism	Glycosyltransferases	71346	58736	80442	66418	79148	69452	51704	86134	66741	42611	55151	54869	65126	53782	58536
Metabolism	Glycan Biosynthesis and Metabolism	Lipopolysaccharide biosynthesis	27392	36575	17799	13943	74086	7993	40411	79863	50435	18308	12557	20348	21655	15005	43548
Metabolism	Glycan Biosynthesis and Metabolism	Lipopolysaccharide biosynthesis proteins	43929	53438	39160	35183	115782	30163	61741	101251	75839	31287	30217	34540	43712	31128	59161
Metabolism	Glycan Biosynthesis and Metabolism	N-Glycan biosynthesis	8633	7086	5817	7408	4058	4227	3772	6119	2226	4414	5804	3386	8291	4614	5269
Metabolism	Glycan Biosynthesis and Metabolism	Other glycan degradation	28314	35296	37190	31788	17814	38977	16283	36560	21461	33672	37326	39987	44382	35510	36094
Metabolism	Glycan Biosynthesis and Metabolism	Peptidoglycan biosynthesis	169164	171746	254330	200190	208270	254796	154060	224879	211804	133456	186901	177201	203052	183817	166354
Metabolism	Glycan Biosynthesis and Metabolism	Various types of N-glycan biosynthesis	16	60	22	1	2	2	2	175	4	10	9	34	18	9	19
Metabolism	Lipid Metabolism	Arachidonic acid metabolism	5222	6546	9575	3760	15142	7646	7898	13002	11627	3449	3660	6937	3876	5953	6118
Metabolism	Lipid Metabolism	Biosynthesis of unsaturated fatty acids	21899	15533	32025	15871	84605	27563	46478	34885	67075	12240	17018	22918	17556	19431	28074
Metabolism	Lipid Metabolism	Ether lipid metabolism	346	45	219	136	8556	150	4158	931	6790	53	45	98	123	64	91
Metabolism	Lipid Metabolism	Fatty acid biosynthesis	63957	60113	113051	57251	116962	107145	67062	123645	109212	44072	61825	99527	61120	73534	106737
Metabolism	Lipid Metabolism	Fatty acid elongation in mitochondria	6	0	4	0	2	0	0	2	0	2	1	2	4	8	0
Metabolism	Lipid Metabolism	Fatty acid metabolism	67372	54944	84681	74933	212420	73838	124280	92222	164113	41272	61406	47444	70450	55624	58641
Metabolism	Lipid Metabolism	Glycerolipid metabolism	58679	53680	112521	63102	94657	112754	57997	100809	99841	46903	66915	77660	62692	70056	68384
Metabolism	Lipid Metabolism	Glycerophospholipid metabolism	91383	89767	147228	101581	143010	146206	90387	144098	135816	73786	105480	113767	105268	106325	103961
Metabolism	Lipid Metabolism	Linoleic acid metabolism	4635	6876	21126	7348	10940	22089	5109	22572	13382	8260	11296	14748	9185	13298	8618
Metabolism	Lipid Metabolism	Lipid biosynthesis proteins	96183	88891	144021	88438	176975	135322	100120	155473	154291	65293	88197	116934	97840	95815	122011
Metabolism	Lipid Metabolism	Primary bile acid biosynthesis	6445	5779	6702	10217	10401	6731	7951	4917	7552	6291	9643	4386	10061	7134	4237
Metabolism	Lipid Metabolism	Secondary bile acid biosynthesis	6226	5768	6630	10183	5279	6671	5132	4647	4000	6287	9638	4383	10059	7127	4139
Metabolism	Lipid Metabolism	Sphingolipid metabolism	34083	35649	33509	42371	23125	31330	21420	29233	18688	29873	39806	33673	48604	33972	31123
Metabolism	Lipid Metabolism	Steroid biosynthesis	2162	54	1487	26	4086	217	2812	230	3661	85	99	77	154	159	3532
Metabolism	Lipid Metabolism	Steroid hormone biosynthesis	1442	1002	1204	135	4139	435	1327	1709	3686	133	171	223	489	187	282
Metabolism	Lipid Metabolism	Synthesis and degradation of ketone bodies	7635	5424	15921	10163	44598	14644	24778	16574	36998	5939	8369	10526	6791	9984	11412
Metabolism	Lipid Metabolism	alpha-Linolenic acid metabolism	1513	170	1171	213	9705	331	5663	1473	7750	123	186	153	242	216	1528
Metabolism	Metabolism of Cofactors and Vitamins	Biotin metabolism	18840	18282	26247	14209	40878	23097	24792	37209	36877	15298	18320	25120	19965	19825	29433
Metabolism	Metabolism of Cofactors and Vitamins	Folate biosynthesis	67898	67672	100792	67126	117980	97153	72730	106581	108509	50023	67268	74451	71931	68519	77145
Metabolism	Metabolism of Cofactors and Vitamins	Lipoic acid metabolism	9919	5665	8765	9121	18816	5955	12725	5852	15040	4937	5940	4414	8980	4920	9667
Metabolism	Metabolism of Cofactors and Vitamins	Nicotinate and nicotinamide metabolism	108029	111052	150821	134137	150103	149745	111376	126414	138108	84429	121864	88192	137213	109456	90454
Metabolism	Metabolism of Cofactors and Vitamins	One carbon pool by folate	111661	121238	174277	125656	146599	173941	100349	165623	147306	91288	123759	132516	133439	126407	114554
Metabolism	Metabolism of Cofactors and Vitamins	Pantothenate and CoA biosynthesis	110538	109591	156320	113115	135613	144907	92357	156790	129707	84609	118400	132474	127330	118130	122832
Metabolism	Metabolism of Cofactors and Vitamins	Porphyrin and chlorophyll metabolism	136937	93575	179372	76219	159497	137187	81250	227134	137279	71125	107821	193456	87654	128977	144415
Metabolism	Metabolism of Cofactors and Vitamins	Retinol metabolism	10810	7148	10362	10520	21707	8210	13043	11536	16151	3464	5869	1457	7780	3951	5211
Metabolism	Metabolism of Cofactors and Vitamins	Riboflavin metabolism	42862	37085	57543	42861	66986	49279	44559	68854	60731	32199	39831	49352	41490	43997	46624
Metabolism	Metabolism of Cofactors and Vitamins	Thiamine metabolism	95891	94741	140961	116666	104537	136356	78735	132421	108538	80056	112280	107638	118629	108860	108004
Metabolism	Metabolism of Cofactors and Vitamins	Ubiquinone and other terpenoid-quinone biosynthesis	48071	36721	48624	33633	70564	34632	43162	54376	59570	21794	25351	19431	34554	23191	44038
Metabolism	Metabolism of Cofactors and Vitamins	Vitamin B6 metabolism	41007	44698	56225	46754	58051	54000	40464	56003	52086	31159	43195	37443	51210	40301	36993
Metabolism	Metabolism of Other Amino Acids	Cyanoamino acid metabolism	37187	39838	68414	34230	52187	68624	30675	70705	52818	30935	39389	51243	39268	43283	34509
Metabolism	Metabolism of Other Amino Acids	D-Alanine metabolism	23268	23672	43426	29040	24922	44841	18657	32587	30758	18449	25420	24409	27430	26279	20289
Metabolism	Metabolism of Other Amino Acids	D-Arginine and D-ornithine metabolism	150	284	1326	1678	630	737	1073	3068	473	1871	2274	744	2056	2094	1098
Metabolism	Metabolism of Other Amino Acids	D-Glutamine and D-glutamate metabolism	31924	30986	47638	37125	35908	46588	25905	41586	36380	24937	33793	34122	37791	33983	32238
Metabolism	Metabolism of Other Amino Acids	Glutathione metabolism	57239	46919	76933	57780	121020	68480	70304	70889	99544	29784	43874	34116	50303	40557	37951
Metabolism	Metabolism of Other Amino Acids	Phosphonate and phosphinate metabolism	8434	10030	17954	10738	19557	18395	10519	19530	16709	7151	9971	13014	11539	11111	11606
Metabolism	Metabolism of Other Amino Acids	Selenocompound metabolism	75427	80846	129341	93639	85245	130373	62022	106140	92935	59420	85626	69884	94868	82321	76049
Metabolism	Metabolism of Other Amino Acids	Taurine and hypotaurine metabolism	22121	21922	33168	26422	31889	32203	21643	30829	28876	18228	24541	21208	26798	23712	21969
Metabolism	Metabolism of Other Amino Acids	beta-Alanine metabolism	23540	21205	38125	13273	123705	32518	64149	60403	96625	16953	20688	33445	18147	24362	36312
Metabolism	Metabolism of Terpenoids and Polyketides	Biosynthesis of 12-, 14- and 16-membered macrolides	0	0	1	0	1	6	0	0	3	0	0	0	0	0	0
Metabolism	Metabolism of Terpenoids and Polyketides	Biosynthesis of siderophore group nonribosomal peptides	2298	2788	5605	576	12447	5257	4449	4332	9648	346	427	577	758	886	4577
Metabolism	Metabolism of Terpenoids and Polyketides	Biosynthesis of ansamycins	14114	17332	33081	21098	15441	32526	13327	29105	19978	18856	26406	23702	24724	26679	20938
Metabolism	Metabolism of Terpenoids and Polyketides	Biosynthesis of type II polyketide backbone	0	0	3	0	0	8	0	6	0	0	0	0	0	0	0
Metabolism	Metabolism of Terpenoids and Polyketides	Biosynthesis of type II polyketide products	9	1	6	2	796	8	0	13	67	0	0	0	0	0	0
Metabolism	Metabolism of Terpenoids and Polyketides	Biosynthesis of vancomycin group antibiotics	10578	11489	20490	11331	7792	21279	5699	16465	11579	8767	11444	11012	12787	11796	9014
Metabolism	Metabolism of Terpenoids and Polyketides	Carotenoid biosynthesis	7761	161	6174	668	502	1002	323	1718	887	58	105	134	394	112	1111
Metabolism	Metabolism of Terpenoids and Polyketides	Geraniol degradation	8122	3737	6027	2457	113541	2851	58260	21173	78885	2198	1638	3566	3055	2603	13553
Metabolism	Metabolism of Terpenoids and Polyketides	Limonene and pinene degradation	13949	9291	20973	9951	115685	17783	64436	39614	89189	8148	10205	16821	9465	12632	25192
Metabolism	Metabolism of Terpenoids and Polyketides	Polyketide sugar unit biosynthesis	34053	35478	57638	36234	25855	56489	18573	49752	30421	29282	38961	37009	42150	39421	33031
Metabolism	Metabolism of Terpenoids and Polyketides	Prenyltransferases	78426	71279	101915	82308	74230	96313	55312	88816	76120	51702	71712	62367	81403	67583	71395
Metabolism	Metabolism of Terpenoids and Polyketides	Terpenoid backbone biosynthesis	121034	120595	187567	143619	148620	185165	109235	158117	152309	98151	137369	127560	147701	135423	114196
Metabolism	Metabolism of Terpenoids and Polyketides	Tetracycline biosynthesis	15891	10368	32188	13052	40802	29815	23927	32106	38744	9433	14890	31366	11032	20078	34573
Metabolism	Metabolism of Terpenoids and Polyketides	Zeatin biosynthesis	10292	11539	15085	11848	11123	15242	8488	13921	11822	7925	11126	9967	12381	10618	9452
Metabolism	Nucleotide Metabolism	Purine metabolism	467378	471761	724392	551338	574389	729435	407398	624188	586195	350415	496351	442322	546312	479625	450274
Metabolism	Nucleotide Metabolism	Pyrimidine metabolism	359909	370507	565615	427574	407815	568074	305500	492814	433776	292658	404419	398547	438615	403829	354769
Metabolism	Xenobiotics Biodegradation and Metabolism	Drug metabolism - other enzymes	55249	62607	89121	64461	59180	88766	42640	80047	65617	44025	61544	70686	65257	64096	67999
Metabolism	Xenobiotics Biodegradation and Metabolism	1,1,1-Trichloro-2,2-bis(4-chlorophenyl)ethane (DDT) degradation	45	54	26	104	7	13	78	1369	151	112	24	149	49	54	48
Metabolism	Xenobiotics Biodegradation and Metabolism	Aminobenzoate degradation	18816	14207	34940	15470	77432	30409	38708	48857	59670	11027	13830	20612	12612	17761	24449
Metabolism	Xenobiotics Biodegradation and Metabolism	Atrazine degradation	4572	961	5395	1573	22285	2552	10253	8472	15459	1464	1260	4970	1313	2720	12949
Metabolism	Xenobiotics Biodegradation and Metabolism	Benzoate degradation	46516	43503	83363	58222	127487	79389	67852	83331	100729	32921	49467	51013	50672	51119	51396
Metabolism	Xenobiotics Biodegradation and Metabolism	Bisphenol degradation	6501	8206	22988	8014	19676	22884	7997	26791	17969	8624	11774	15311	9349	13755	9878
Metabolism	Xenobiotics Biodegradation and Metabolism	Caprolactam degradation	4995	2262	7662	2269	77260	6645	41290	14718	57798	714	1000	908	1451	1606	4701
Metabolism	Xenobiotics Biodegradation and Metabolism	Chloroalkane and chloroalkene degradation	39509	35859	67400	47848	69591	66808	40683	64316	61248	29639	44696	40500	47095	42209	39088
Metabolism	Xenobiotics Biodegradation and Metabolism	Chlorocyclohexane and chlorobenzene degradation	7596	4677	6526	7768	13687	3867	6793	8304	6899	3115	5358	639	6897	3376	5649
Metabolism	Xenobiotics Biodegradation and Metabolism	Dioxin degradation	16242	14086	26057	20321	11984	27488	8615	13660	15459	8629	14446	10298	16941	12468	10067
Metabolism	Xenobiotics Biodegradation and Metabolism	Drug metabolism - cytochrome P450	15821	6684	15356	11883	56003	9765	28738	20662	39266	3462	6017	1508	7525	4073	5964
Metabolism	Xenobiotics Biodegradation and Metabolism	Ethylbenzene degradation	5243	5222	11151	4795	13230	9476	7541	15253	12158	3427	4374	10656	3564	6835	13090
Metabolism	Xenobiotics Biodegradation and Metabolism	Fluorobenzoate degradation	2086	121	2021	329	5780	559	122	2232	991	89	154	96	179	203	602
Metabolism	Xenobiotics Biodegradation and Metabolism	Metabolism of xenobiotics by cytochrome P450	15545	6565	14998	11564	50618	9587	25702	19490	35599	3504	6035	1547	7699	4026	5823
Metabolism	Xenobiotics Biodegradation and Metabolism	Naphthalene degradation	31210	28213	45441	34765	73076	43549	43214	44885	61317	16719	25032	24718	28813	24318	32831
Metabolism	Xenobiotics Biodegradation and Metabolism	Nitrotoluene degradation	6700	6563	13874	6628	13176	15836	8553	25633	14133	8075	8490	20290	8271	13064	10152
Metabolism	Xenobiotics Biodegradation and Metabolism	Polycyclic aromatic hydrocarbon degradation	22587	21403	39407	28934	28491	40454	19386	32846	28135	18875	26243	20494	27492	25348	17776
Metabolism	Xenobiotics Biodegradation and Metabolism	Styrene degradation	3806	4625	11839	2175	27108	12056	12064	13337	20516	1238	1529	4315	1144	3651	2322
Metabolism	Xenobiotics Biodegradation and Metabolism	Toluene degradation	23200	20404	25169	23084	38151	23887	25283	67585	33649	14128	13876	14991	20505	13942	19844
Metabolism	Xenobiotics Biodegradation and Metabolism	Xylene degradation	15151	14663	27757	19121	11086	29784	8442	12407	16128	8587	14453	10258	16725	12915	8638
Organismal Systems	Circulatory System	Cardiac muscle contraction	792	77	674	310	15750	353	8462	2834	11313	13	26	18	25	39	164
Organismal Systems	Digestive System	Bile secretion	7	11	15	5	10	14	1	89	8	66	64	112	195	26	16
Organismal Systems	Digestive System	Carbohydrate digestion and absorption	6546	8121	8739	7370	4571	8640	3844	5804	5005	3074	5351	1134	6999	3817	2426
Organismal Systems	Digestive System	Mineral absorption	3468	1734	3337	357	1575	1541	53	5029	969	533	369	1355	706	677	1040
Organismal Systems	Digestive System	Protein digestion and absorption	5474	7614	3994	6891	3821	3709	3680	3854	2925	3726	5176	1681	7744	3593	7081
Organismal Systems	Endocrine System	Adipocytokine signaling pathway	23031	23123	20277	29406	27029	18401	21098	19664	20437	15999	22582	12491	31241	17634	16237
Organismal Systems	Endocrine System	GnRH signaling pathway	208	2	7	3	4149	7	2814	17	3491	1	0	0	0	1	46
Organismal Systems	Endocrine System	Insulin signaling pathway	15136	13860	26488	11607	13666	25515	8877	19335	16494	9343	14430	12760	14547	13829	15747
Organismal Systems	Endocrine System	Melanogenesis	2	0	3	0	294	1	0	1	2	0	0	0	0	0	0
Organismal Systems	Endocrine System	PPAR signaling pathway	30730	27354	34616	35537	46940	31740	31730	33201	38079	20107	28555	20689	35989	24606	22951
Organismal Systems	Endocrine System	Progesterone-mediated oocyte maturation	4101	5073	9306	3376	6873	9135	4620	9911	7695	5015	6051	9453	5392	7562	4228
Organismal Systems	Endocrine System	Renin-angiotensin system	3	2	21	14	7	13	3	96	169	1	1	0	4	1	4
Organismal Systems	Environmental Adaptation	Circadian rhythm - plant	16	9	45	32	272	45	12	156	62	4	6	4	7	12	439
Organismal Systems	Environmental Adaptation	Plant-pathogen interaction	20873	21960	40460	23058	32185	40619	21488	41884	35104	19573	26890	35573	25226	29654	24471
Organismal Systems	Excretory System	Aldosterone-regulated sodium reabsorption	0	0	0	0	0	0	0	20	1	0	0	0	0	0	0
Organismal Systems	Excretory System	Proximal tubule bicarbonate reclamation	2702	1105	3281	1563	2021	1918	477	3606	1338	1952	1241	5744	2102	2893	4817
Organismal Systems	Excretory System	Vasopressin-regulated water reabsorption	0	0	4	1	2	2	0	16	2	0	0	0	0	0	0
Organismal Systems	Immune System	Antigen processing and presentation	4101	5073	9306	3376	6873	9135	4620	9911	7695	5015	6051	9453	5392	7562	4228
Organismal Systems	Immune System	Fc gamma R-mediated phagocytosis	208	2	7	3	4149	7	2814	17	3491	1	0	0	0	1	46
Organismal Systems	Immune System	Hematopoietic cell lineage	1	0	2	2	1	3	3	2	2	0	1	0	0	1	0
Organismal Systems	Immune System	Leukocyte transendothelial migration	0	0	0	0	0	0	0	1	0	0	0	0	0	0	0
Organismal Systems	Immune System	NOD-like receptor signaling pathway	4132	5102	9357	3388	6875	9157	4624	9996	7711	5042	6074	9524	5436	7634	4263
Organismal Systems	Immune System	RIG-I-like receptor signaling pathway	18	26	280	174	167	175	32	1365	158	54	40	38	119	32	29
Organismal Systems	Nervous System	Glutamatergic synapse	20813	20041	31903	24839	28366	30810	17840	27154	24118	17909	24683	23130	26361	24558	16380
Organismal Systems	Sensory System	Phototransduction - fly	0	0	0	0	0	0	0	1	0	0	0	0	0	0	0
Unclassified	Cellular Processes and Signaling	Cell division	11411	12004	15633	11626	21973	15501	14569	21559	19127	9953	11703	13276	13357	12136	12545
Unclassified	Cellular Processes and Signaling	Cell motility and secretion	34022	27430	44500	30055	72755	39451	41044	55468	59201	21043	25798	29808	30572	27288	31776
Unclassified	Cellular Processes and Signaling	Electron transfer carriers	1642	883	2575	676	378	1804	301	5730	1392	1288	1050	3145	1810	1748	2364
Unclassified	Cellular Processes and Signaling	Germination	1722	2288	3864	2645	1493	2930	2257	5449	1541	4186	4560	12078	4431	6398	10652
Unclassified	Cellular Processes and Signaling	Inorganic ion transport and metabolism	25478	25078	45670	27861	69987	44668	34724	53930	56975	19282	25709	26302	28419	25255	31914
Unclassified	Cellular Processes and Signaling	Membrane and intracellular structural molecules	66095	69009	85414	52460	164818	74026	89353	147637	130725	54142	56729	78020	66787	64035	79201
Unclassified	Cellular Processes and Signaling	Other ion-coupled transporters	195447	190690	276213	220229	329864	256015	197870	345368	281498	151845	209874	228760	211849	210572	216238
Unclassified	Cellular Processes and Signaling	Other transporters	36826	35886	67301	37595	77128	63136	45937	72558	71155	31753	43815	56344	42124	49143	48718
Unclassified	Cellular Processes and Signaling	Pores ion channels	51012	42113	57686	30700	126209	43574	61404	86627	91623	29226	32460	46572	39750	36557	74187
Unclassified	Cellular Processes and Signaling	Signal transduction mechanisms	103106	86491	145930	114895	136700	138325	92102	113542	129016	73084	107616	101616	112049	104804	86729
Unclassified	Cellular Processes and Signaling	Sporulation	53589	52240	102293	50321	28835	90136	23308	115253	41976	63679	101850	197724	71028	121700	115170
Unclassified	Genetic Information Processing	Protein folding and associated processing	130307	120995	189599	138792	215783	174517	139853	185893	188391	95074	131010	112720	146428	125362	123187
Unclassified	Genetic Information Processing	Replication, recombination and repair proteins	178625	159027	244933	212959	198114	220244	146716	250239	187582	130157	181970	184535	201172	183105	150436
Unclassified	Genetic Information Processing	Restriction enzyme	22142	20929	40765	25581	41396	41647	30100	37624	47981	25470	29416	38761	29025	34464	35595
Unclassified	Genetic Information Processing	Transcription related proteins	786	539	1698	1925	2333	2080	245	1333	1617	111	226	644	215	369	507
Unclassified	Genetic Information Processing	Translation proteins	176583	174453	264036	199217	252512	256239	177879	248441	244108	138100	193448	199155	207016	193487	178016
Unclassified	Metabolism	Amino acid metabolism	28524	24482	45771	27531	36476	36761	24113	50006	34259	24847	29396	48776	29615	37295	39933
Unclassified	Metabolism	Biosynthesis and biodegradation of secondary metabolites	4829	2891	7351	3979	17927	5530	7557	10804	10272	5144	5102	9274	5343	7314	10711
Unclassified	Metabolism	Carbohydrate metabolism	32045	26668	44667	34231	23977	43549	17561	30787	23666	23720	34310	26056	36694	31341	23272
Unclassified	Metabolism	Energy metabolism	119793	128196	183703	123021	224900	168173	143147	222129	196264	114212	144289	198403	147954	160214	158992
Unclassified	Metabolism	Glycan biosynthesis and metabolism	4474	4633	8509	1813	9269	6705	3576	15087	7789	2912	1890	7940	2651	4481	2452
Unclassified	Metabolism	Lipid metabolism	18487	14523	36508	11204	28536	38353	12581	31736	28535	11159	14637	27724	12876	19514	21769
Unclassified	Metabolism	Metabolism of cofactors and vitamins	16639	13419	29719	13266	50048	25468	25722	40216	44033	9005	9636	24847	8691	16124	16122
Unclassified	Metabolism	Nucleotide metabolism	8869	8387	11980	15408	6246	9680	7473	11139	6581	11611	15182	12295	15817	14407	6926
Unclassified	Metabolism	Others	176814	137204	237781	194921	217148	213963	139737	233195	184769	129899	183713	180955	191157	178245	188552
Unclassified	Poorly Characterized	Function unknown	221124	202672	371832	233114	457593	374404	260867	349104	410643	155562	207010	225362	226573	219204	240916
Unclassified	Poorly Characterized	General function prediction only	603578	579812	1008551	659265	877548	968493	557646	966477	838917	505083	684625	740675	698461	717328	630389
